# Supplementary material for: The Genome and Linkage Map of the Northern Pike (Esox lucius): Conserved Synteny Revealed between the Salmonid Sister Group and the Neoteleostei
Source: PubMed Central journal article supplement (PMC4113312; doi:10.1371/journal.pone.0102089), 2014-07-28

# PLOT OF TRANSCRIPT ORDER IN SCAFFOLD VERSUS MODEL GENOMES

- Includes largest 50 scaffolds
- 3 Genomes: Threespine Stickleback (*Gasterosteus aculeatus*), Japanese Medaka (*Oryzias latipes*), and Zebrafish (*Danio rerio*)
- Included when  $\geq 2$  Blast hits are to a given chromosome
- Each point is plotted at the midway point between the start and end of the transcript in both the Scaffold and the Chromosomes
- Each chromosome is given a different colour in the plot, and chromosomes are overlaid on the same graph
- Raw Blast results used to construct figures can be found in the second tab of Supplementary file 5

# Scaffold 1

## Scaffold 1 - *G. aculeatus* v. *E. lucius*

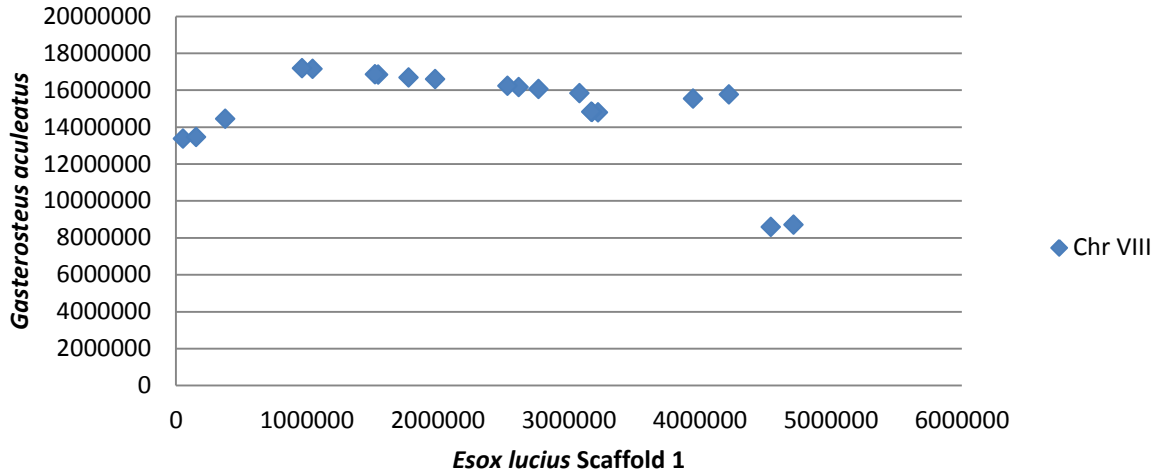

## Scaffold 1 - *O. latipes* v. *E. lucius*

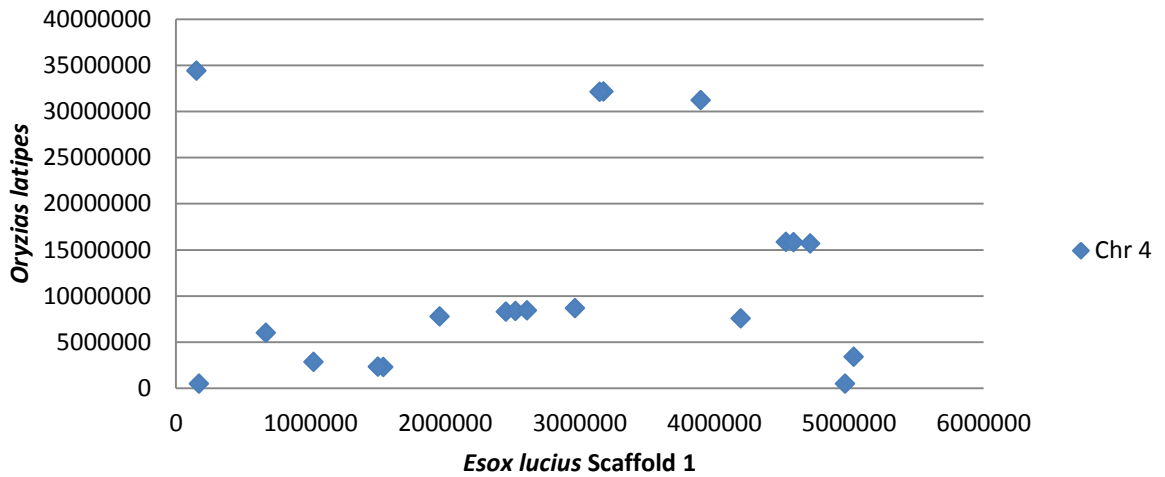

## Scaffold 1 - *D. rerio* v. *E. lucius*

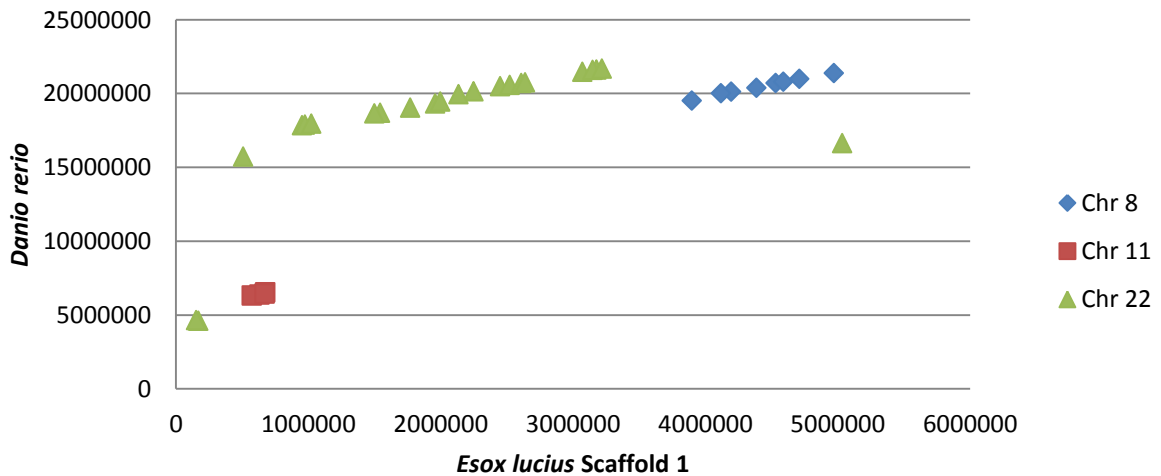

# Scaffold 2

## Scaffold 2 - *G. aculeatus* v. *E. lucius*

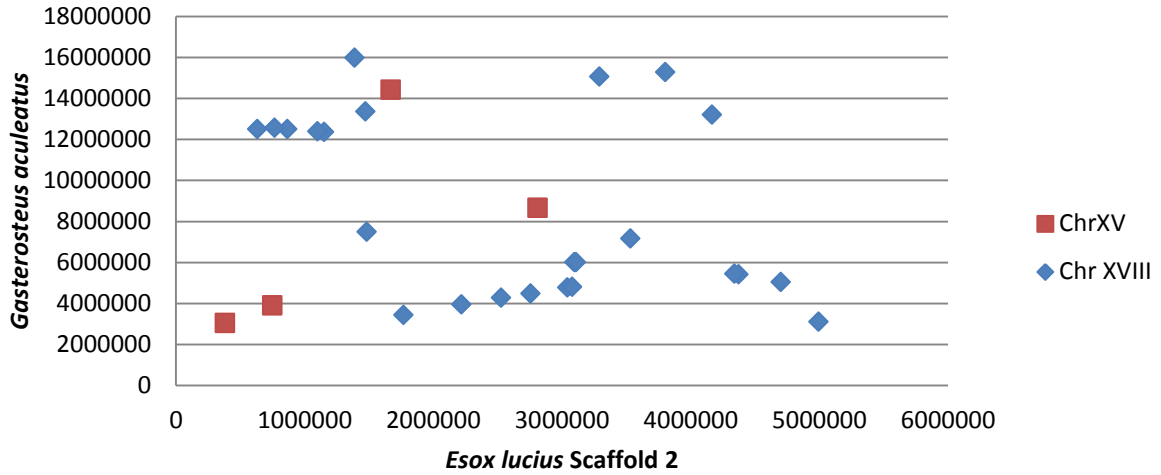

## Scaffold 2 - *O. latipes* v. *E. lucius*

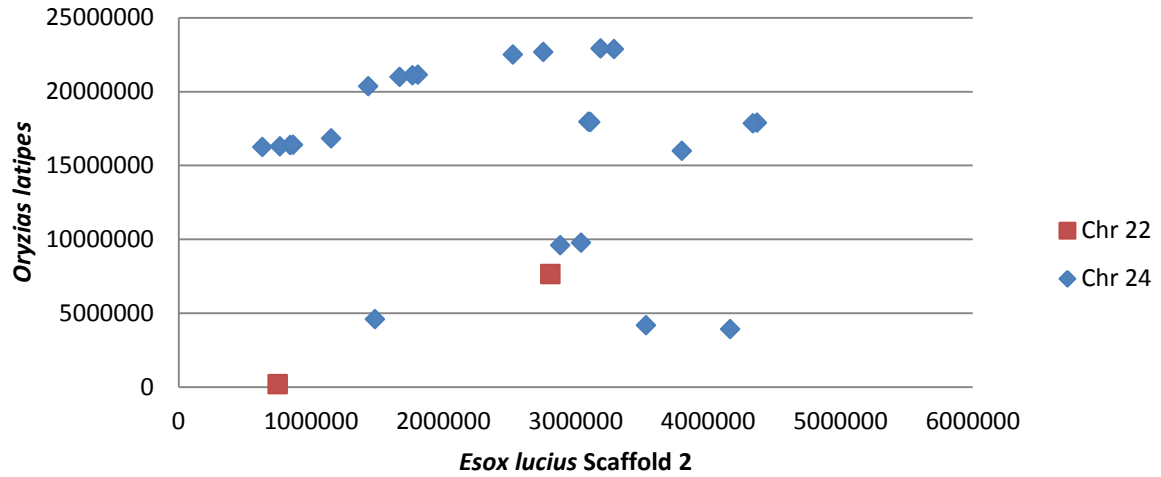

## Scaffold 2 - *D. rerio* v. *E. lucius*

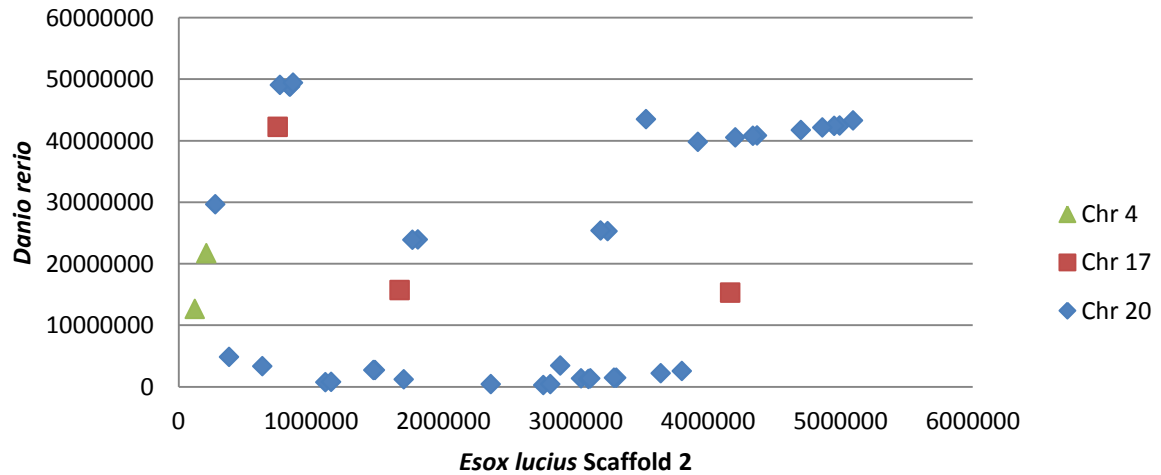

# Scaffold 3

## Scaffold 3 - *G. aculeatus* v. *E. lucius*

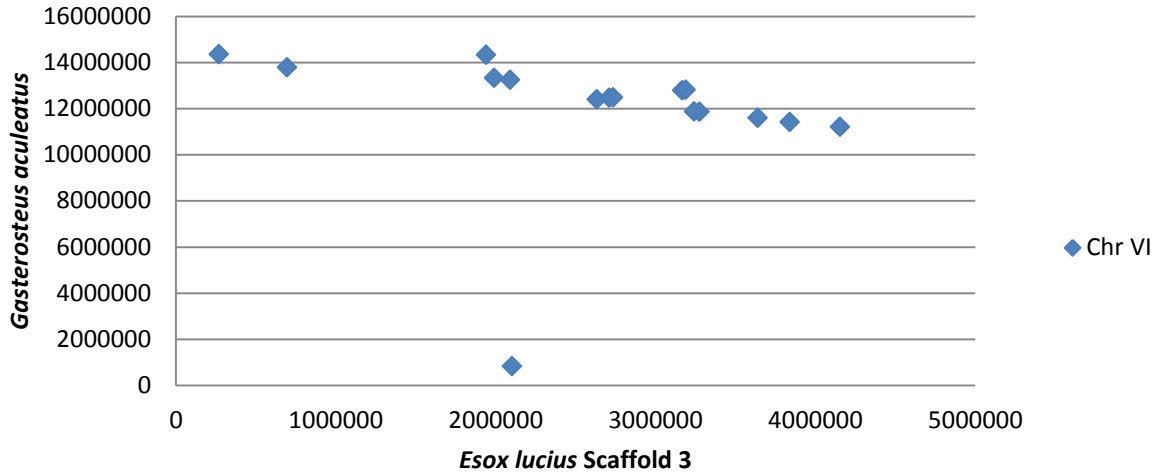

## Scaffold 3 - *O. latipes* v. *E. lucius*

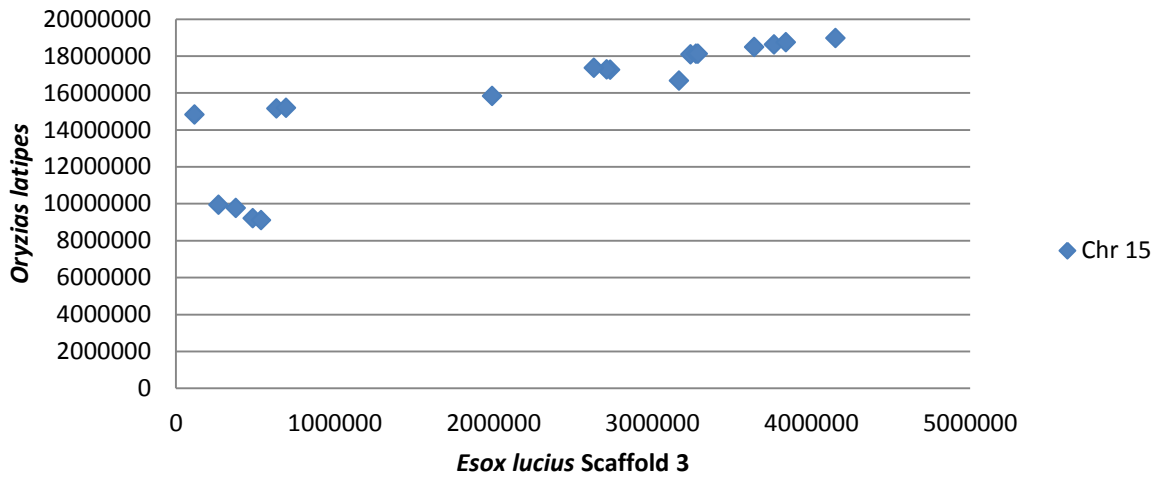

## Scaffold 3 - *D. rerio* v. *E. lucius*

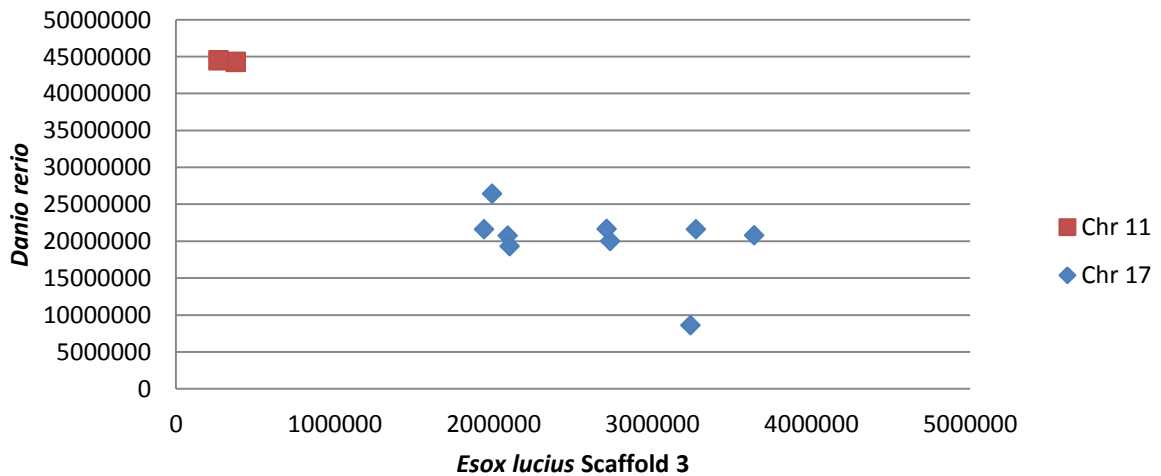

# Scaffold 4

## Scaffold 4 - *G. aculeatus* v. *E. lucius*

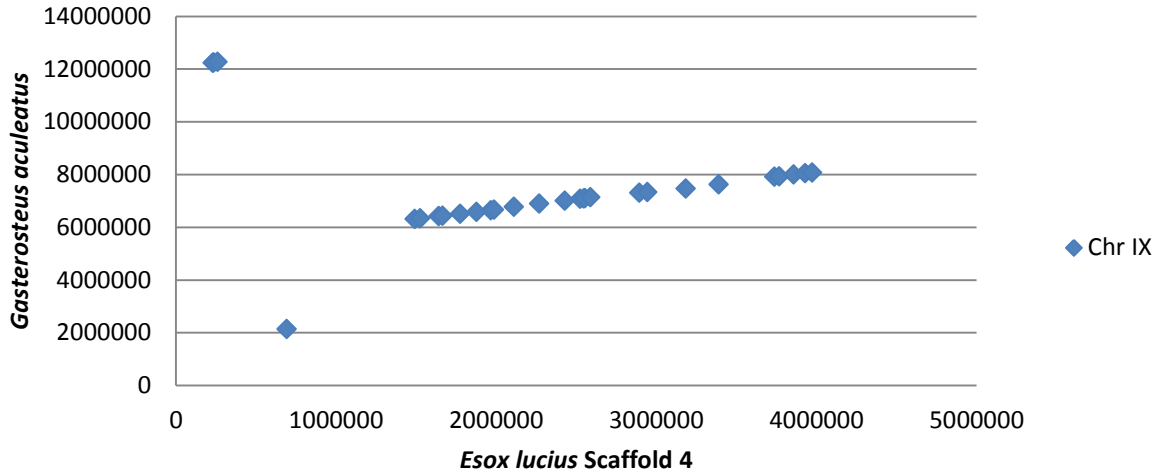

## Scaffold 4 - *O. latipes* v. *E. lucius*

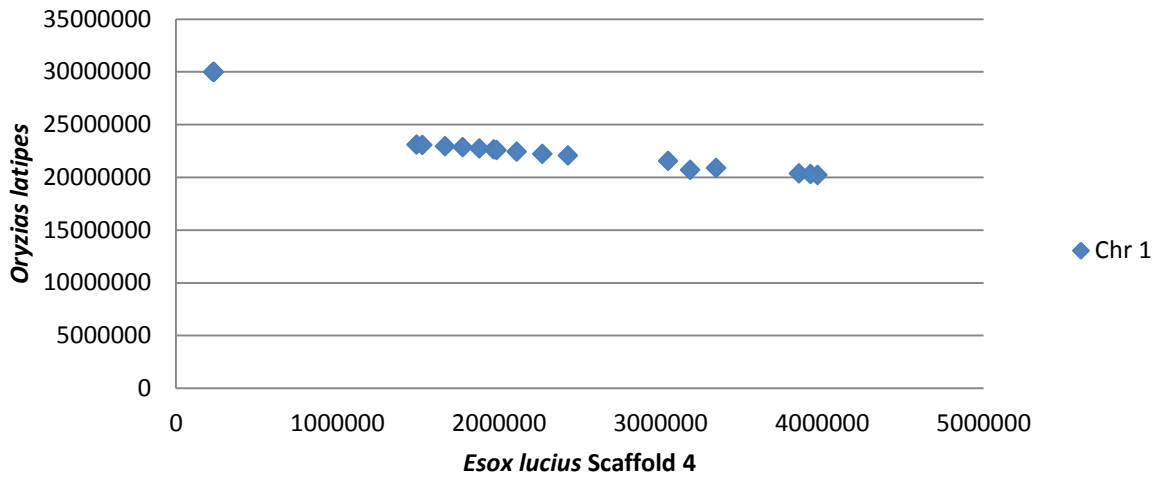

## Scaffold 4 - *D. rerio* v. *E. lucius*

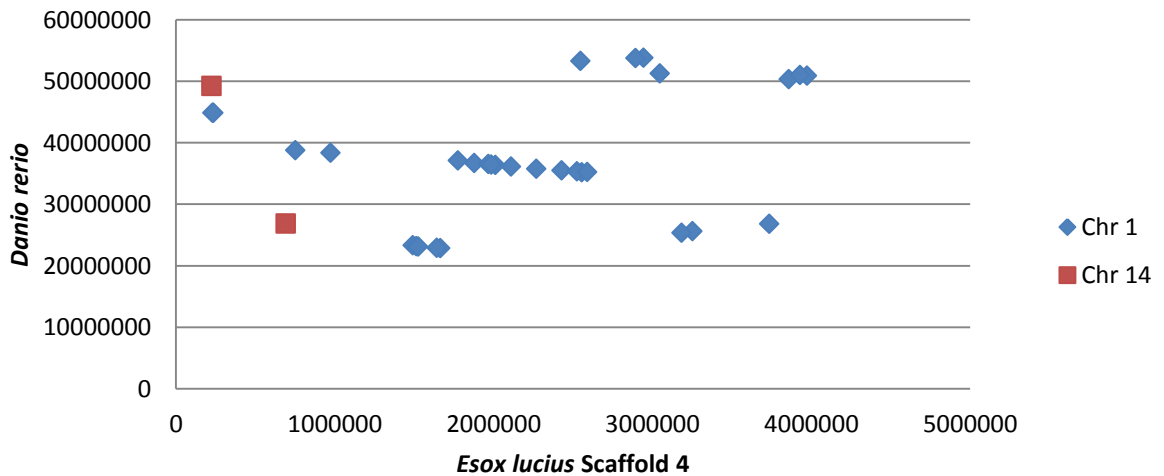

# Scaffold 5

## Scaffold 5 - *G. aculeatus* v. *E. lucius*

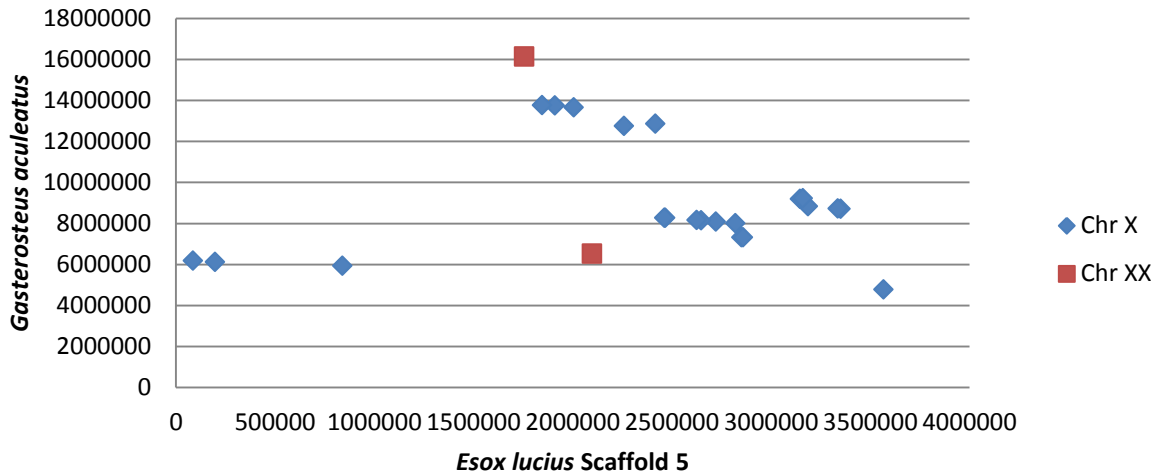

## Scaffold 5 - *O. latipes* v. *E. lucius*

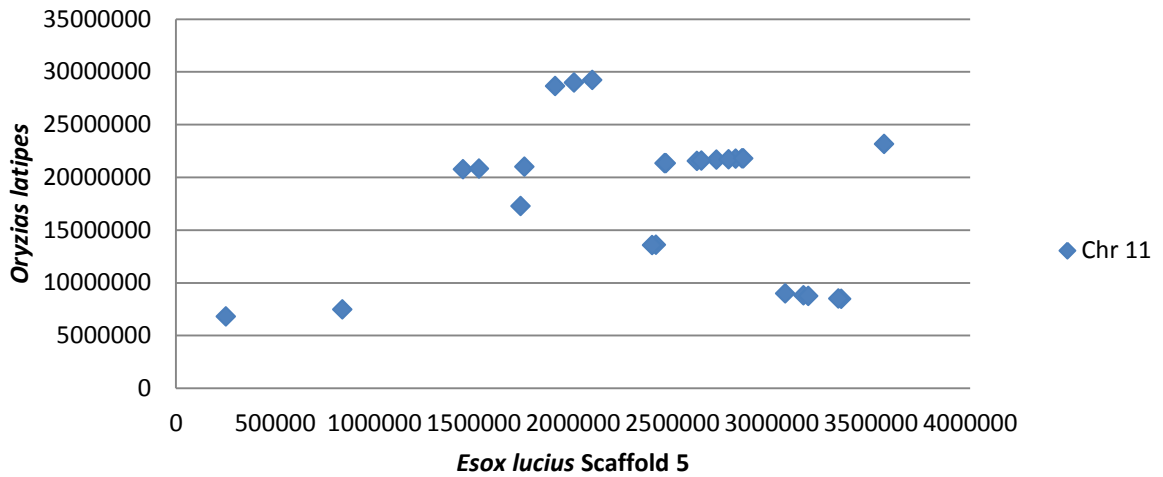

## Scaffold 5 - *D. rerio* v. *E. lucius*

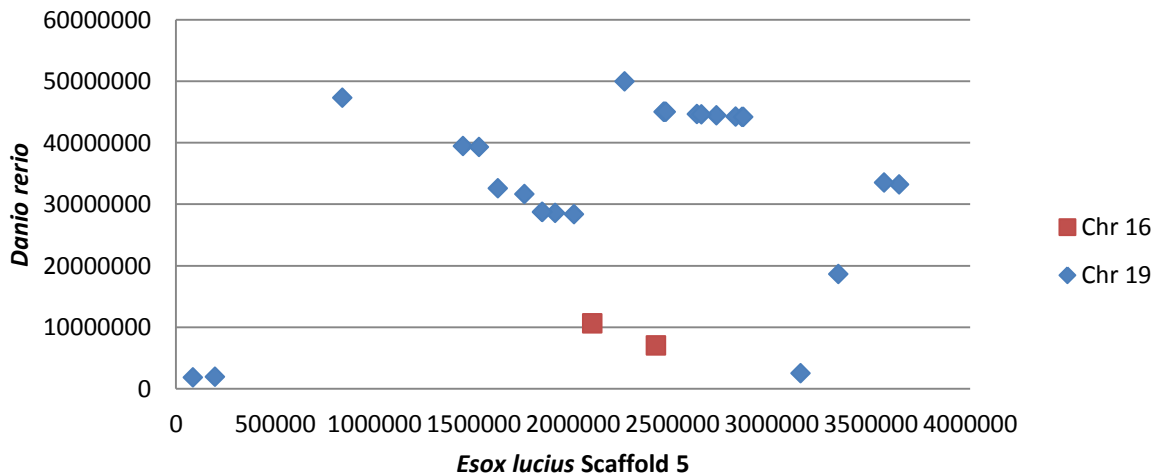

# Scaffold 6

## Scaffold 6 - *G. aculeatus* v. *E. lucius*

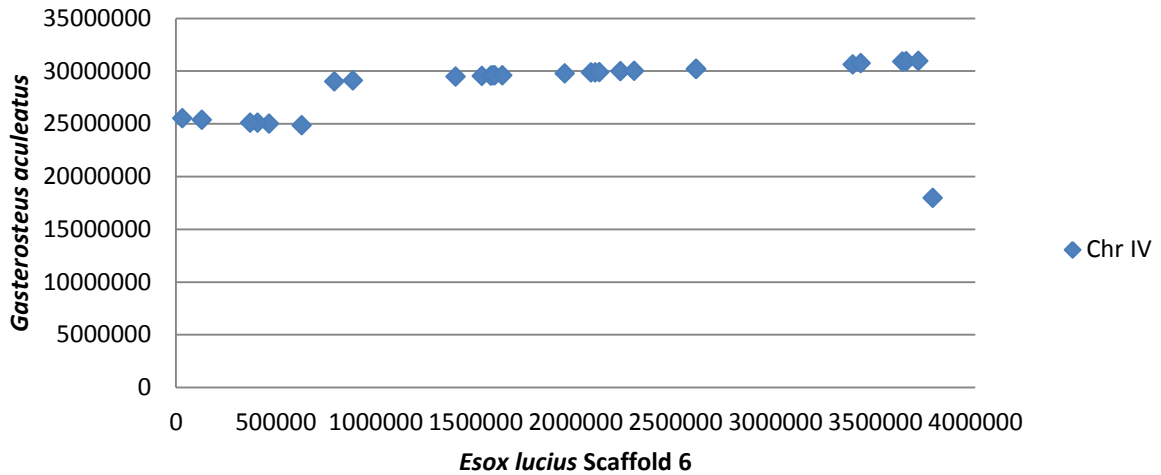

## Scaffold 6 - *O. latipes* v. *E. lucius*

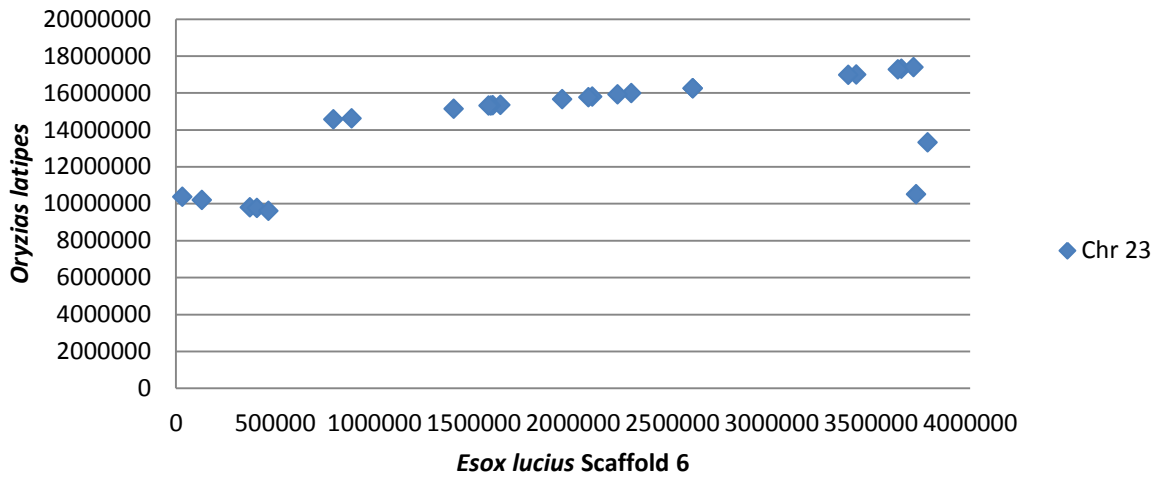

## Scaffold 6 - *D. rerio* v. *E. lucius*

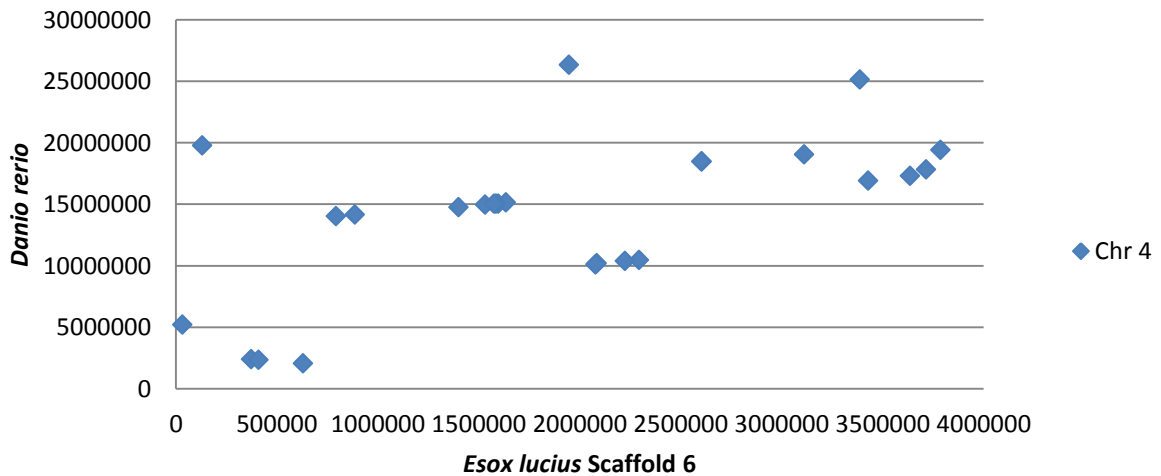

# Scaffold 7

## Scaffold 7 - *G. aculeatus* v. *E. lucius*

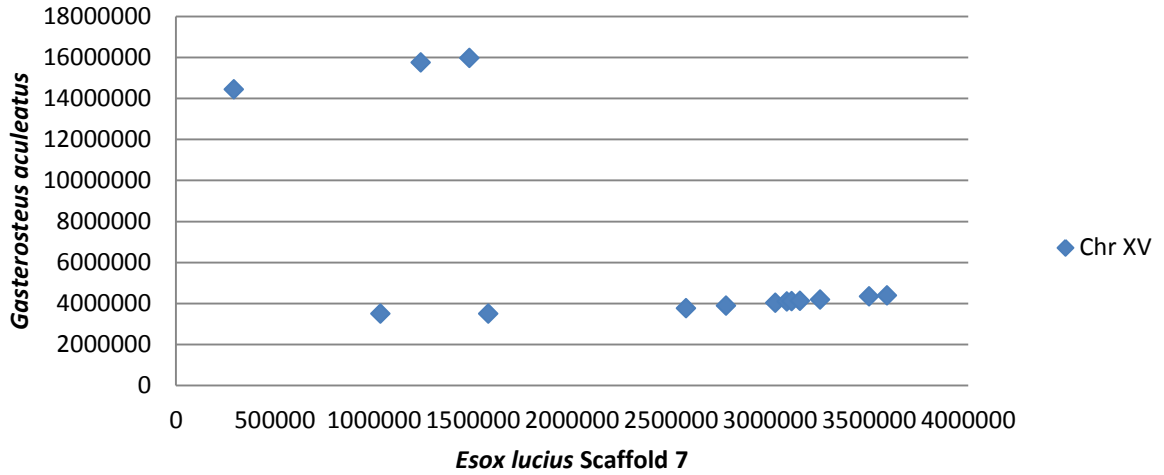

## Scaffold 7 - *O. latipes* v. *E. lucius*

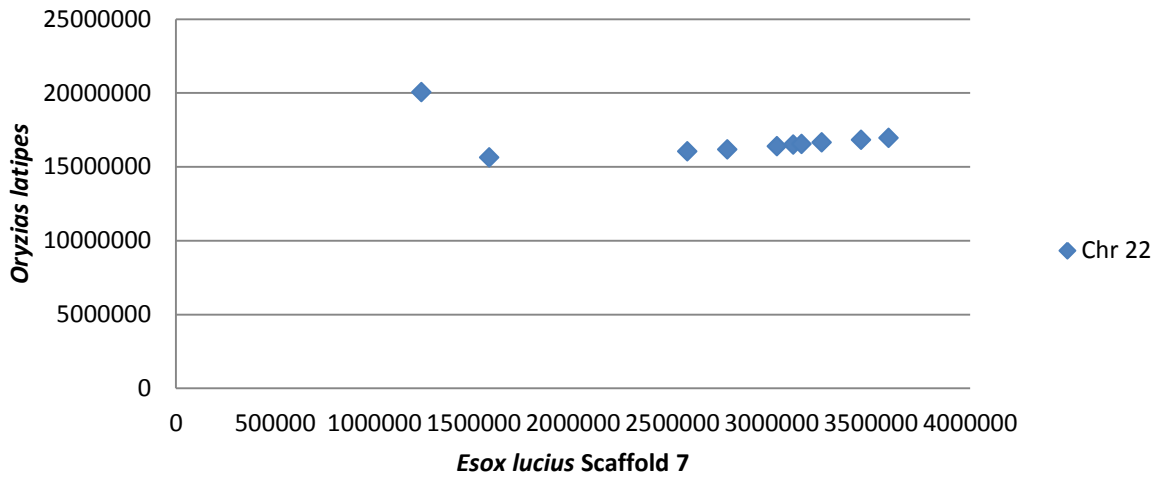

## Scaffold 7 - *D. rerio* v. *E. lucius*

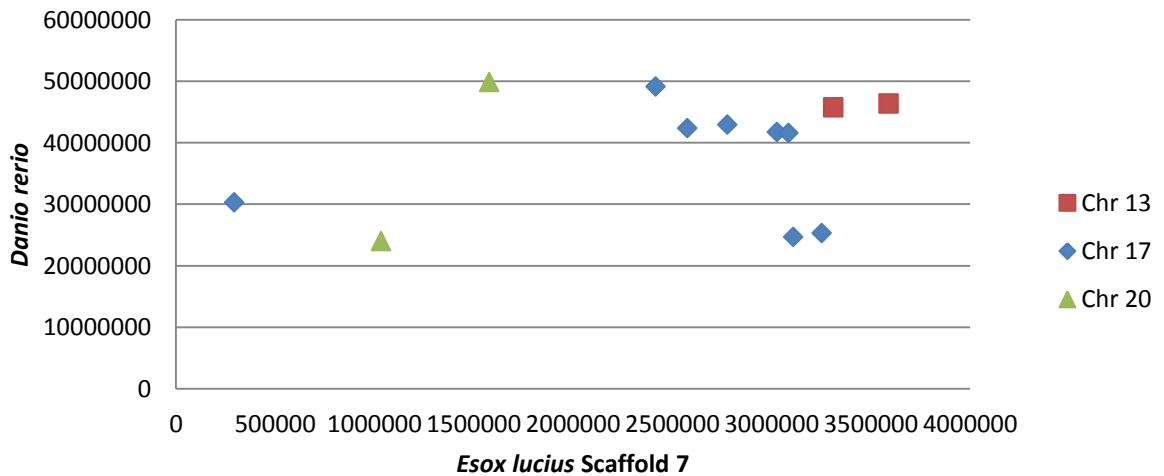



# Scaffold 8

## Scaffold 8 - *G. aculeatus* v. *E. lucius*

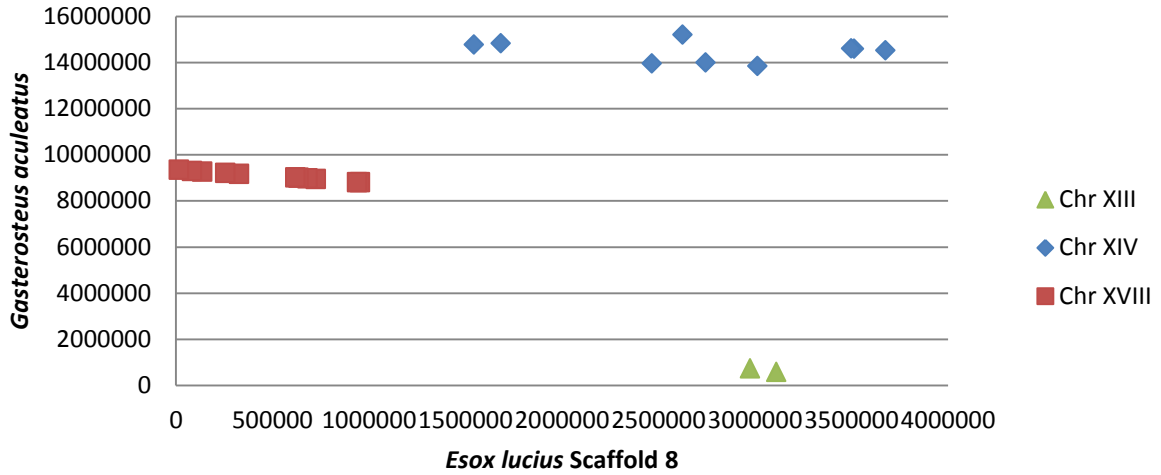

## Scaffold 8 - *O. latipes* v. *E. lucius*

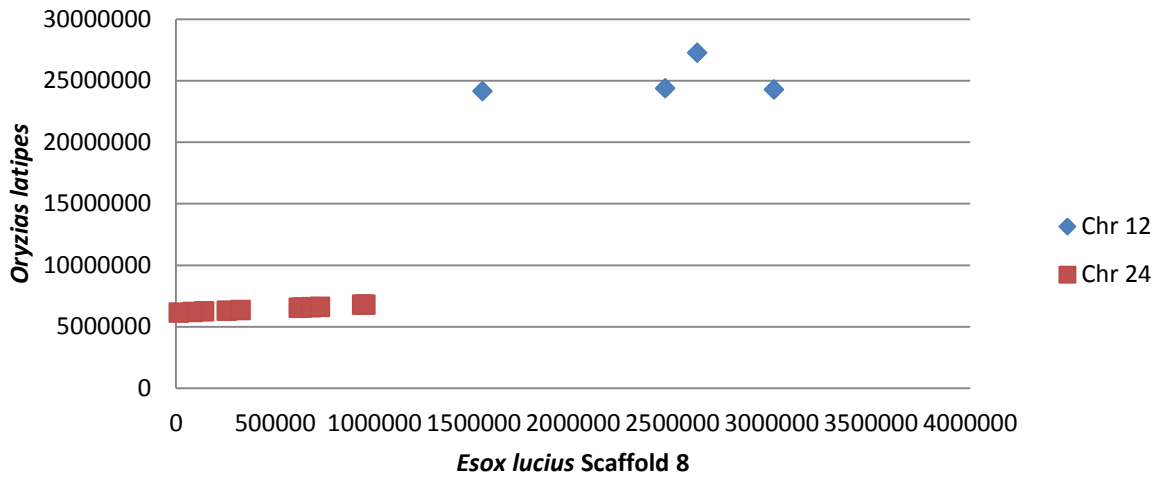

## Scaffold 8 - *D. rerio* v. *E. lucius*

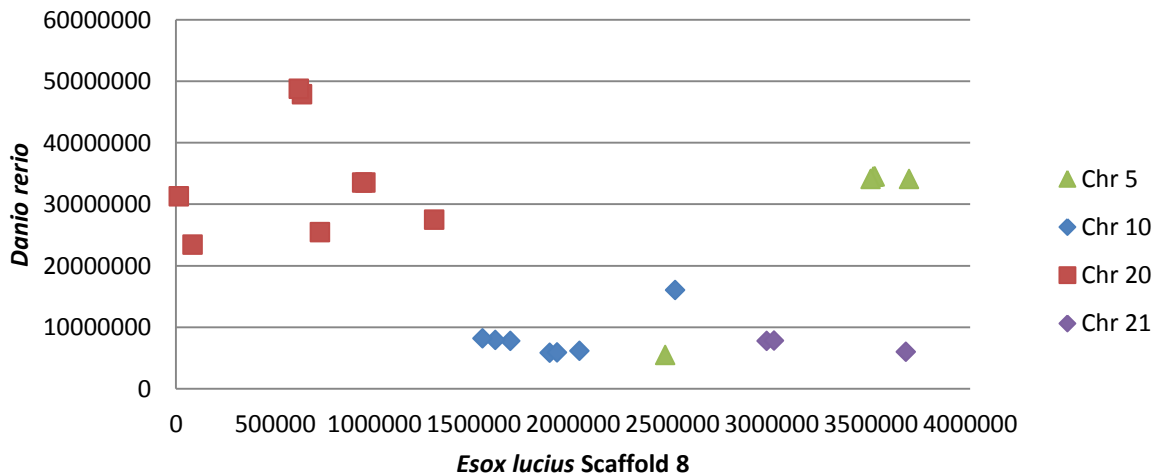

# Scaffold 9

## Scaffold 9 - *G. aculeatus* v. *E. lucius*

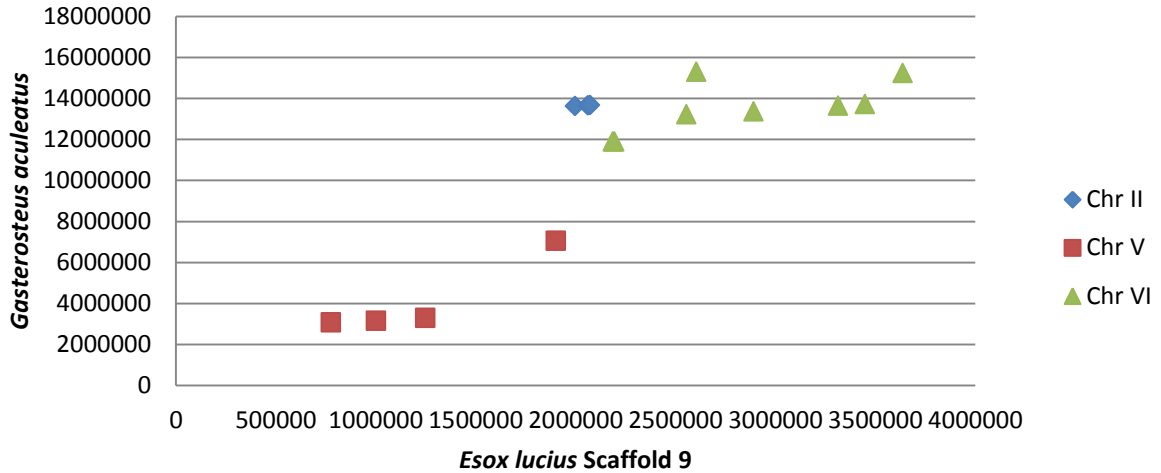

## Scaffold 9 - *O. latipes* v. *E. lucius*

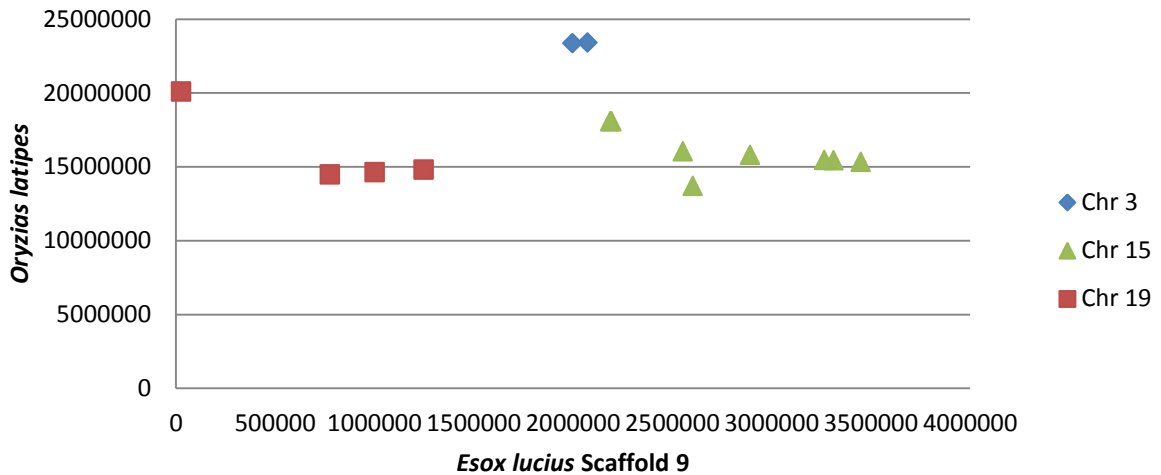

## Scaffold 9 - *D. rerio* v. *E. lucius*

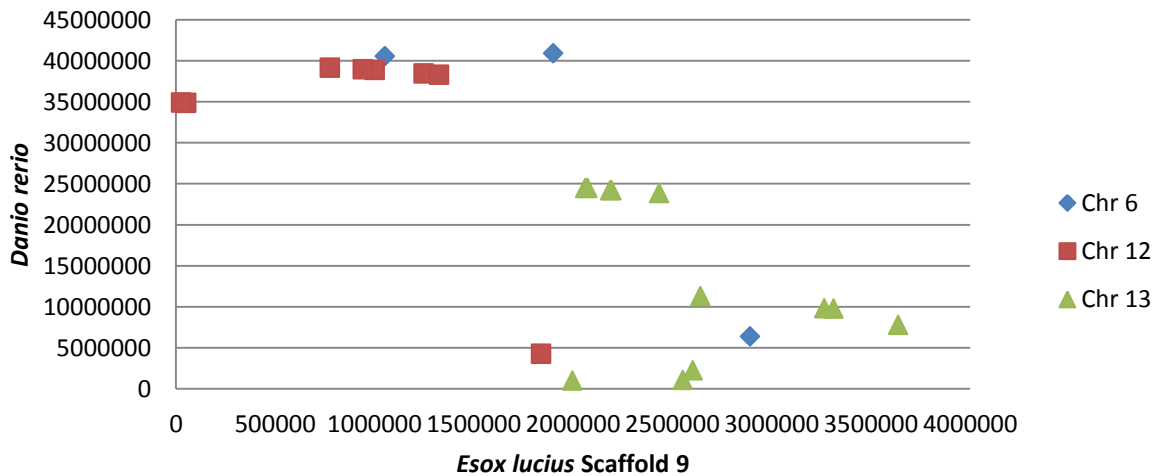



# Scaffold 11

## Scaffold 11 - *G. aculeatus* v. *E. lucius*

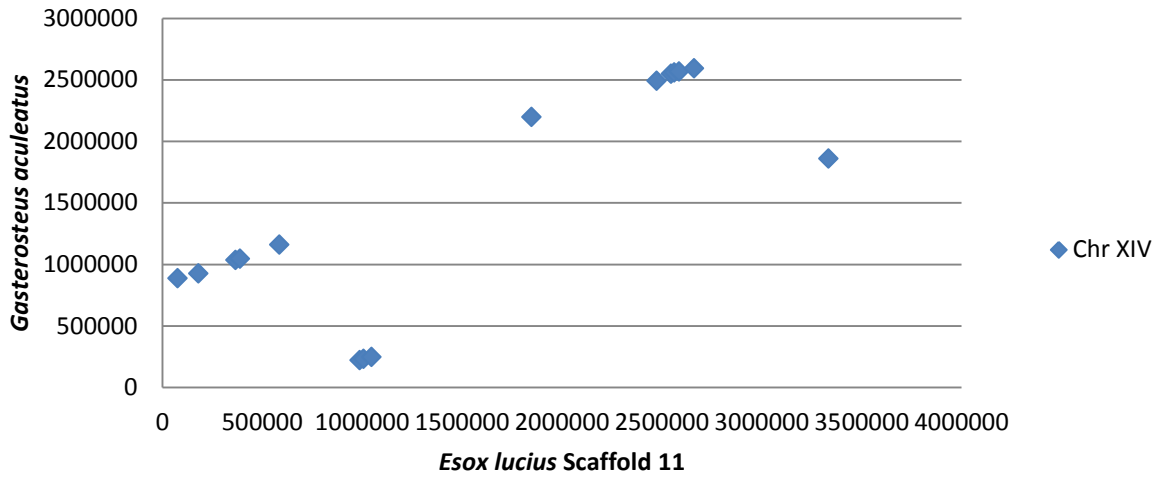

## Scaffold 11 - *O. latipes* v. *E. lucius*

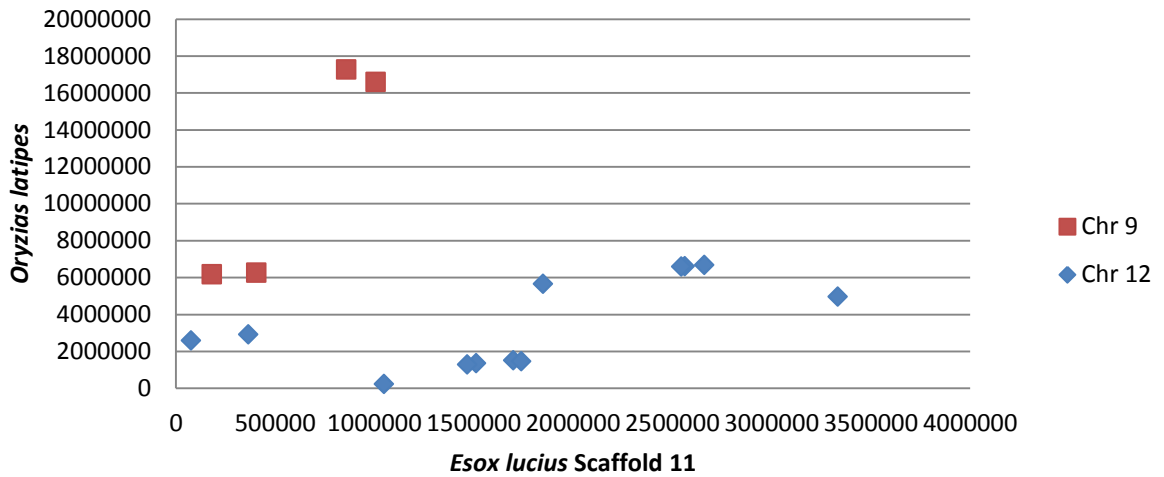

## Scaffold 11 - *D. rerio* v. *E. lucius*

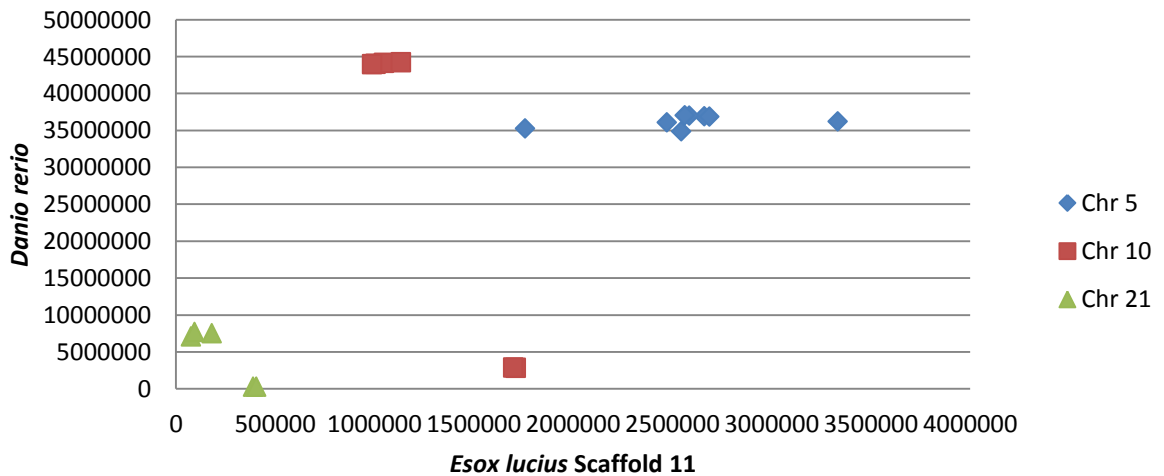

# Scaffold 12

## Scaffold 12 - *G. aculeatus* v. *E. lucius*

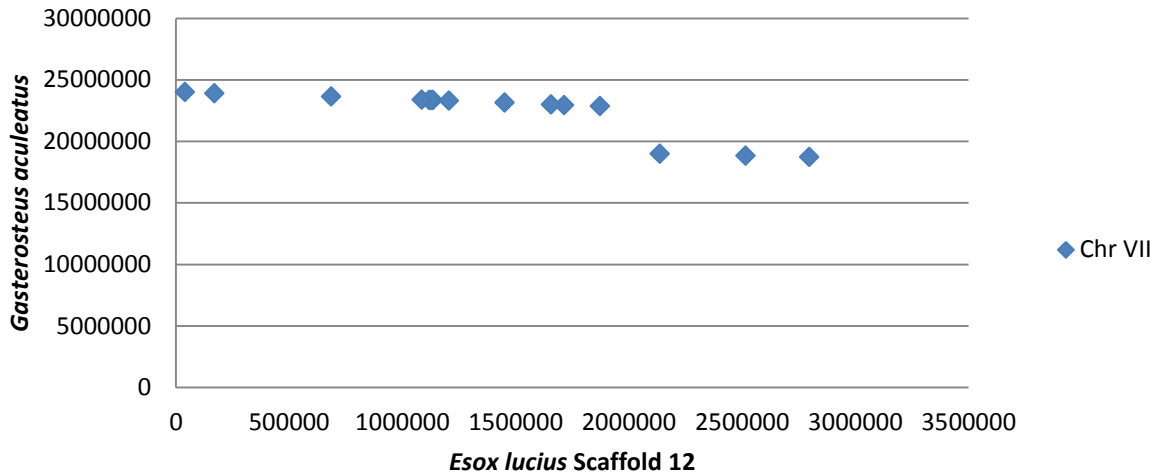

## Scaffold 12 - *O. latipes* v. *E. lucius*

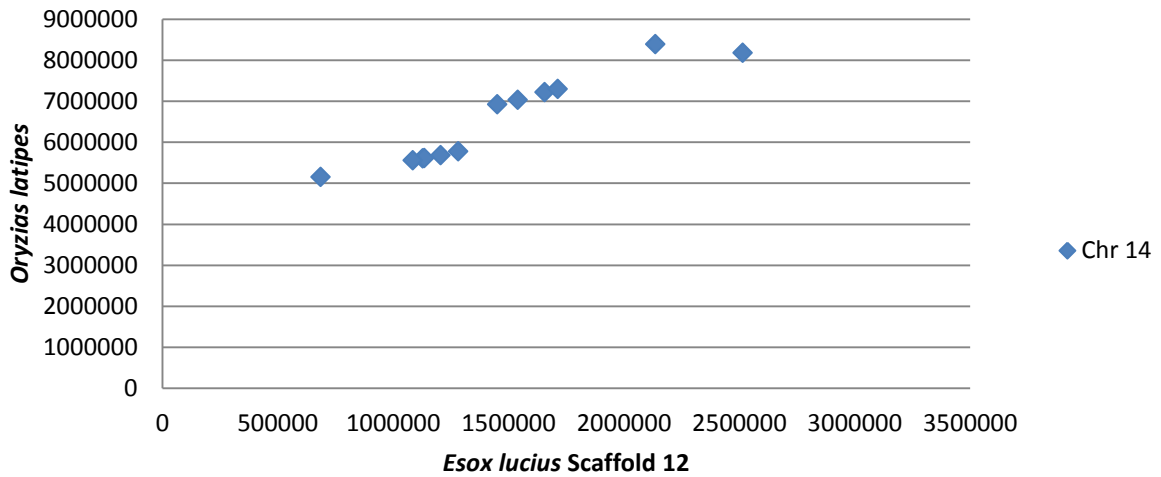

## Scaffold 12 - *D. rerio* v. *E. lucius*

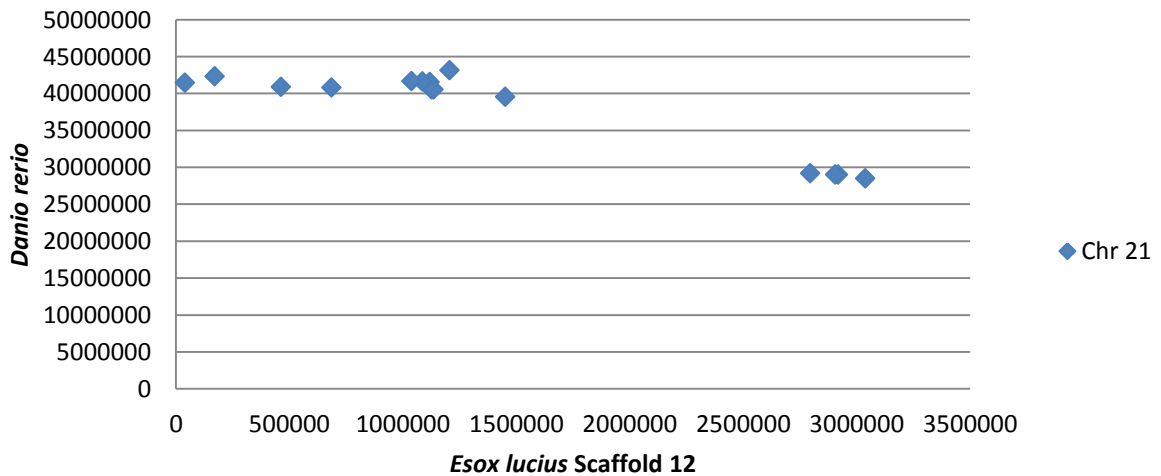

# Scaffold 13

## Scaffold 13 - *G. aculeatus* v. *E. lucius*

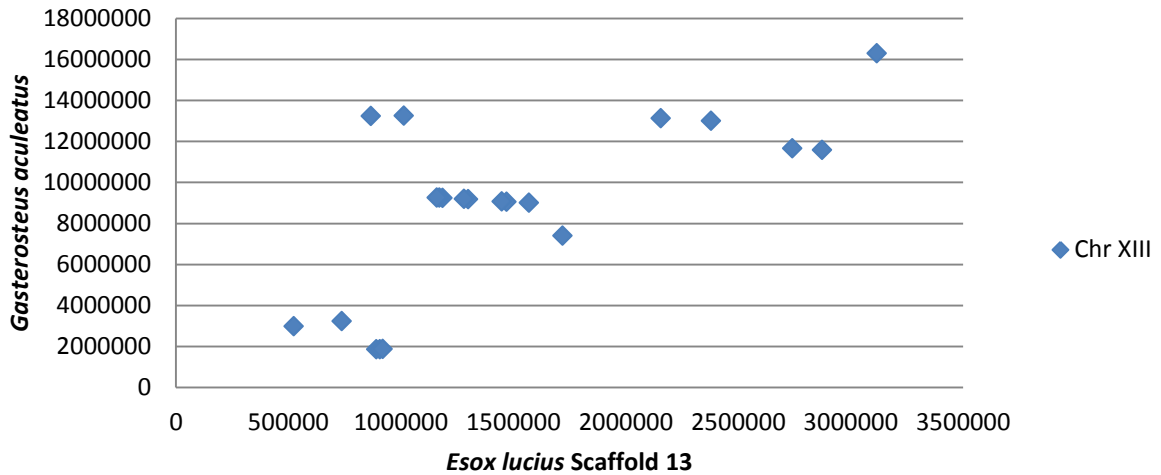

## Scaffold 13 - *O. latipes* v. *E. lucius*

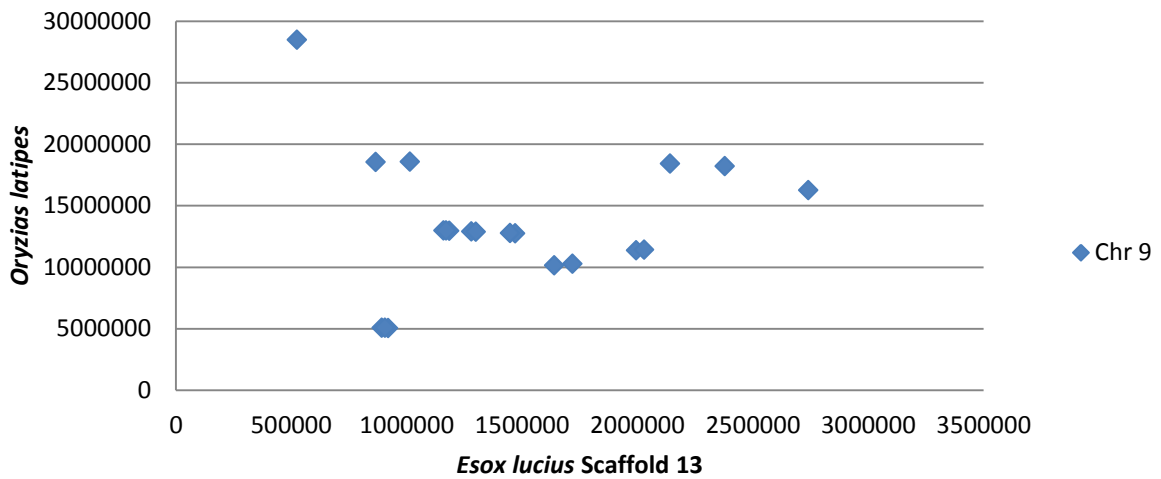

## Scaffold 13 - *D. rerio* v. *E. lucius*

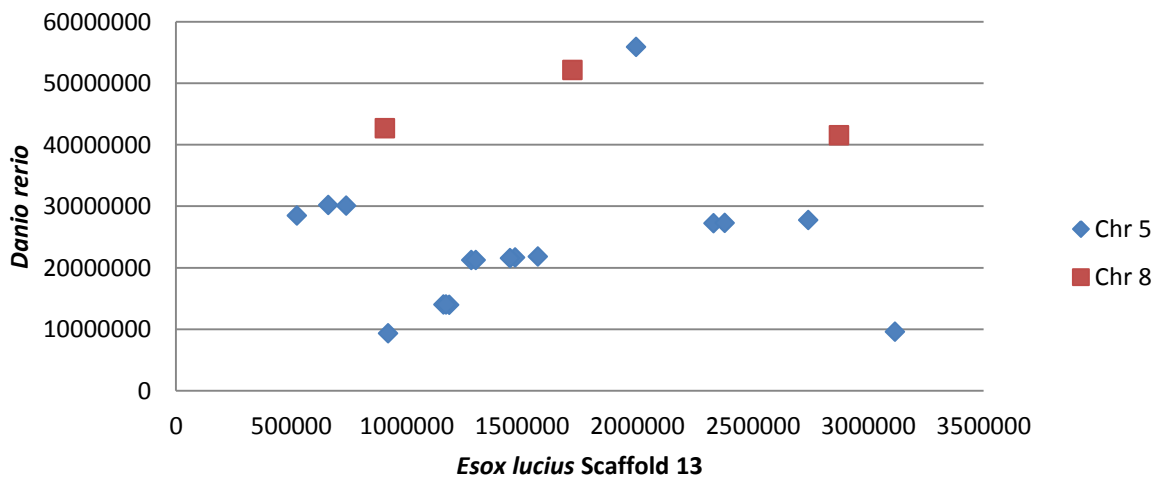

# Scaffold 14

## Scaffold 14 - *G. aculeatus* v. *E. lucius*

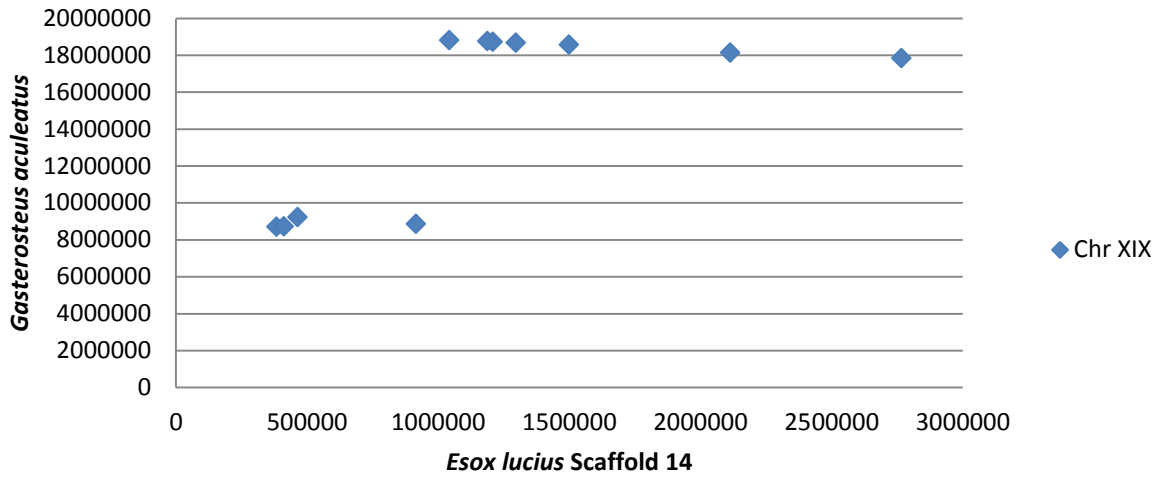

## Scaffold 14 - *O. latipes* v. *E. lucius*

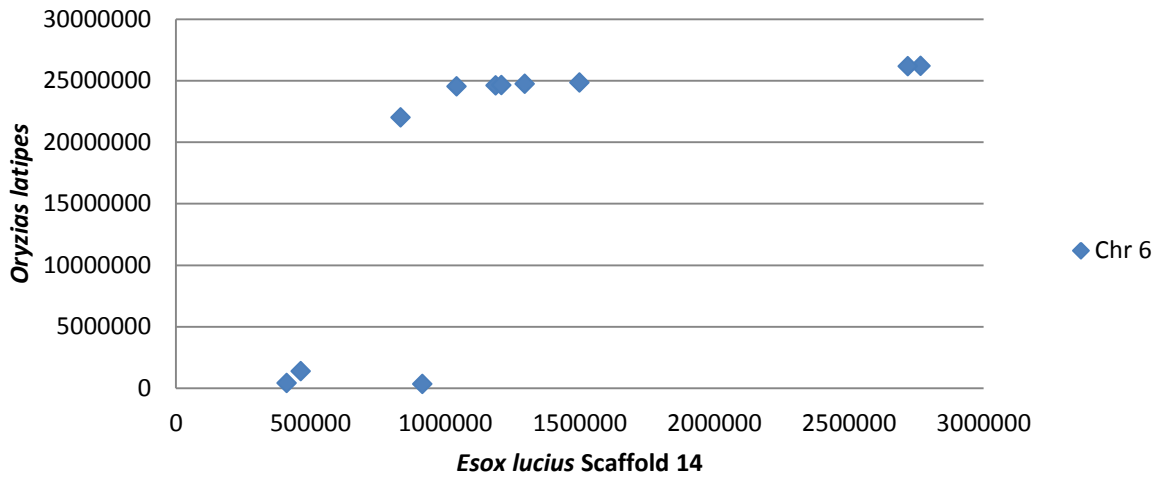

## Scaffold 14 - *D. rerio* v. *E. lucius*

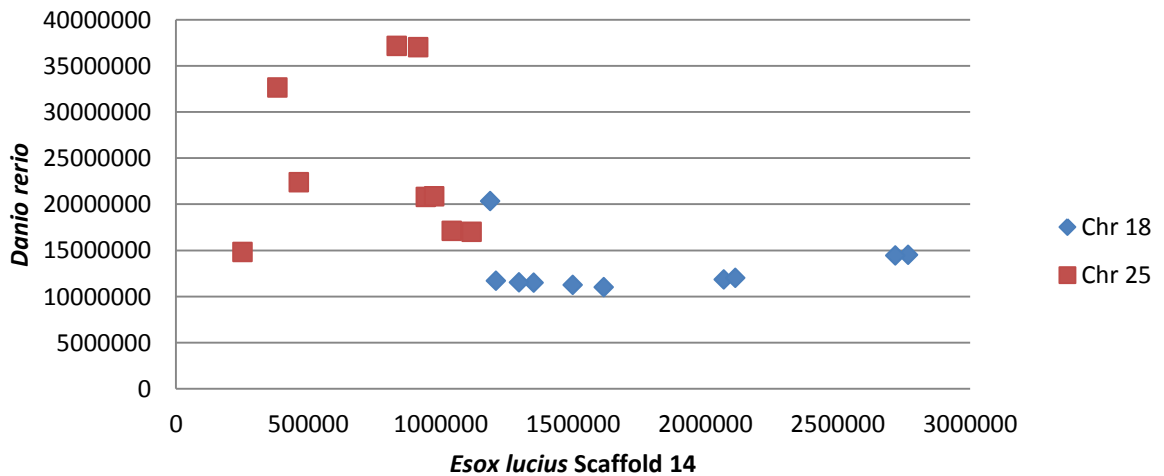

# Scaffold 15

## Scaffold 15- *G. aculeatus* v. *E. lucius*

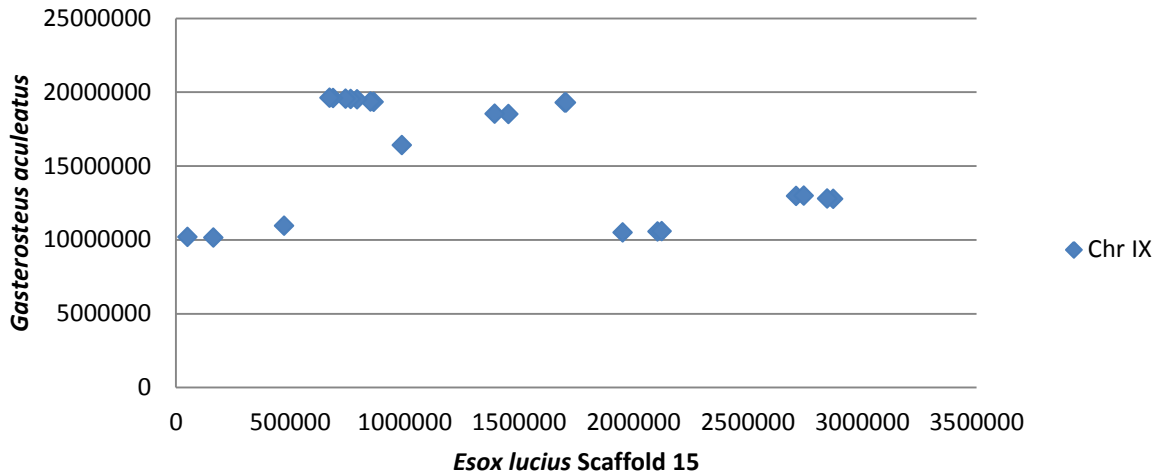

## Scaffold 15 - *O. latipes* v. *E. lucius*

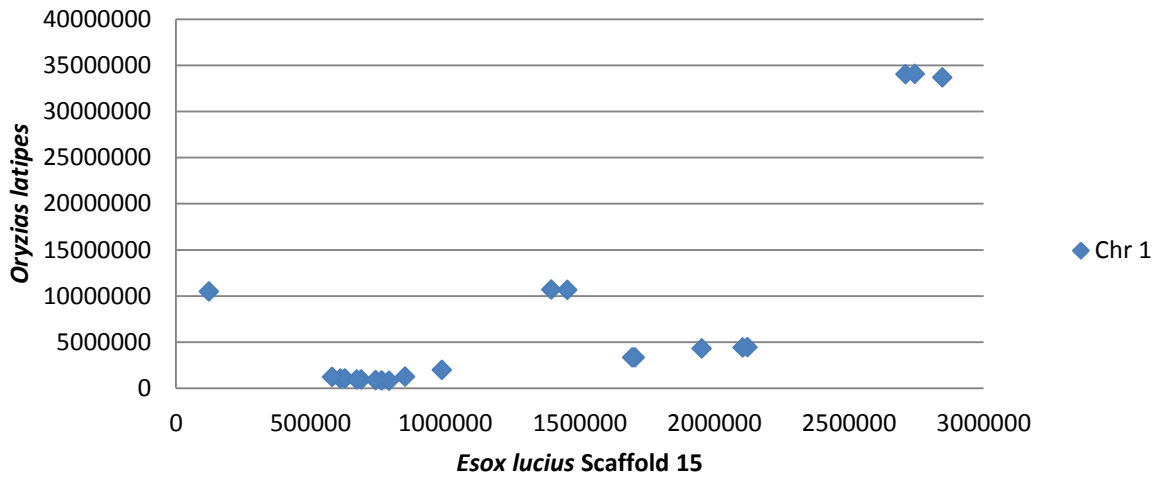

## Scaffold 15 - *D. rerio* v. *E. lucius*

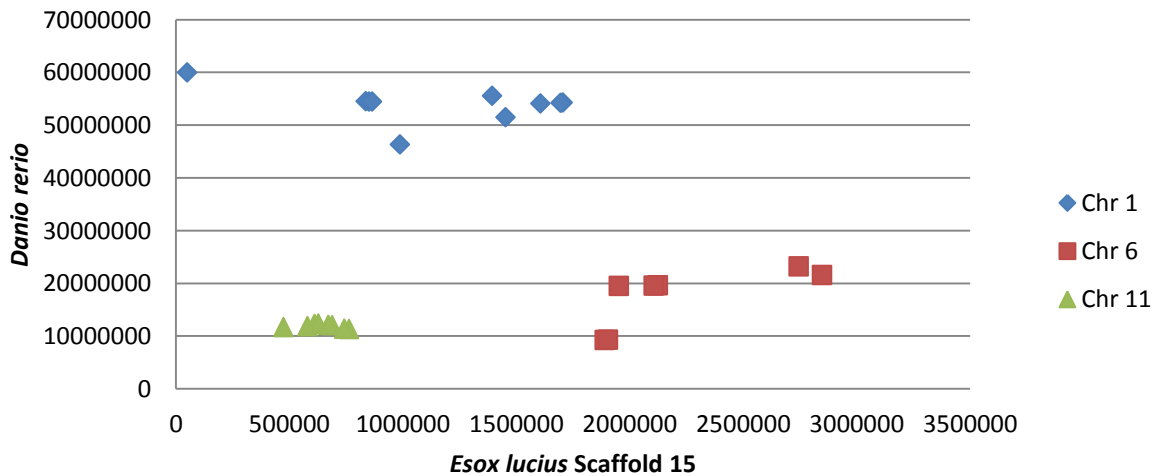



# Scaffold 16

## Scaffold 16 - *G. aculeatus* v. *E. lucius*

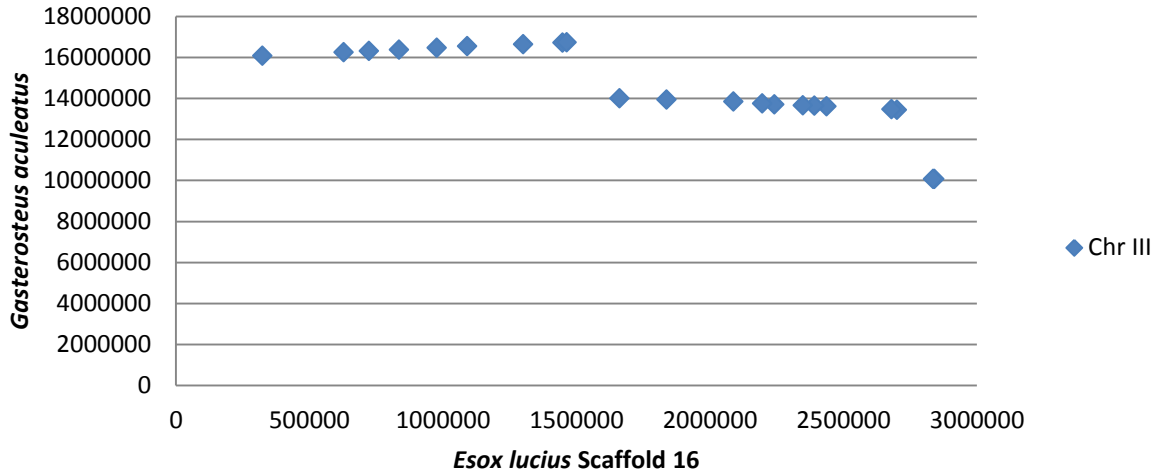

## Scaffold 16 - *O. latipes* v. *E. lucius*

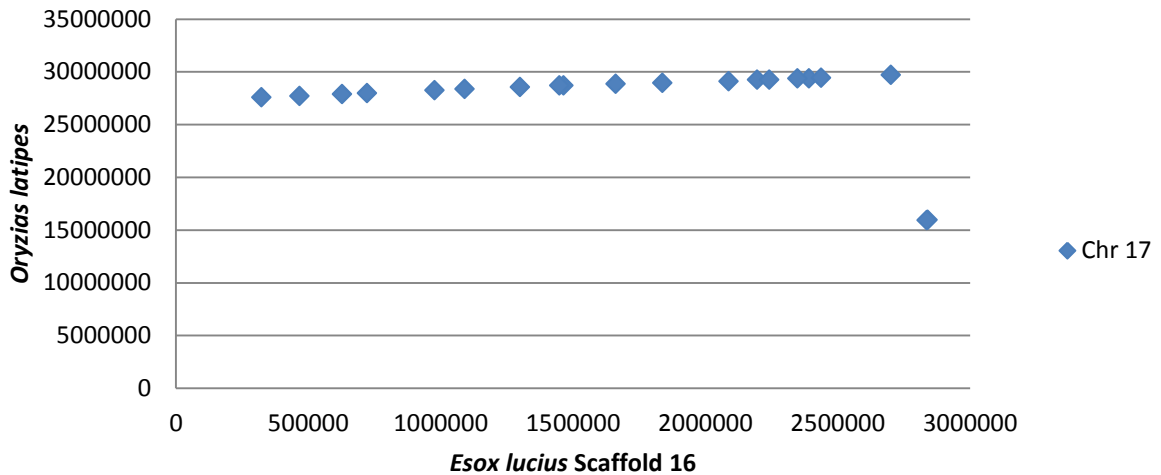

## Scaffold 16 - *D. rerio* v. *E. lucius*

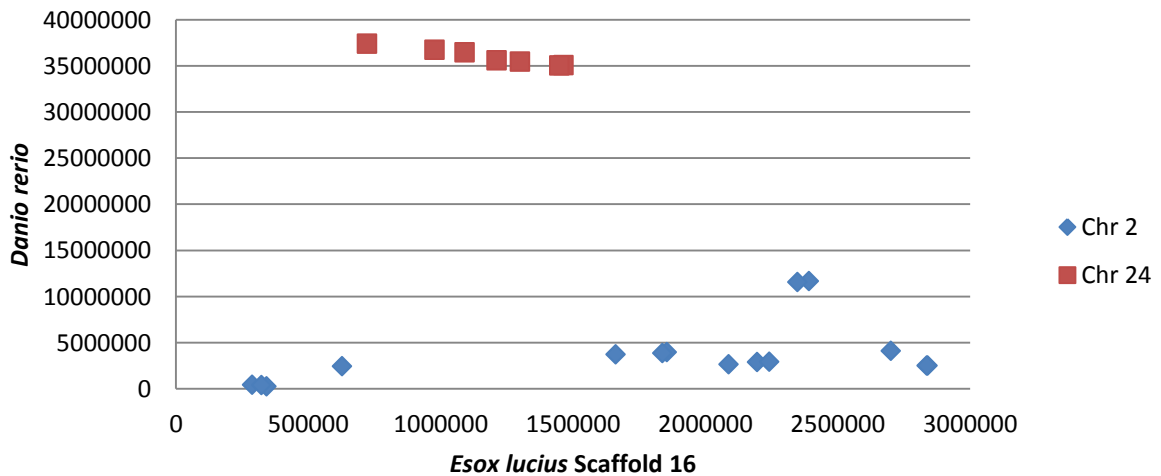

# Scaffold 17

## Scaffold 17 - *G. aculeatus* v. *E. lucius*

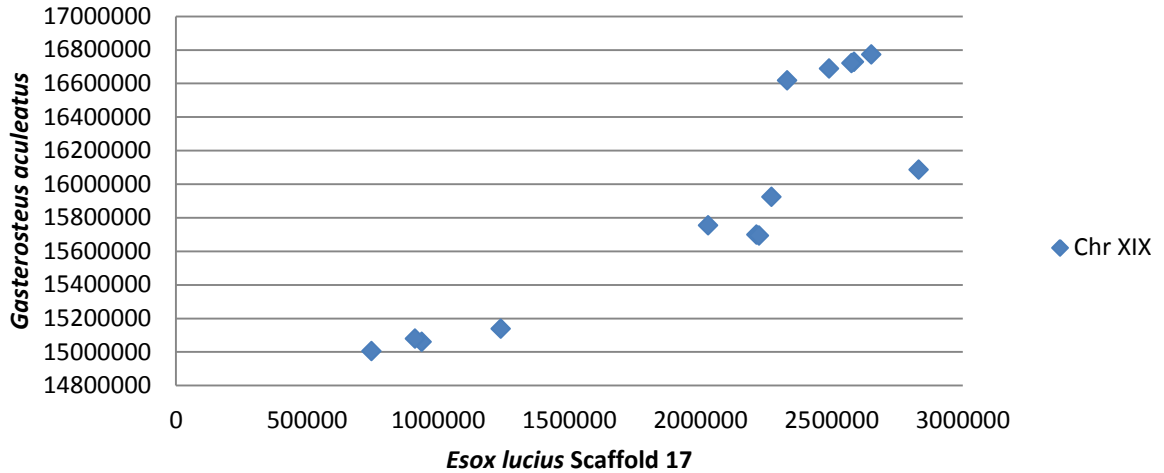

## Scaffold 17 - *O. latipes* v. *E. lucius*

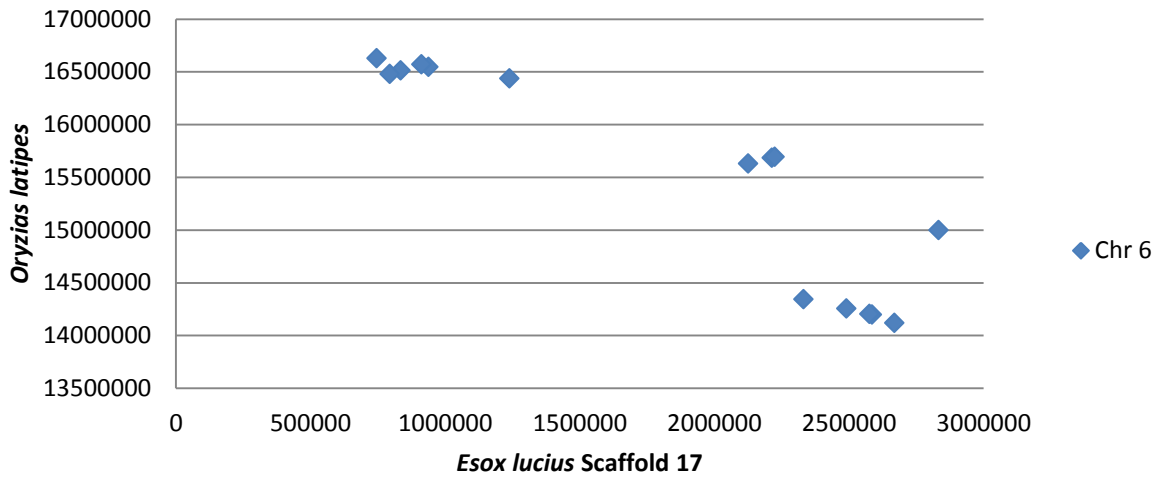

## Scaffold 17 - *D. rerio* v. *E. lucius*

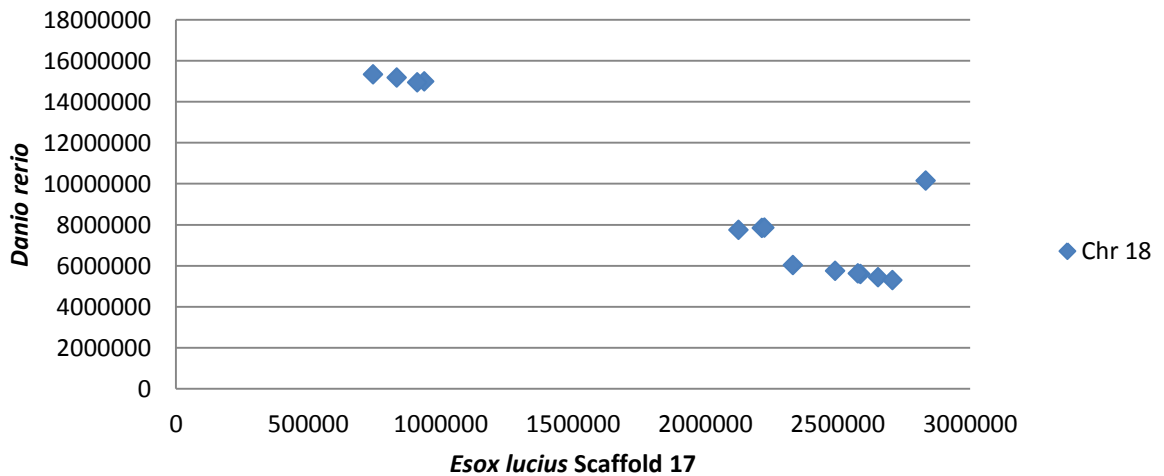

# Scaffold 18

## Scaffold 18 - *G. aculeatus* v. *E. lucius*

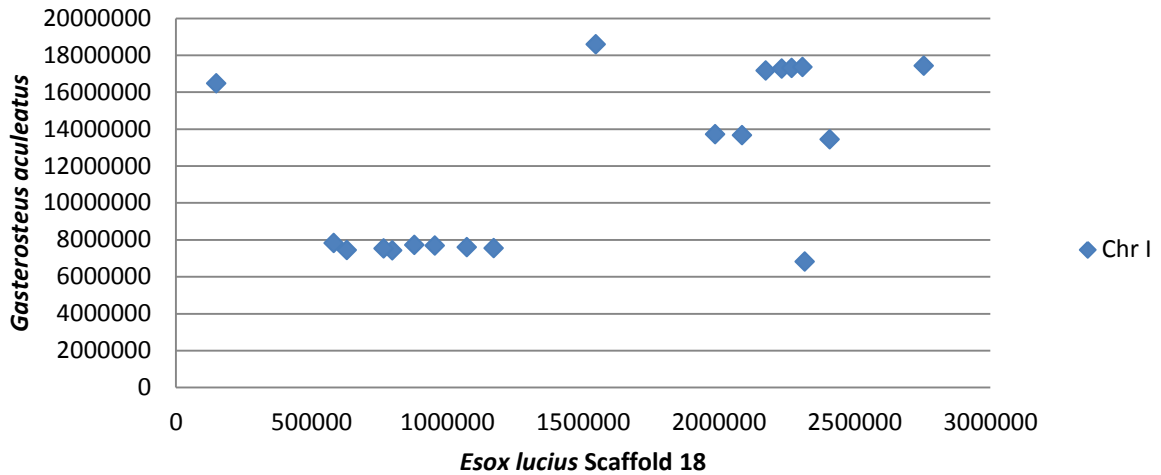

## Scaffold 18 - *O. latipes* v. *E. lucius*

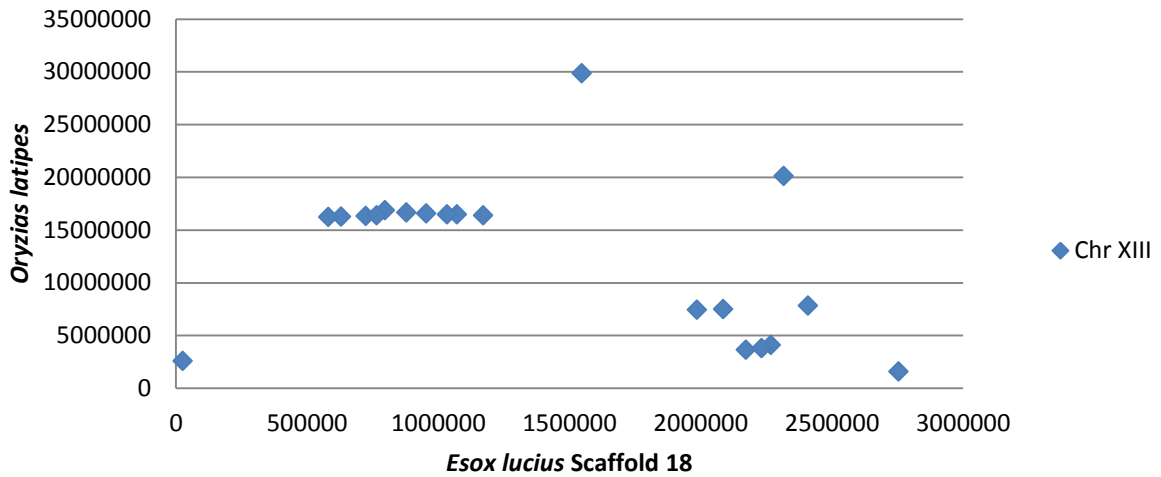

## Scaffold 18 - *D. rerio* v. *E. lucius*

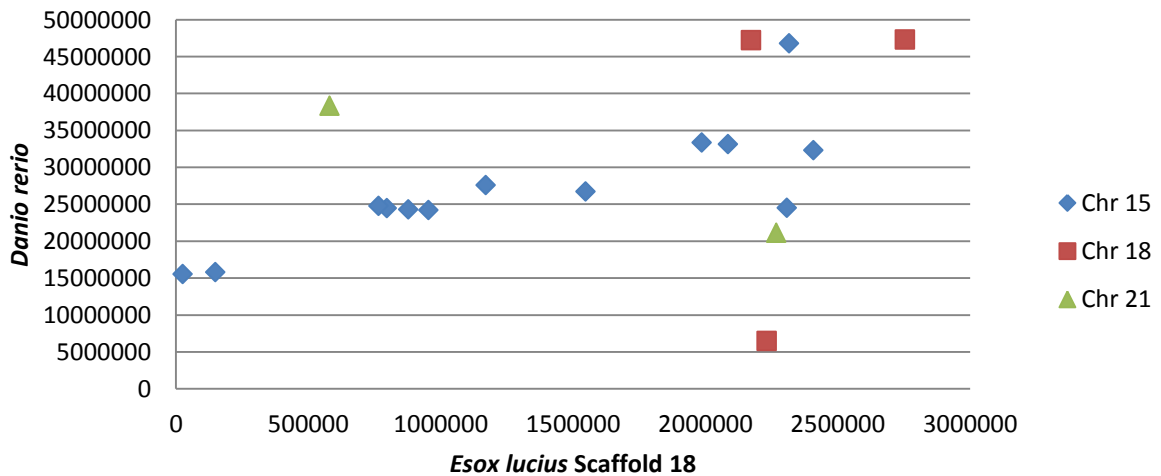

# Scaffold 19

## Scaffold 19 - *G. aculeatus* v. *E. lucius*

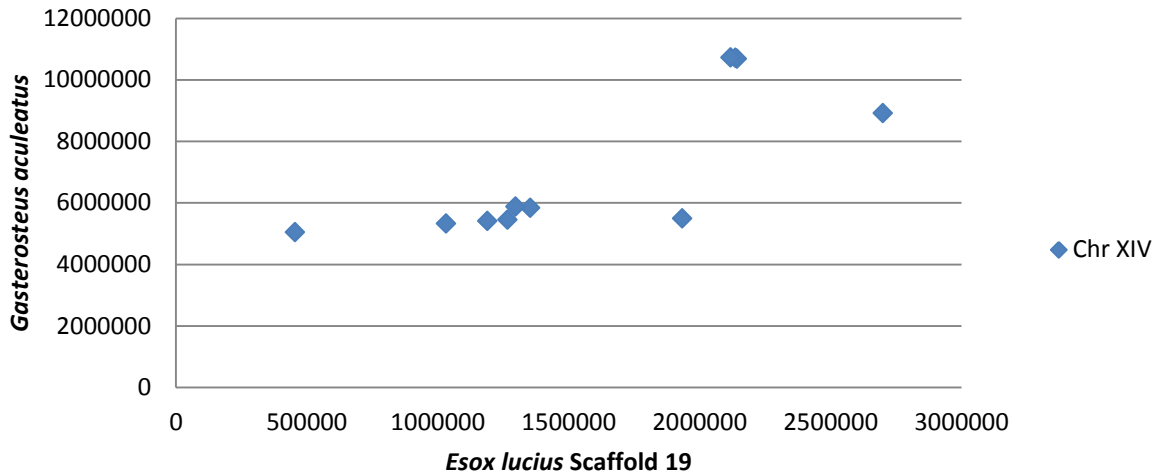

## Scaffold 19 - *O. latipes* v. *E. lucius*

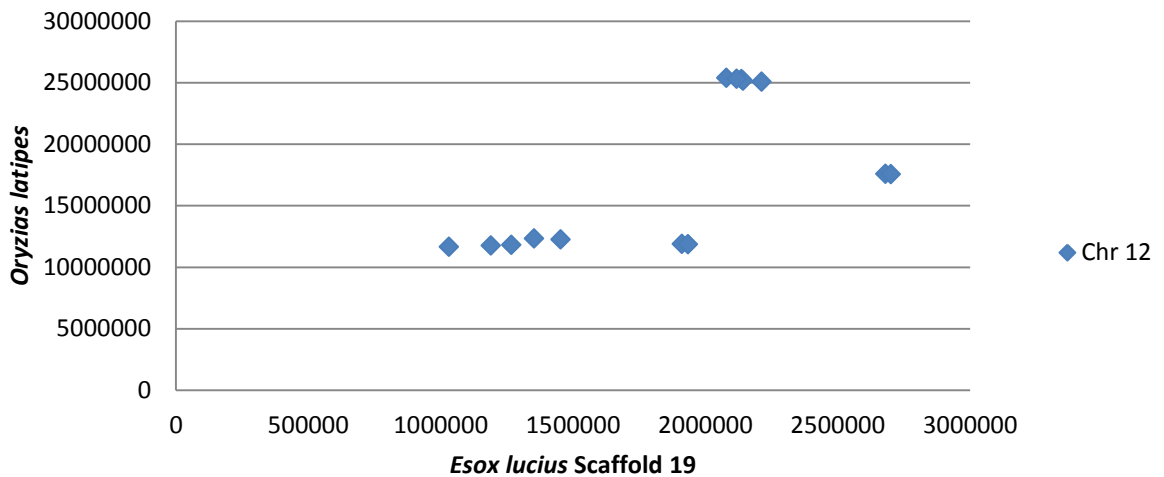

## Scaffold 19 - *D. rerio* v. *E. lucius*

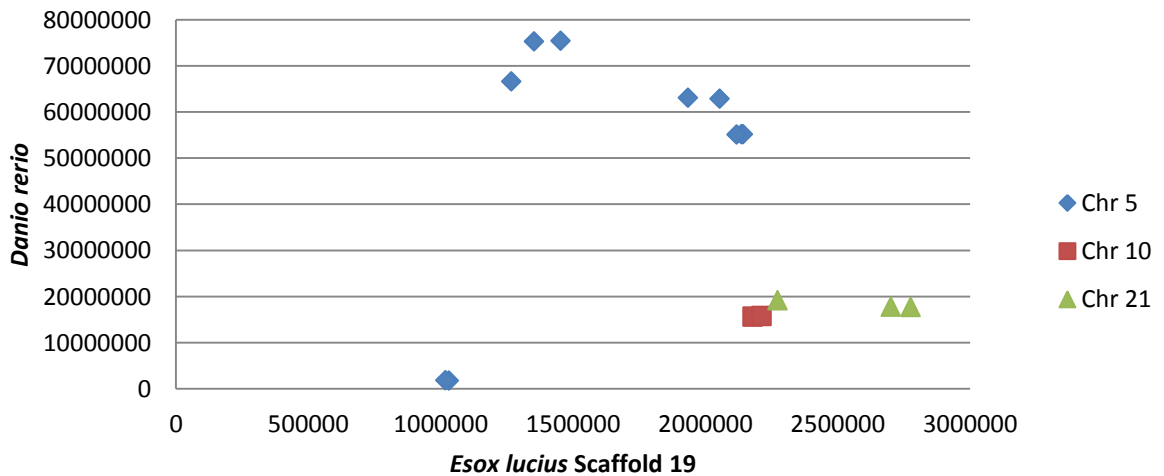

# Scaffold 20

## Scaffold 20 - *G. aculeatus* v. *E. lucius*

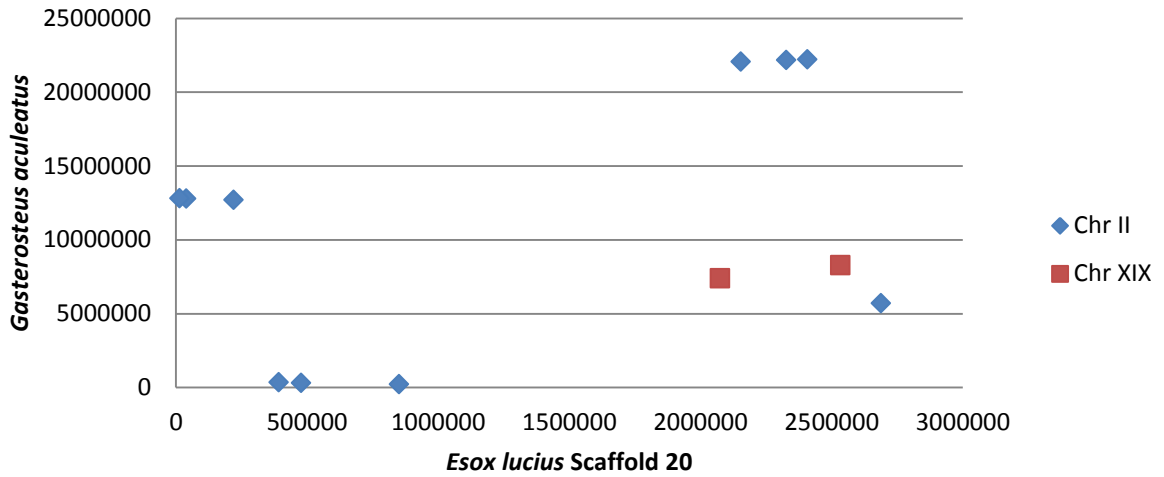

## Scaffold 20 - *O. latipes* v. *E. lucius*

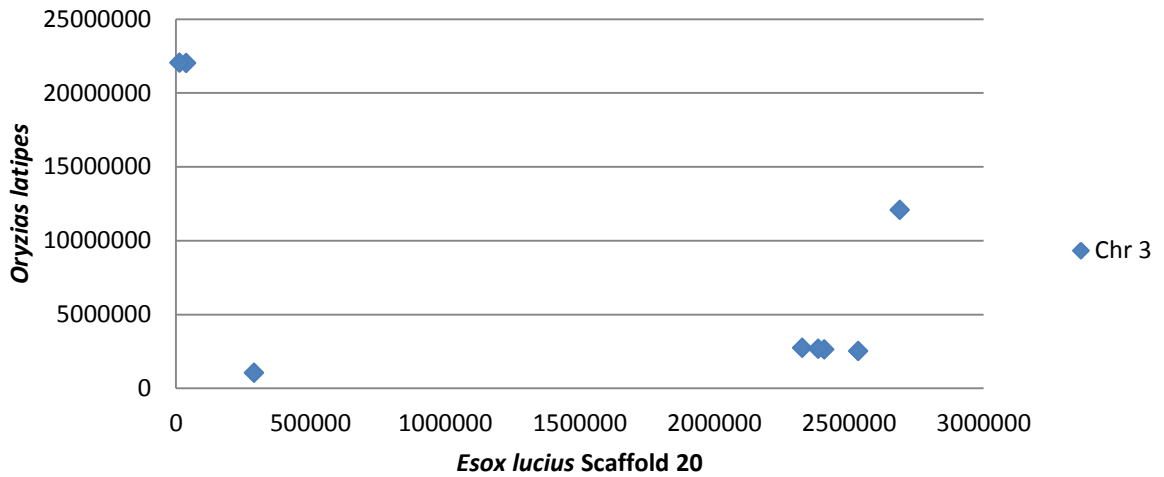

## Scaffold 20 - *D. rerio* v. *E. lucius*

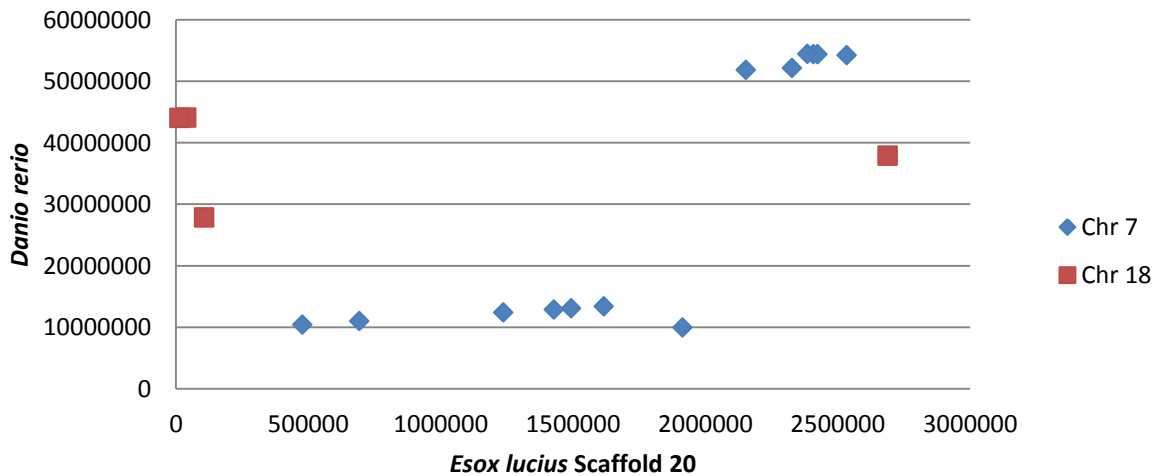

# Scaffold 21

## Scaffold 21 - *G. aculeatus* v. *E. lucius*

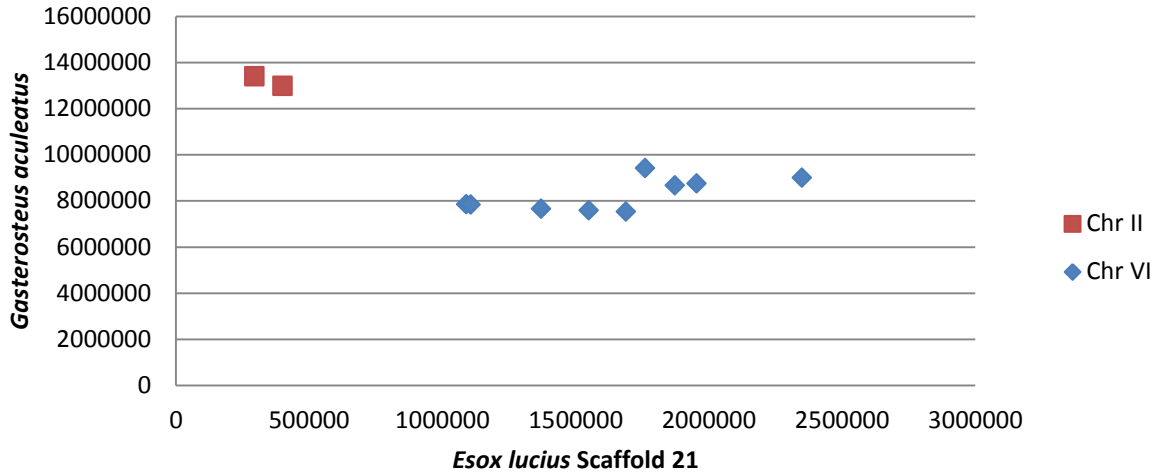

## Scaffold 21 - *O. latipes* v. *E. lucius*

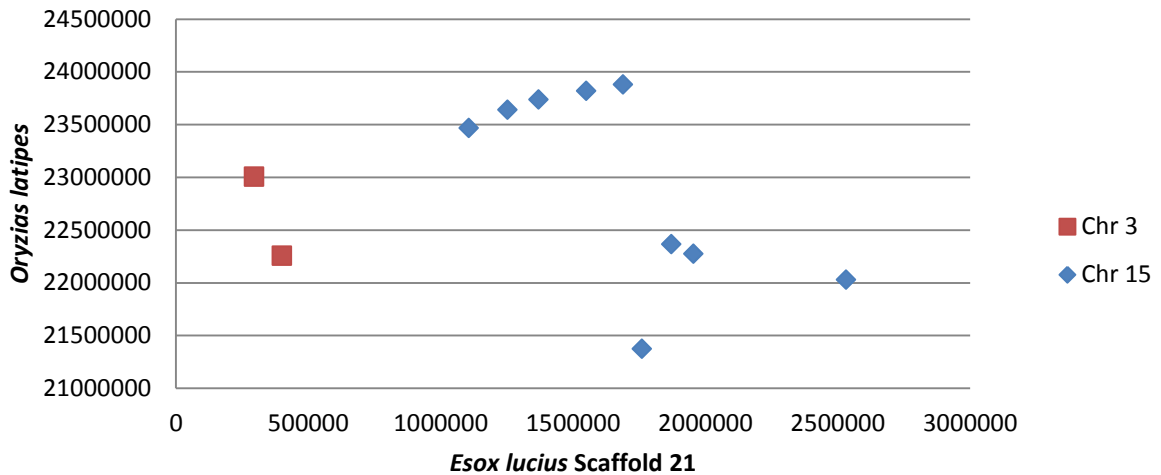

## Scaffold 21 - *D. rerio* v. *E. lucius*

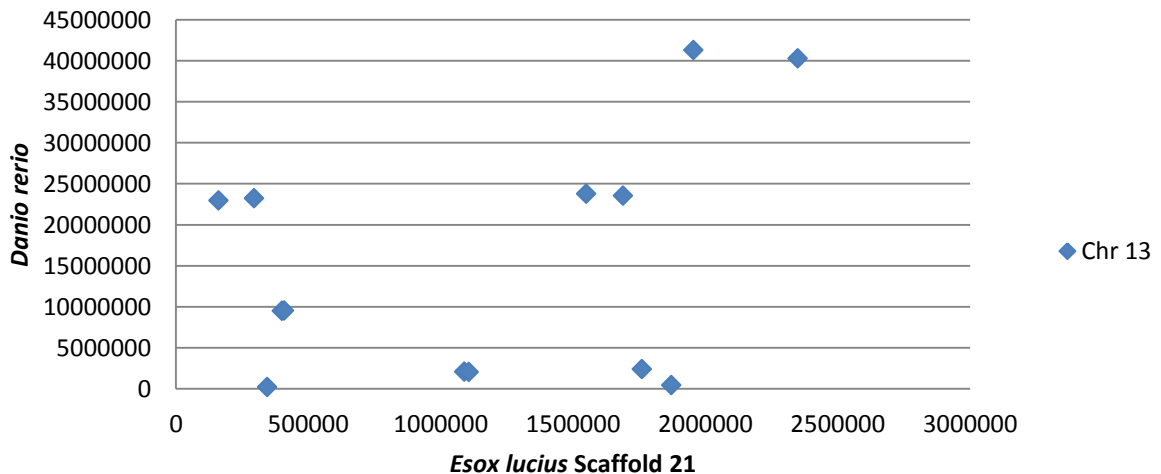

# Scaffold 22

## Scaffold 22 - *G. aculeatus* v. *E. lucius*

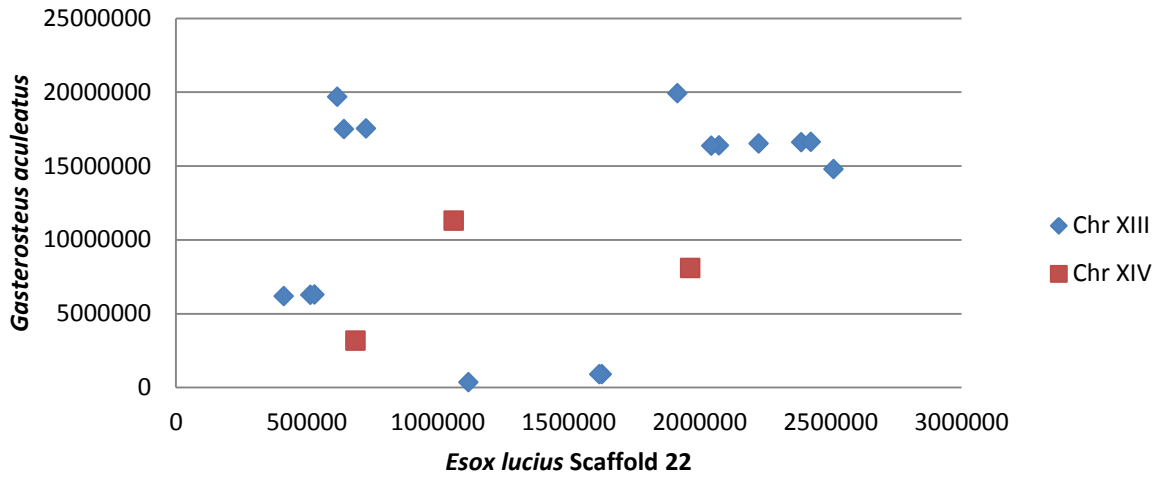

## Scaffold 22 - *O. latipes* v. *E. lucius*

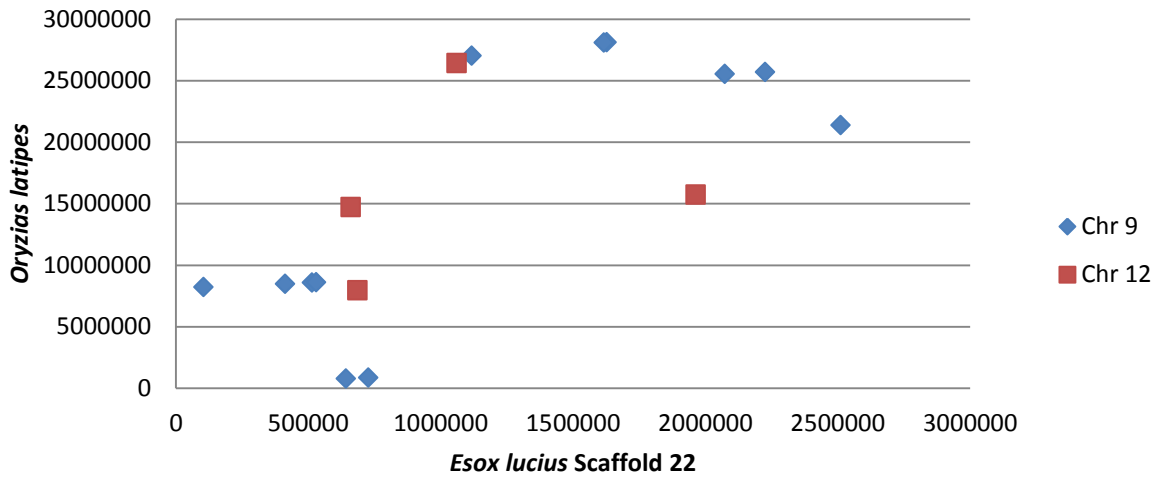

## Scaffold 22 - *D. rerio* v. *E. lucius*

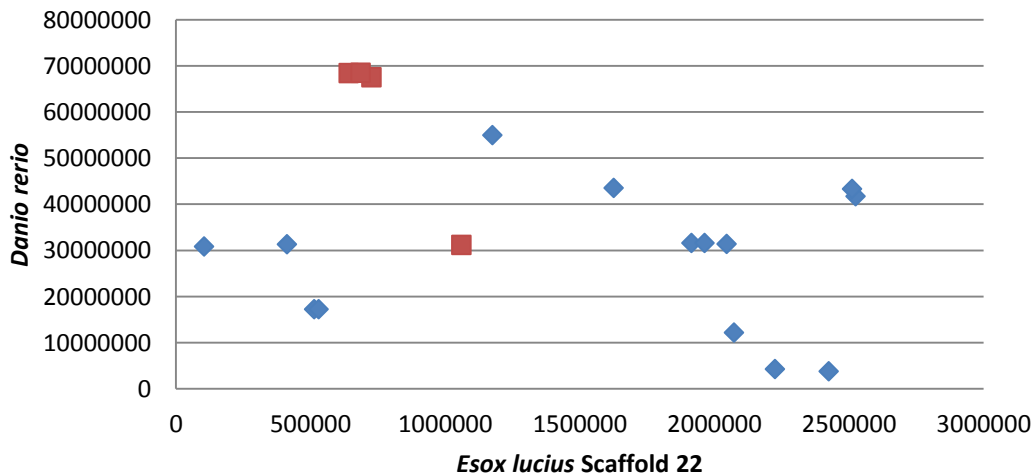

# Scaffold 23

## Scaffold 23 - *G. aculeatus* v. *E. lucius*

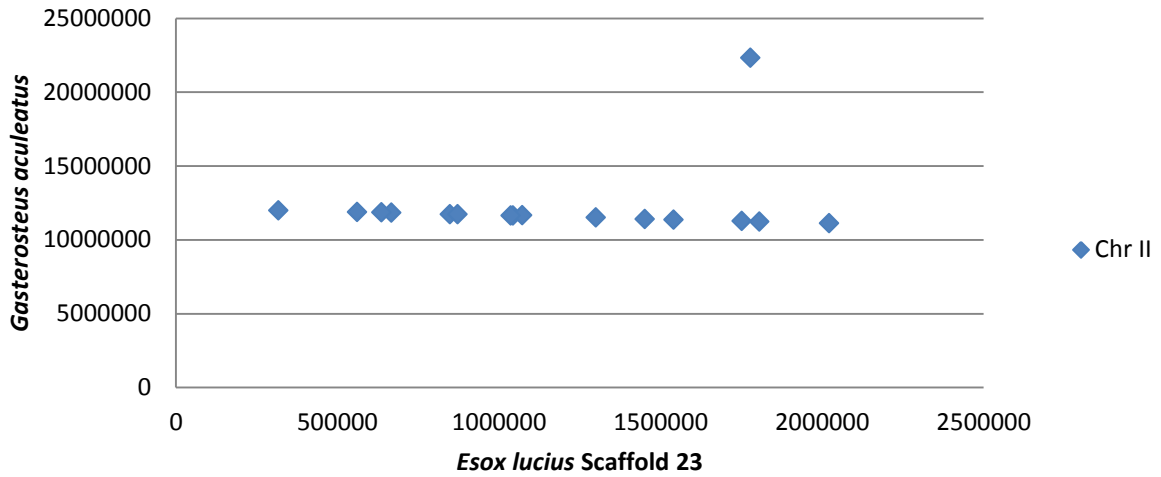

## Scaffold 23 - *O. latipes* v. *E. lucius*

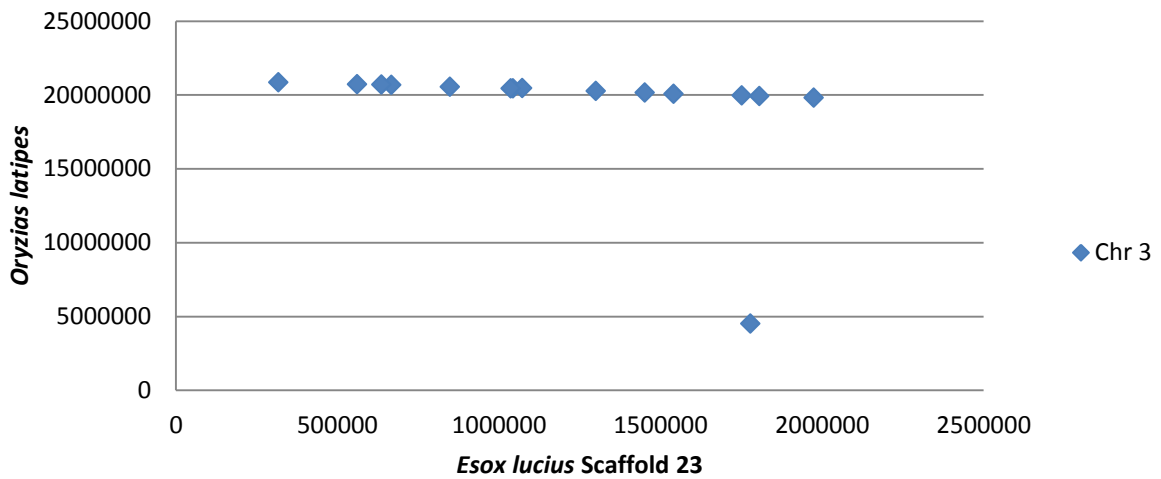

## Scaffold 23 - *D. rerio* v. *E. lucius*

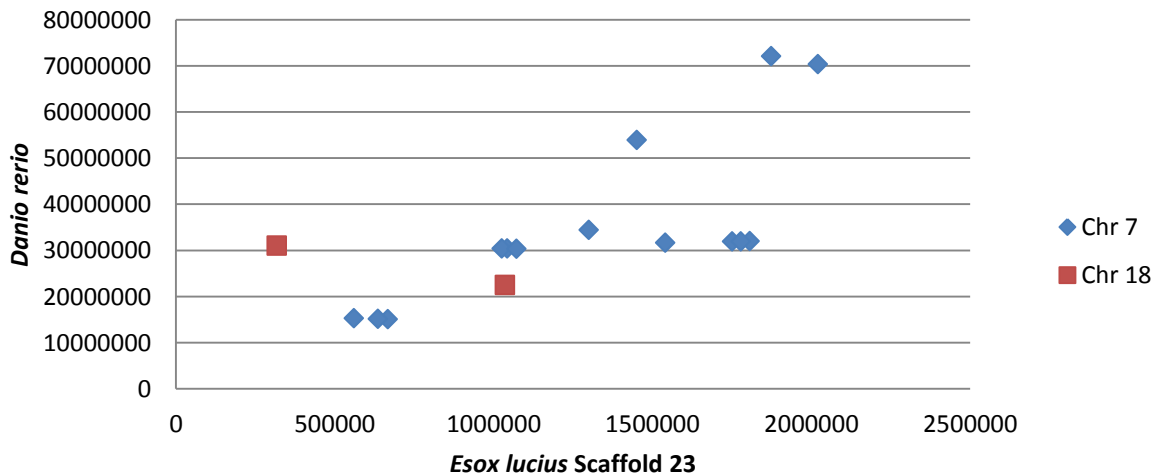



# Scaffold 24

## Scaffold 24 - *G. aculeatus* v. *E. lucius*

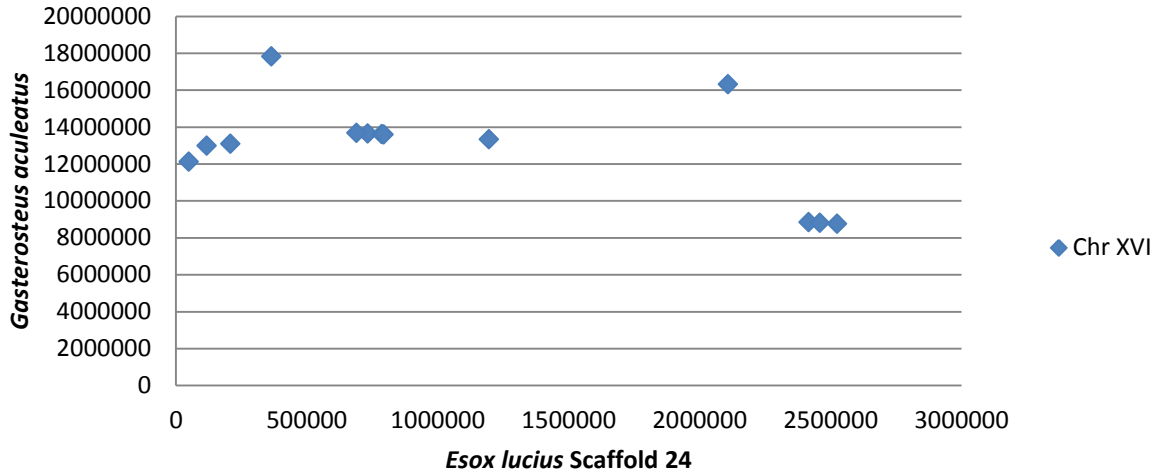

## Scaffold 24 - *O. latipes* v. *E. lucius*

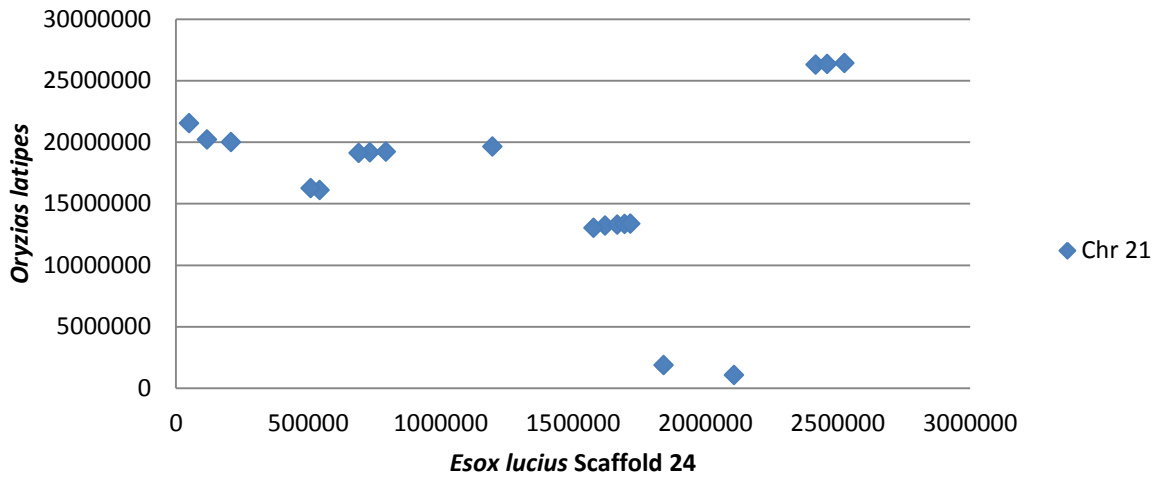

## Scaffold 24 - *D. rerio* v. *E. lucius*

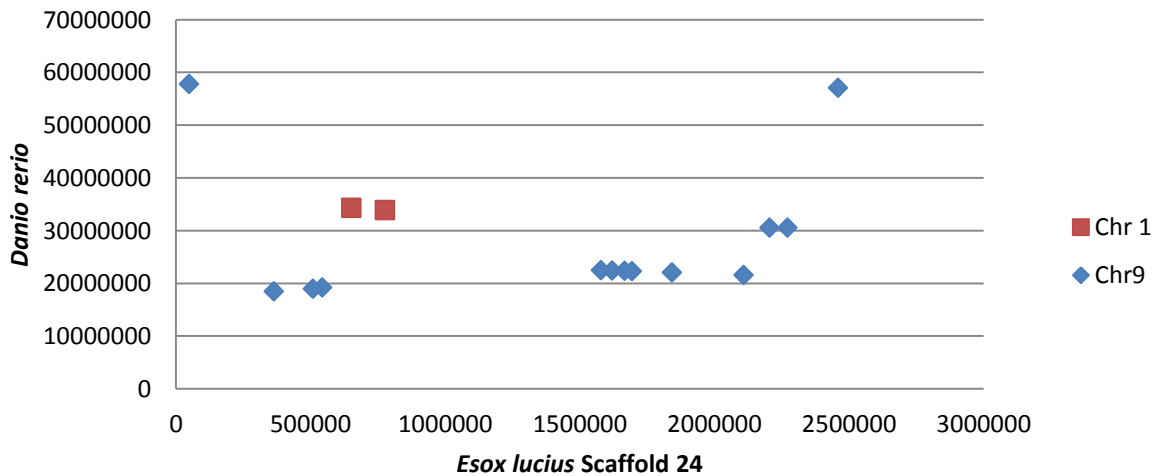

# Scaffold 25

## Scaffold 25 - *G. aculeatus* v. *E. lucius*

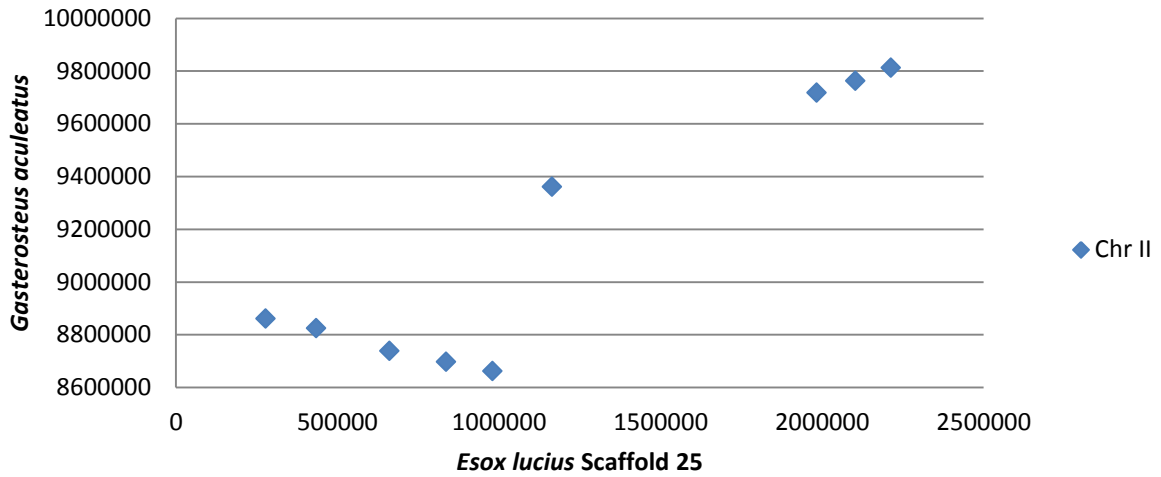

## Scaffold 25 - *O. latipes* v. *E. lucius*

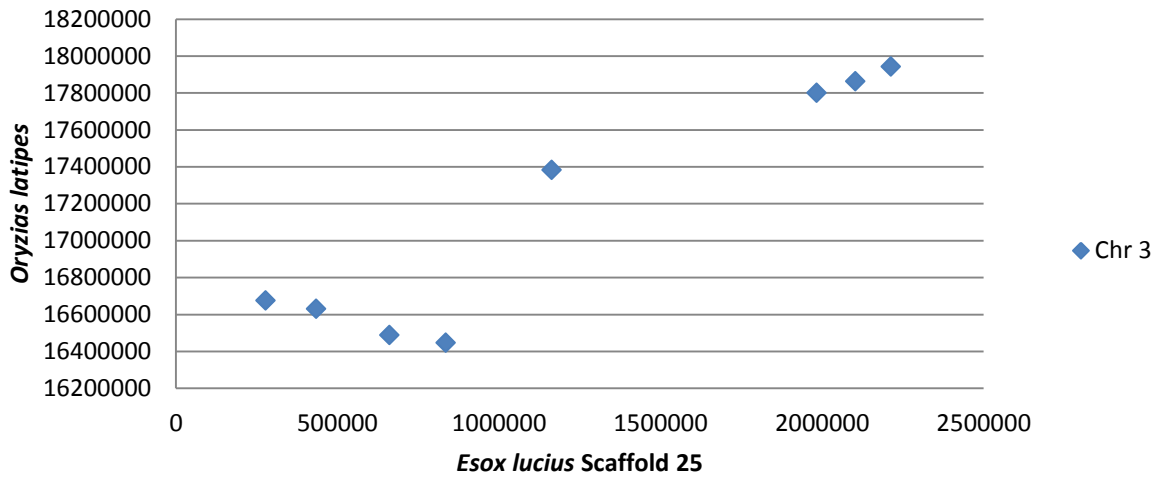

## Scaffold 25 - *D. rerio* v. *E. lucius*

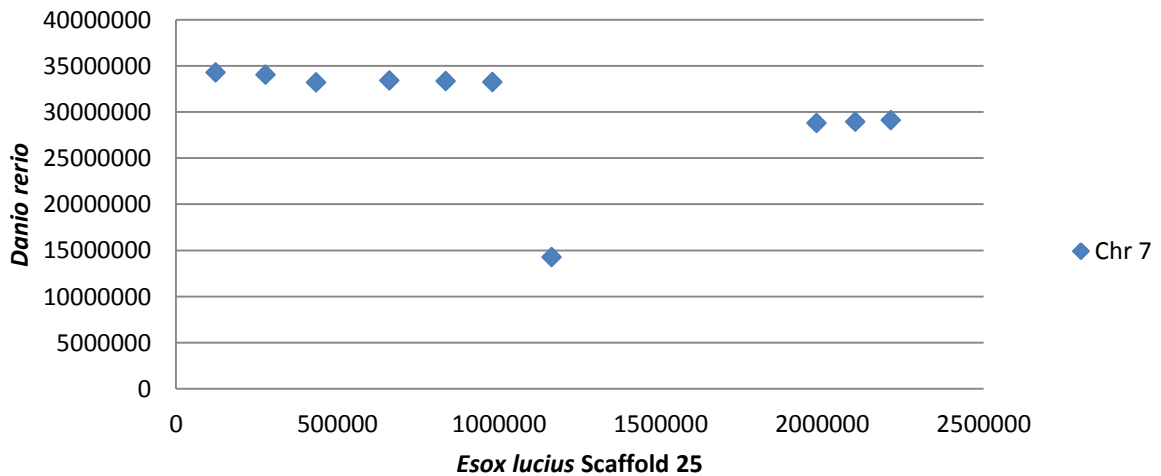

# Scaffold 26

## Scaffold 26 - *G. aculeatus* v. *E. lucius*

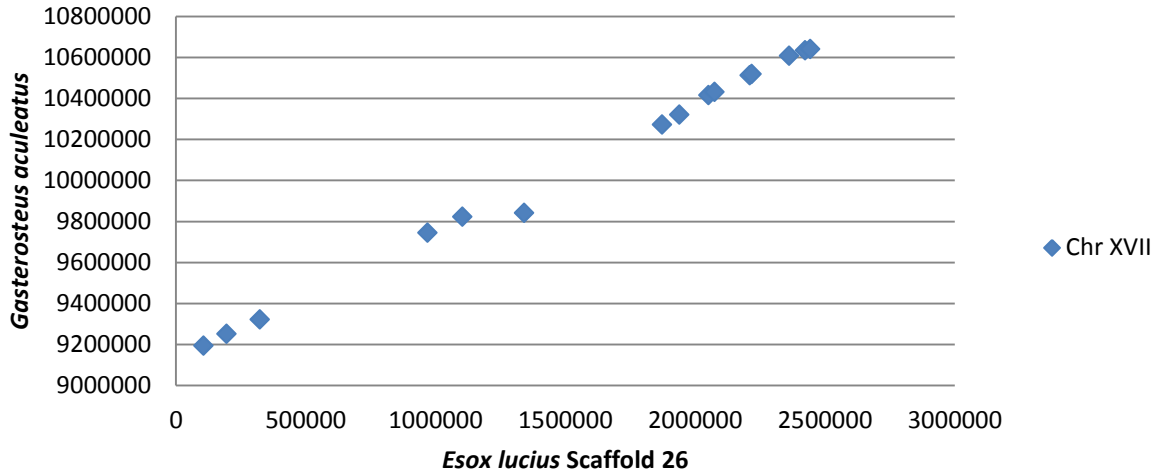

## Scaffold 26 - *O. latipes* v. *E. lucius*

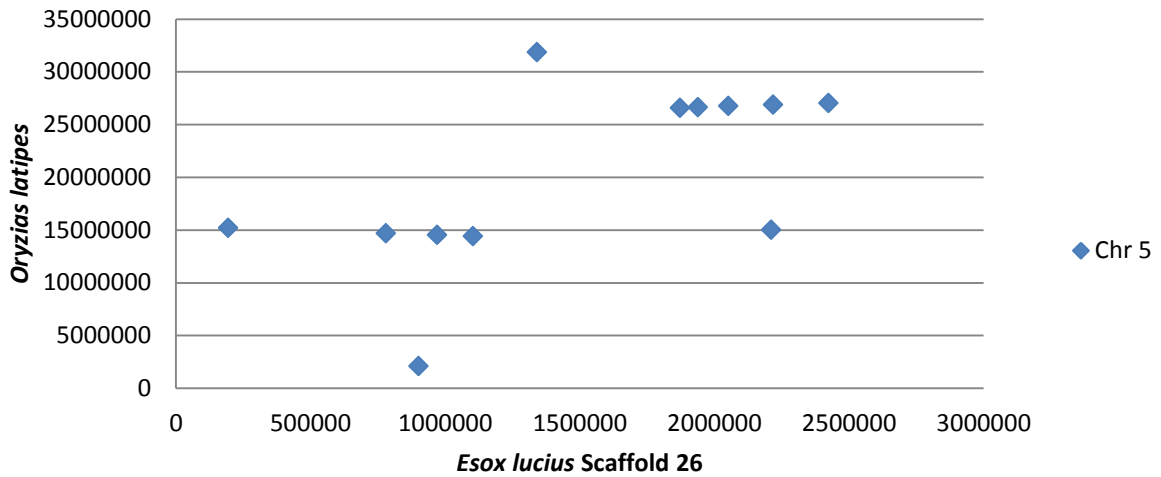

## Scaffold 26 - *D. rerio* v. *E. lucius*

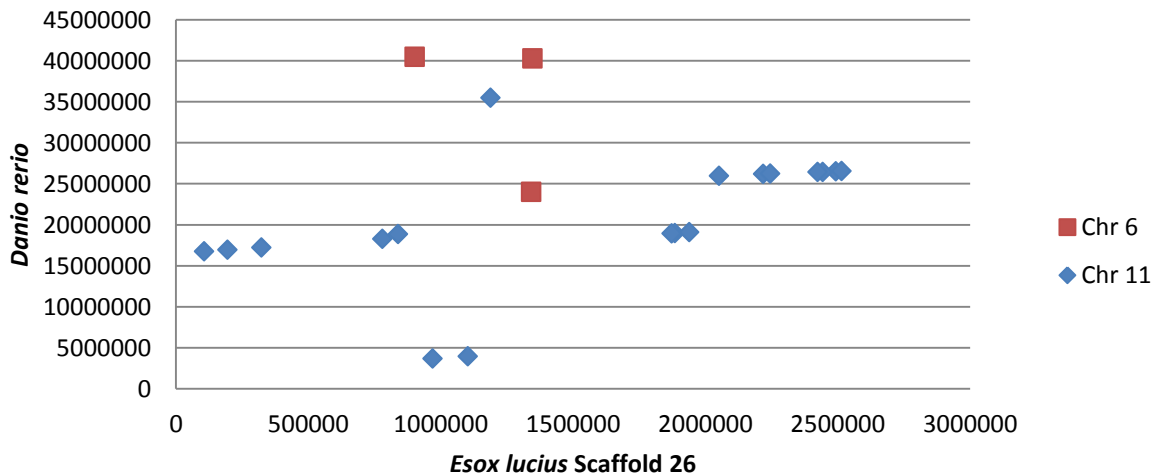

# Scaffold 27

## Scaffold 27 - *G. aculeatus* v. *E. lucius*

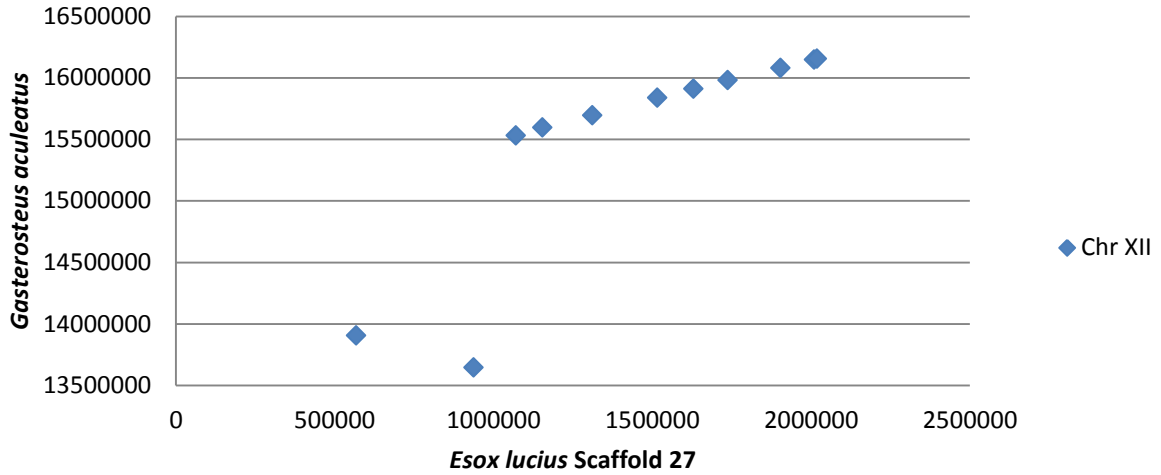

## Scaffold 27 - *O. latipes* v. *E. lucius*

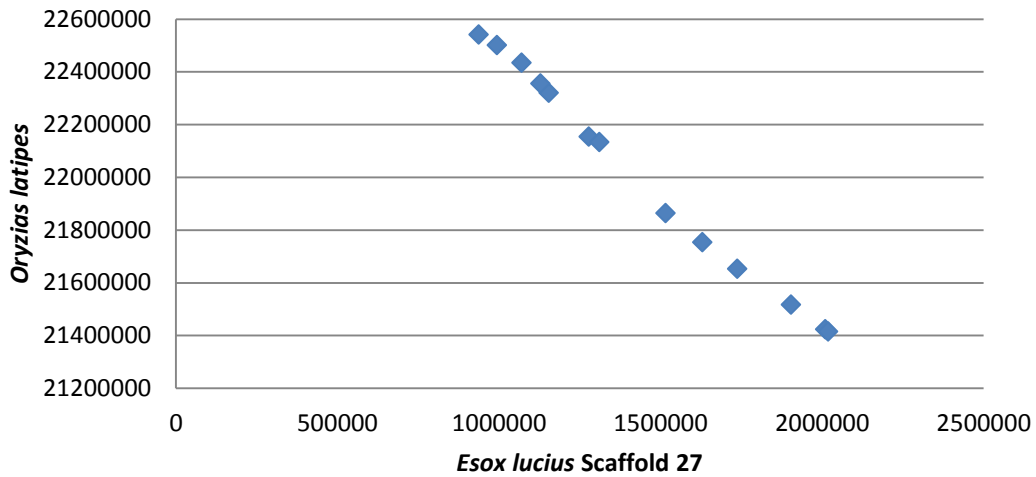

## Scaffold 27 - *D. rerio* v. *E. lucius*

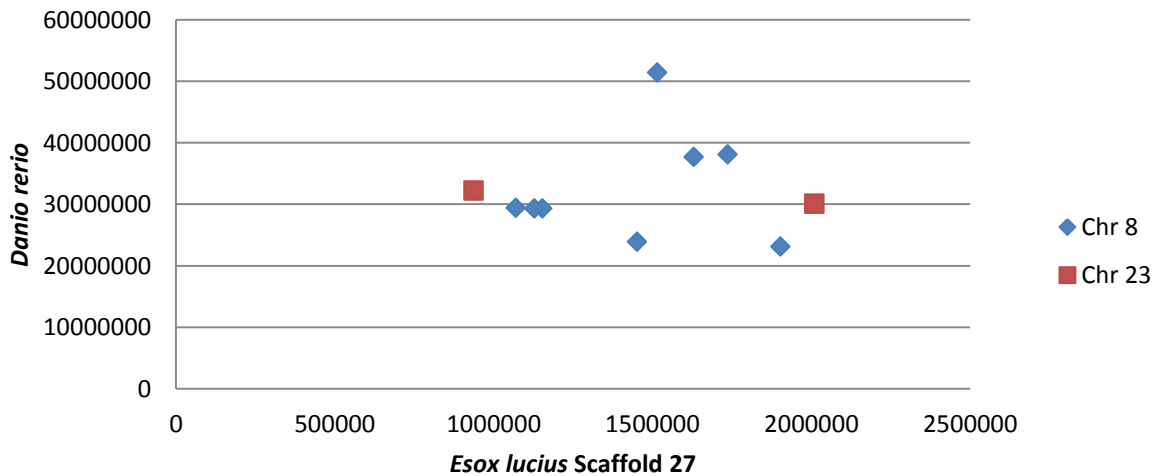

# Scaffold 28

## Scaffold 28 - *G. aculeatus* v. *E. lucius*

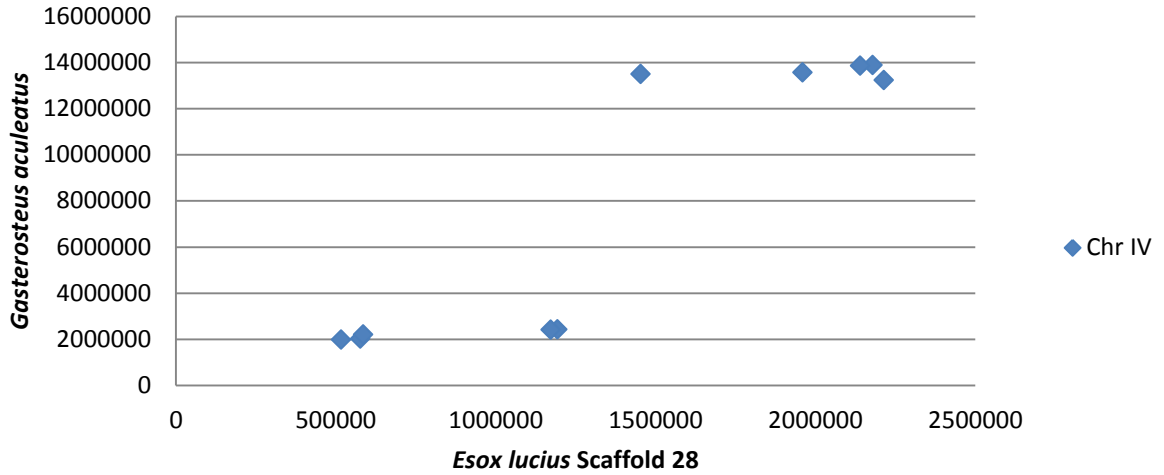

## Scaffold 28 - *O. latipes* v. *E. lucius*

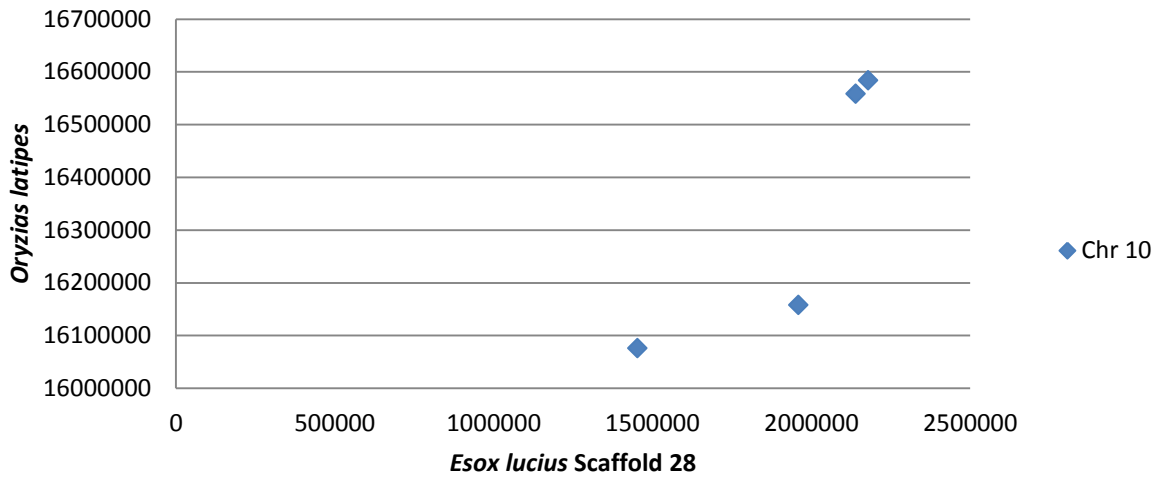

## Scaffold 28 - *D. rerio* v. *E. lucius*

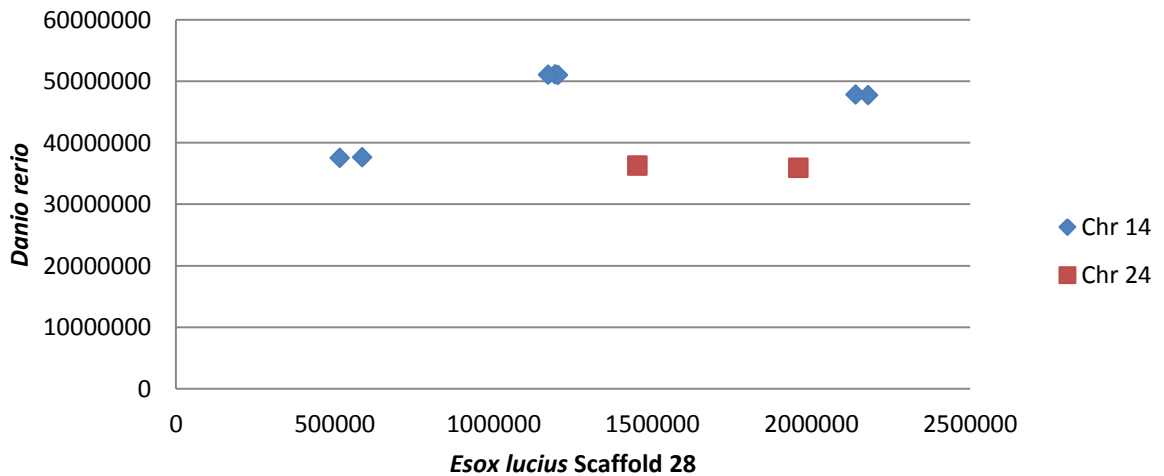

# Scaffold 29

## Scaffold 29 - *G. aculeatus* v. *E. lucius*

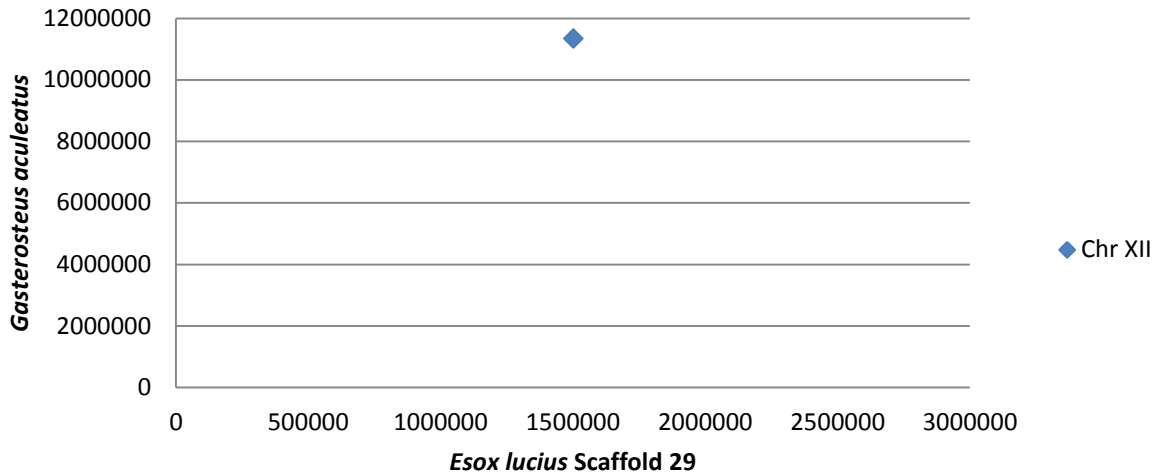

## Scaffold 29 - *O. latipes* v. *E. lucius*

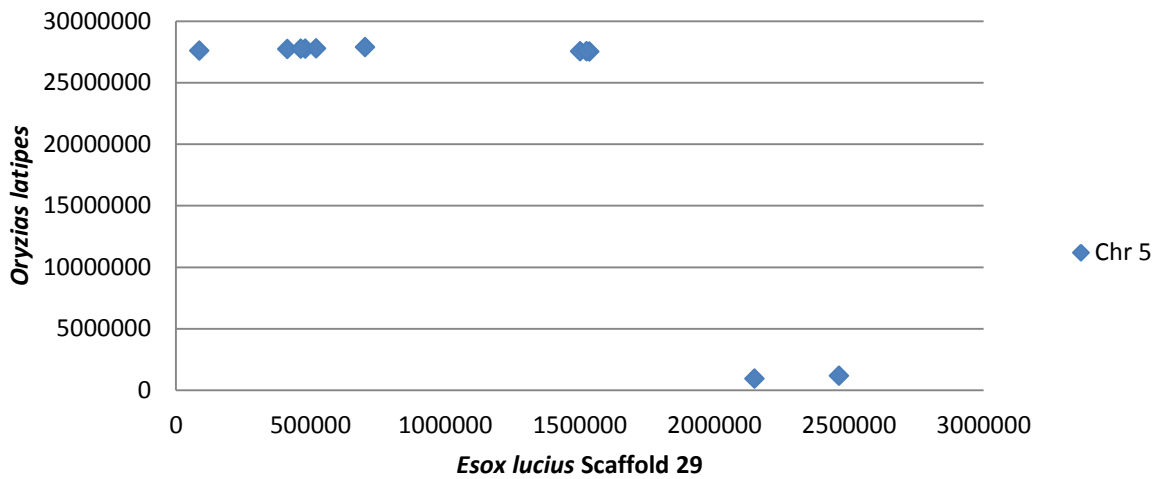

## Scaffold 29 - *D. rerio* v. *E. lucius*

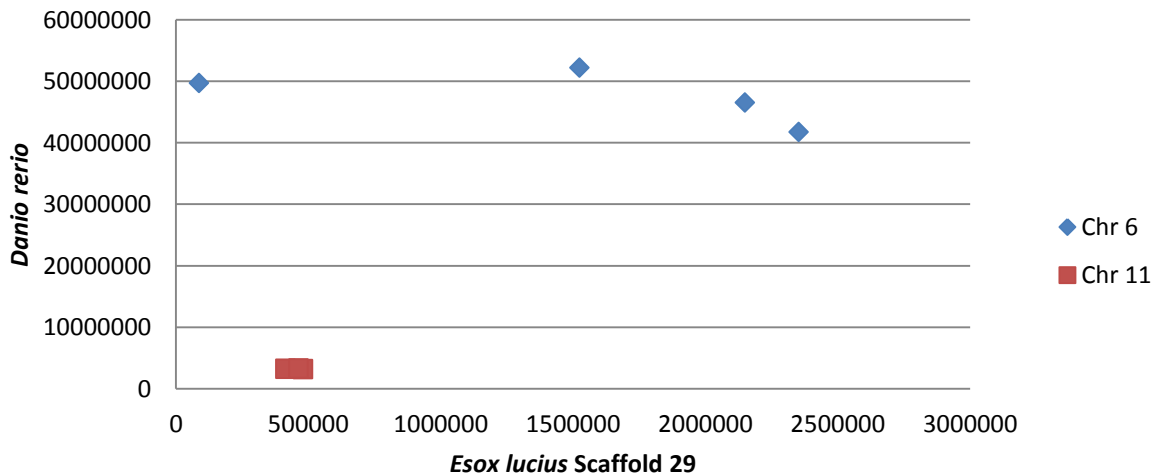

# Scaffold 30

## Scaffold 30 - *G. aculeatus* v. *E. lucius*

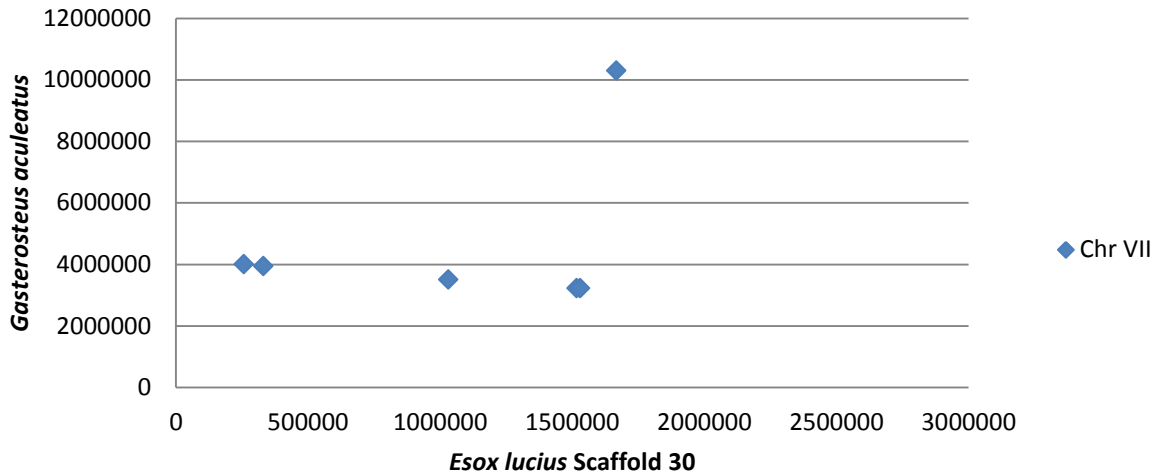

## Scaffold 30 - *O. latipes* v. *E. lucius*

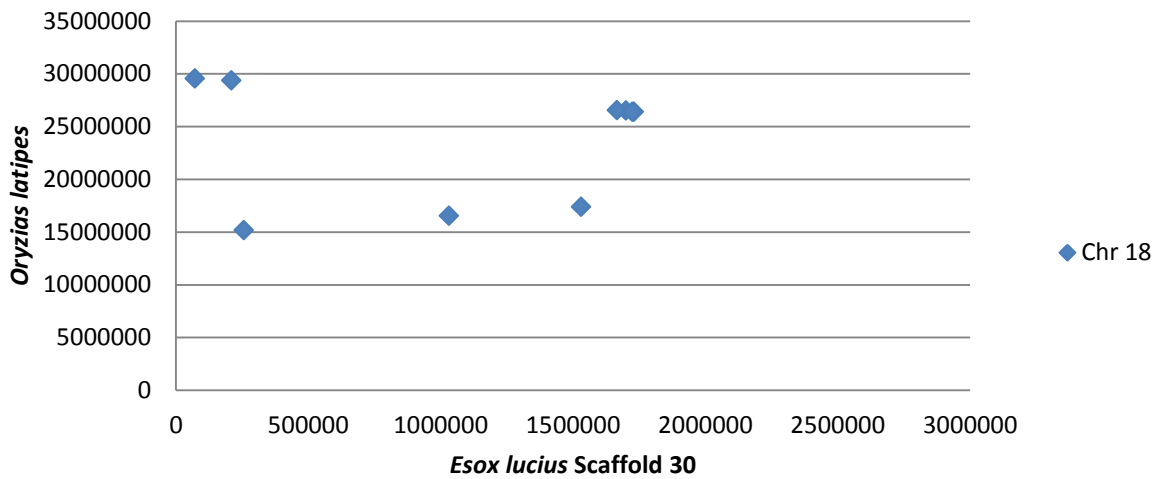

## Scaffold 30 - *D. rerio* v. *E. lucius*

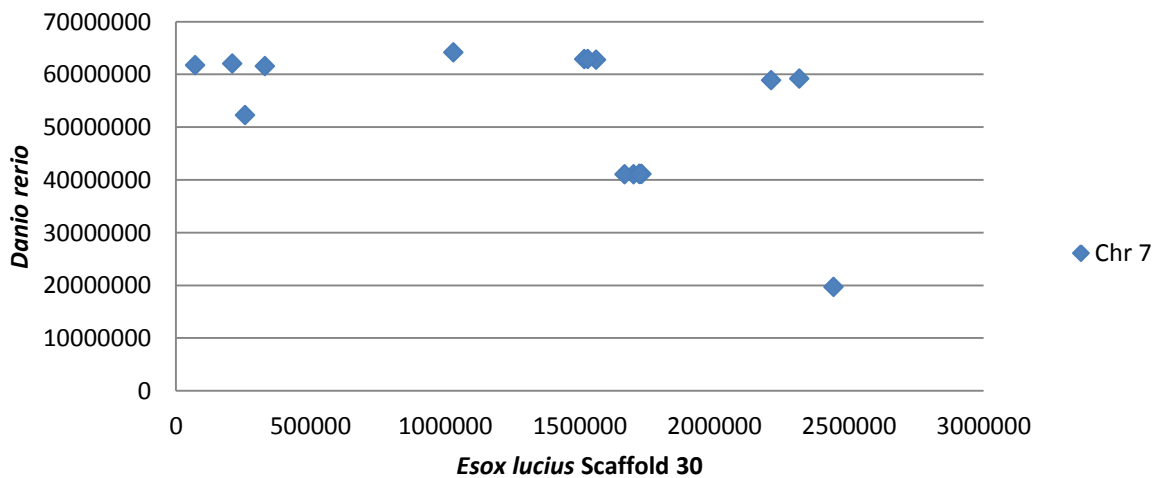

# Scaffold 31

## Scaffold 31 - *G. aculeatus* v. *E. lucius*

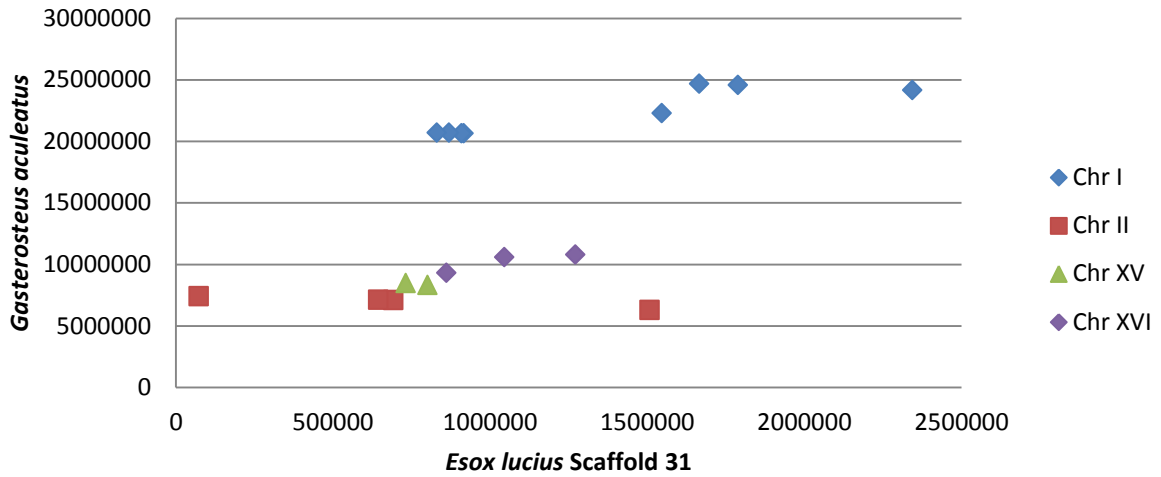

## Scaffold 31 - *O. latipes* v. *E. lucius*

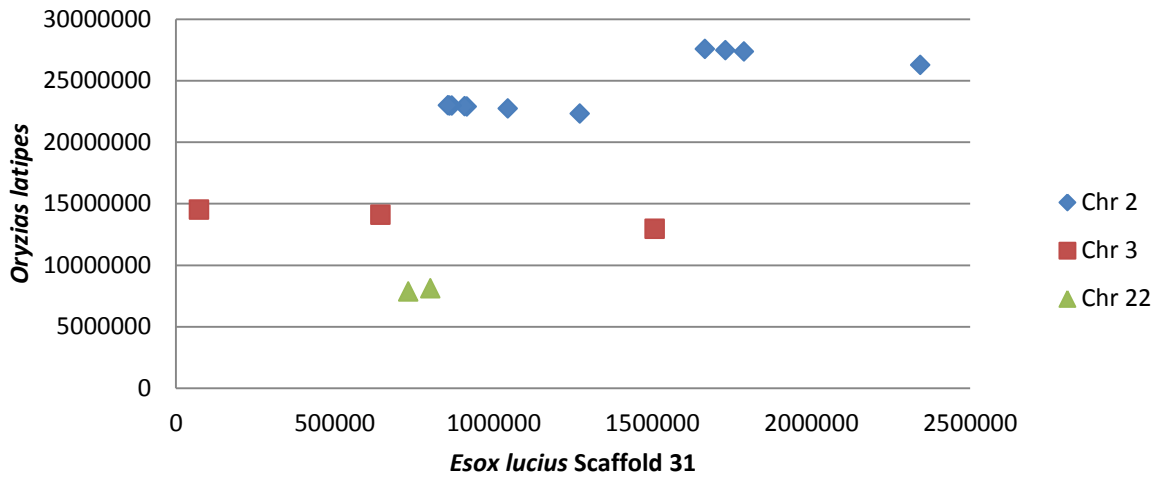

## Scaffold 31 - *D. rerio* v. *E. lucius*

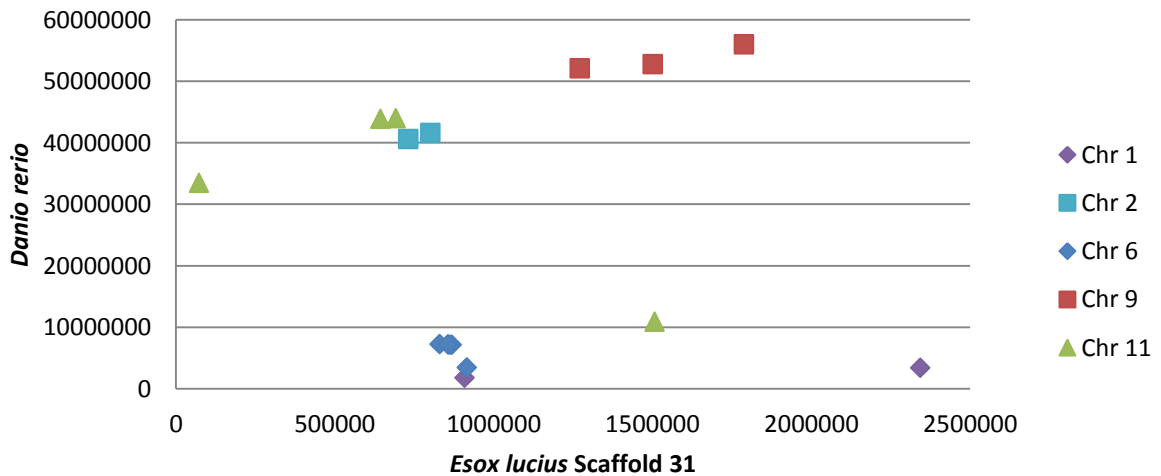



# Scaffold 32

## Scaffold 32 - *G. aculeatus* v. *E. lucius*

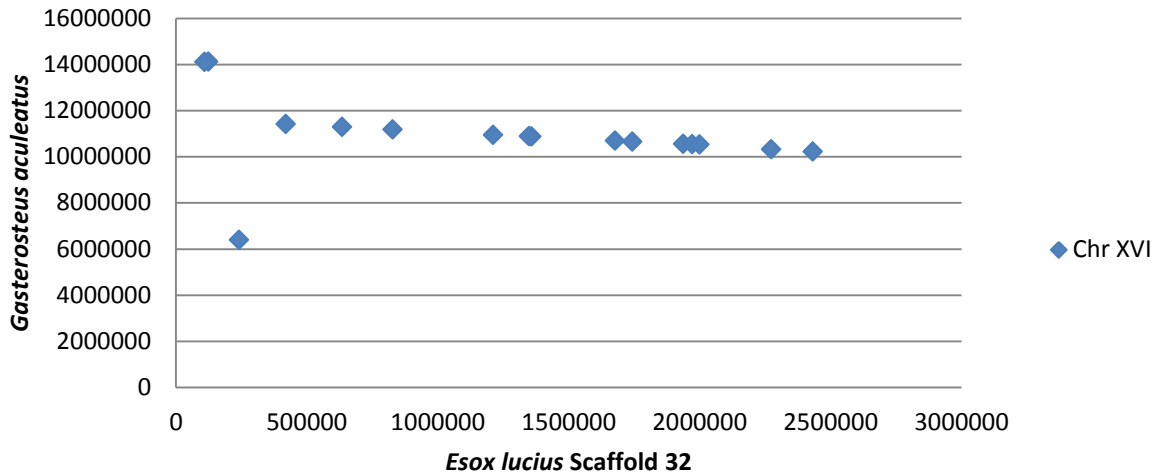

## Scaffold 32 - *O. latipes* v. *E. lucius*

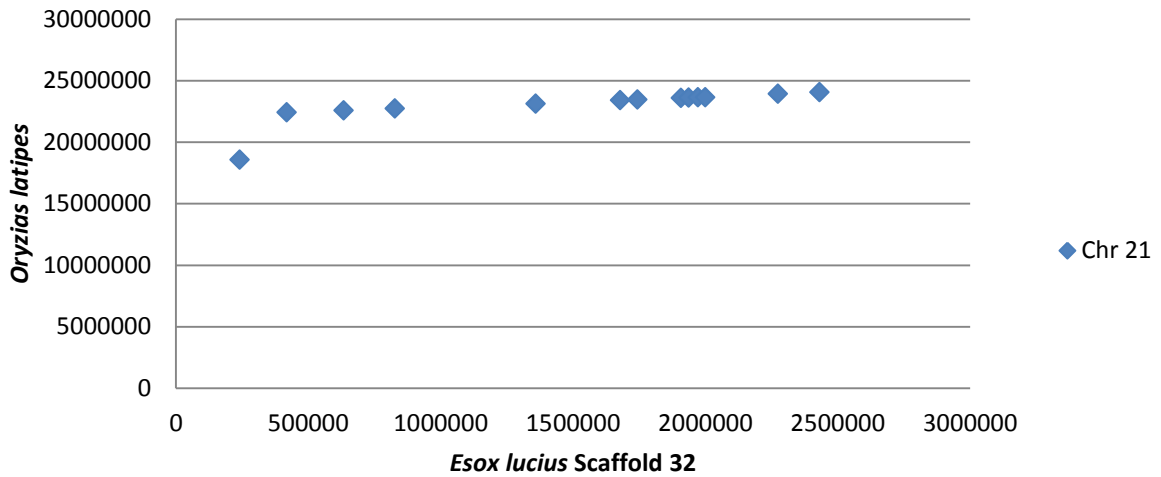

## Scaffold 32 - *D. rerio* v. *E. lucius*

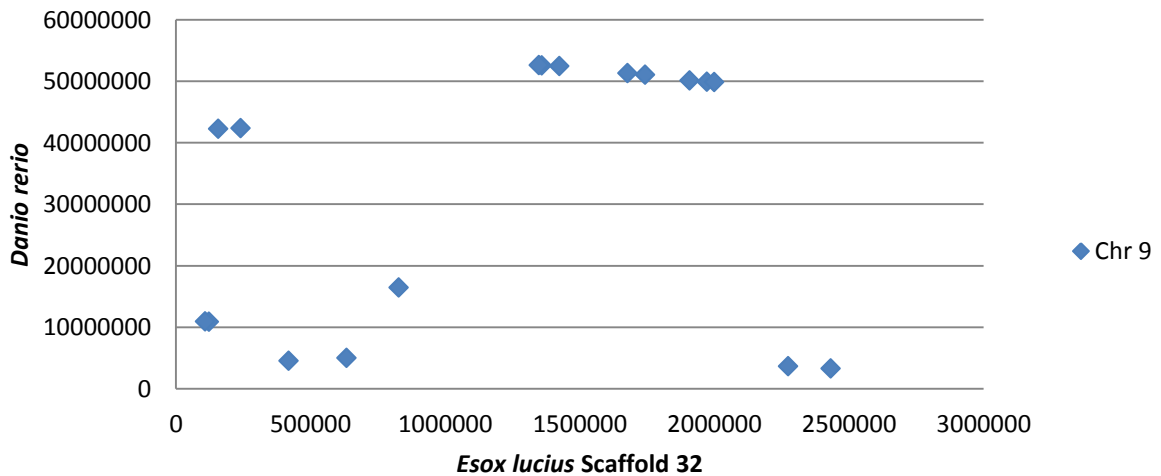

# Scaffold 33

## Scaffold 33 - *G. aculeatus* v. *E. lucius*

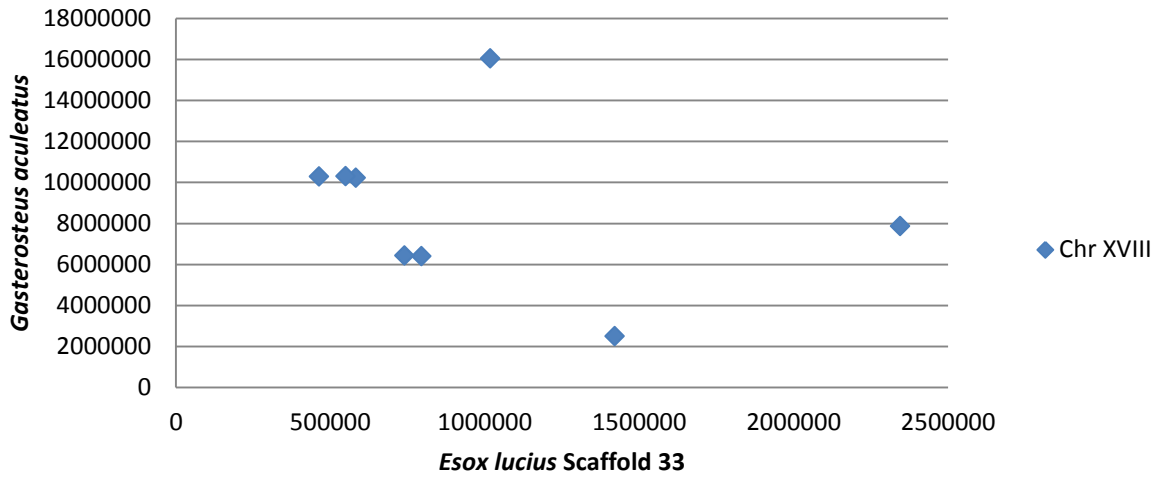

## Scaffold 33 - *O. latipes* v. *E. lucius*

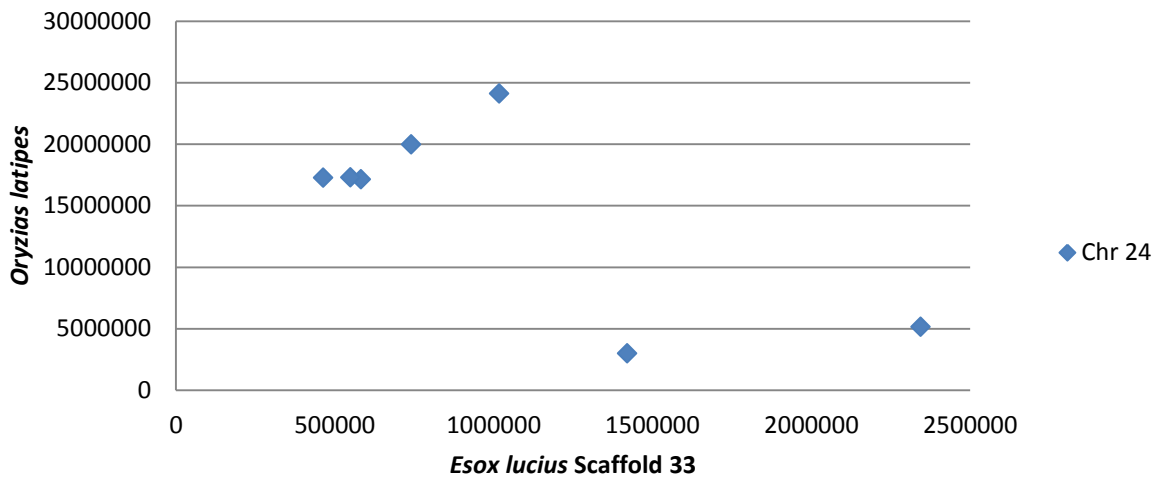

## Scaffold 33 - *D. rerio* v. *E. lucius*

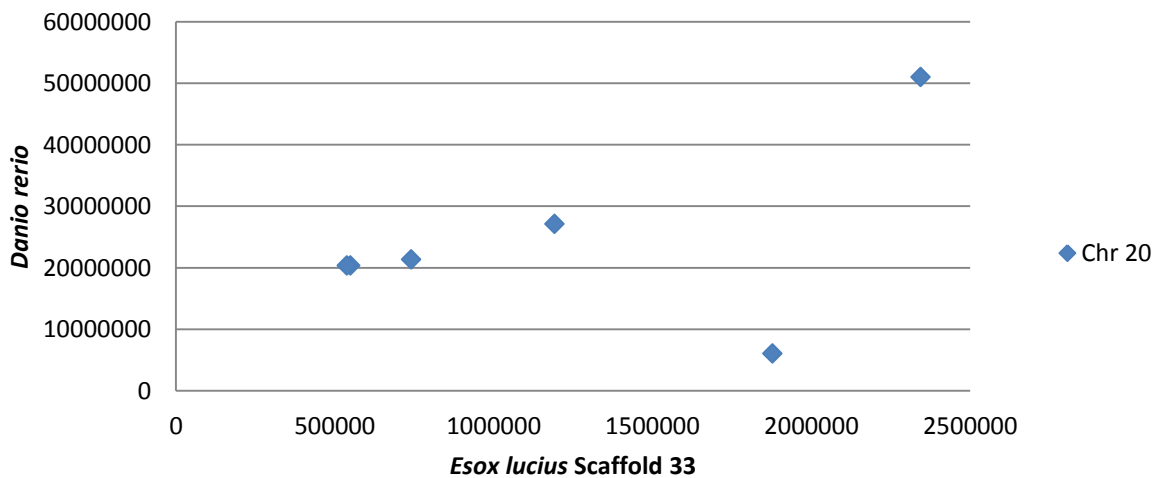

# Scaffold 34

## Scaffold 34 - *G. aculeatus* v. *E. lucius*

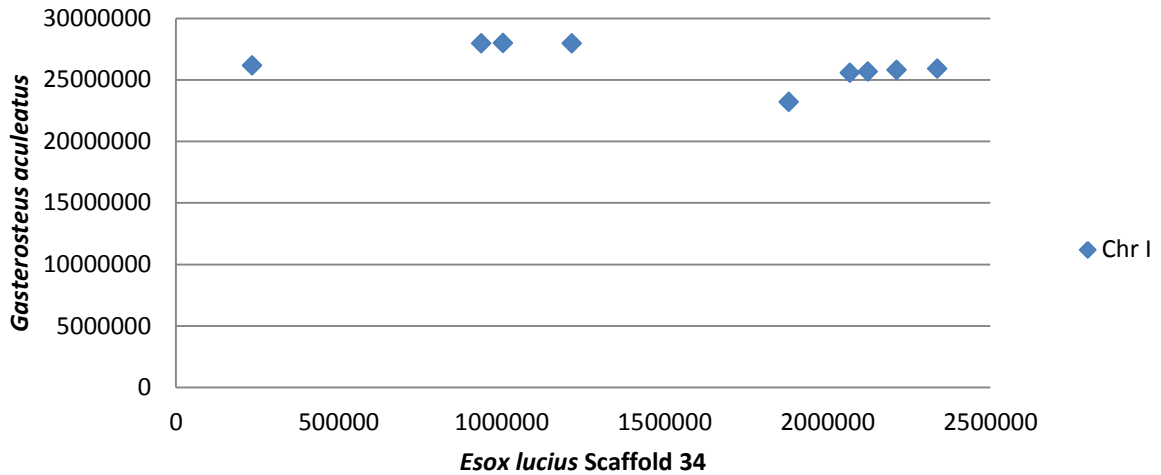

## Scaffold 34 - *O. latipes* v. *E. lucius*

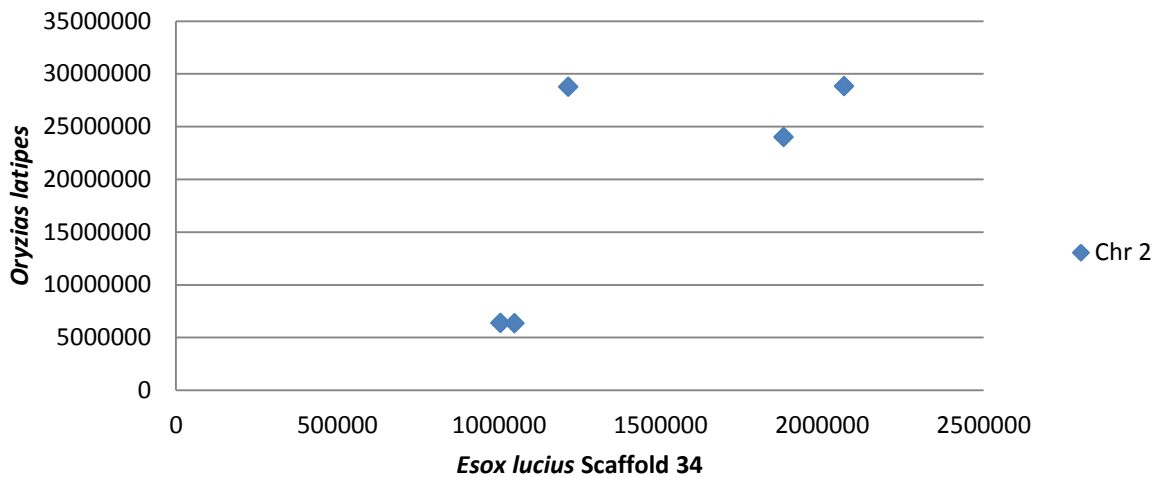

## Scaffold 34 - *D. rerio* v. *E. lucius*

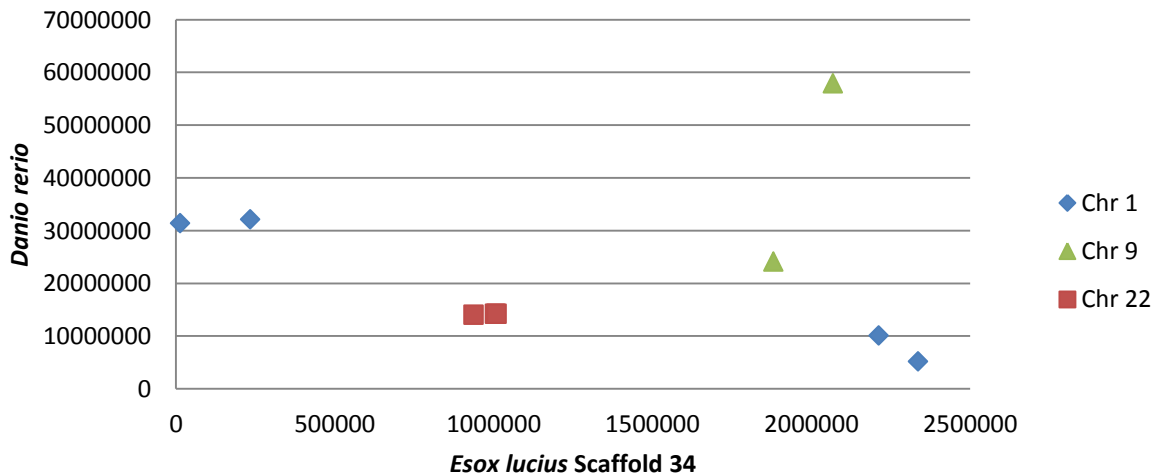

# Scaffold 35

## Scaffold 35 - *G. aculeatus* v. *E. lucius*

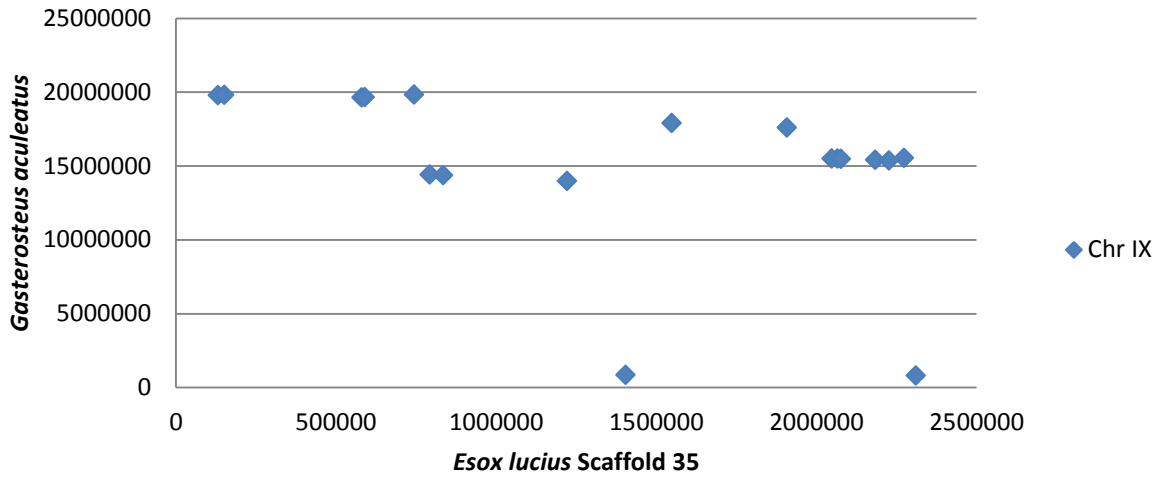

## Scaffold 35 - *O. latipes* v. *E. lucius*

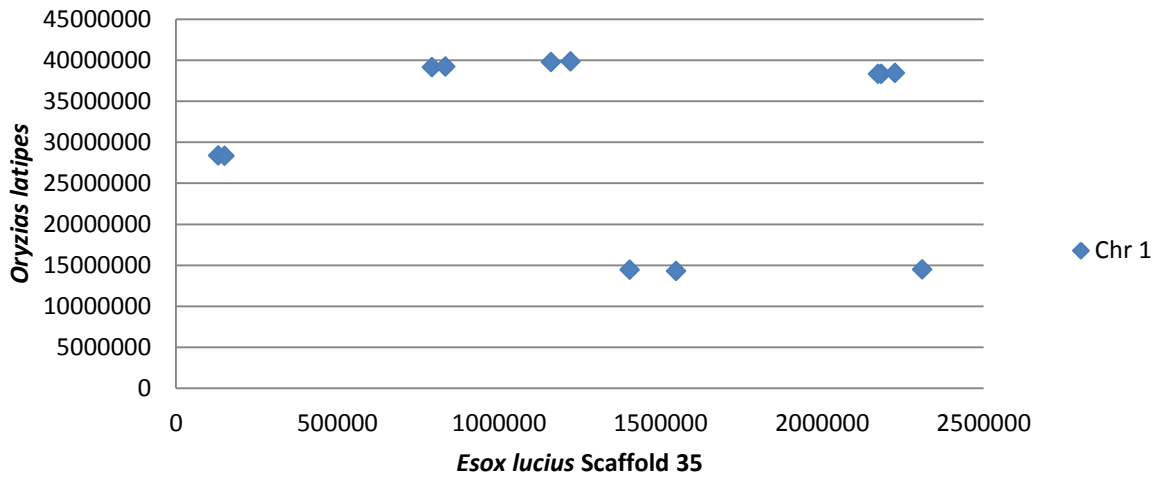

## Scaffold 35 - *D. rerio* v. *E. lucius*

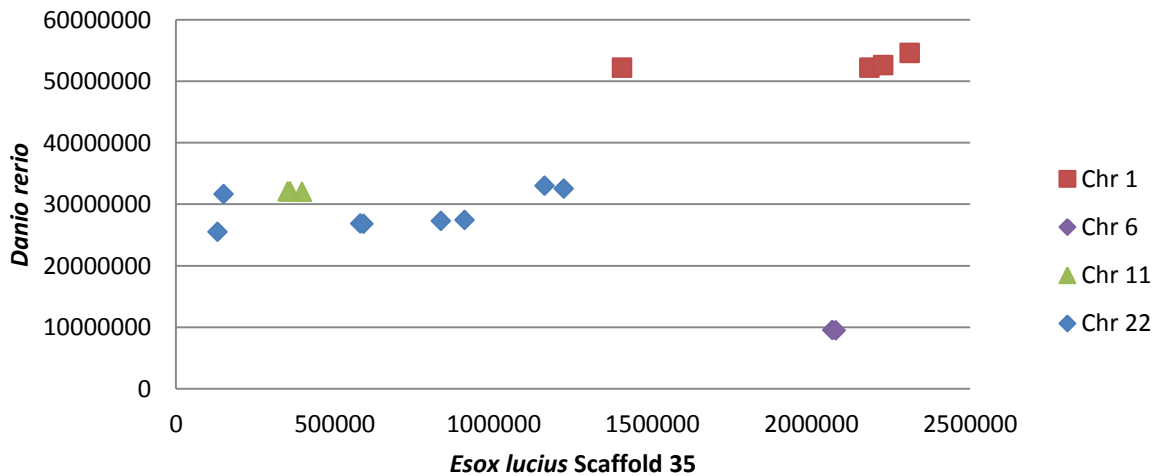

# Scaffold 36

## Scaffold 36 - *G. aculeatus* v. *E. lucius*

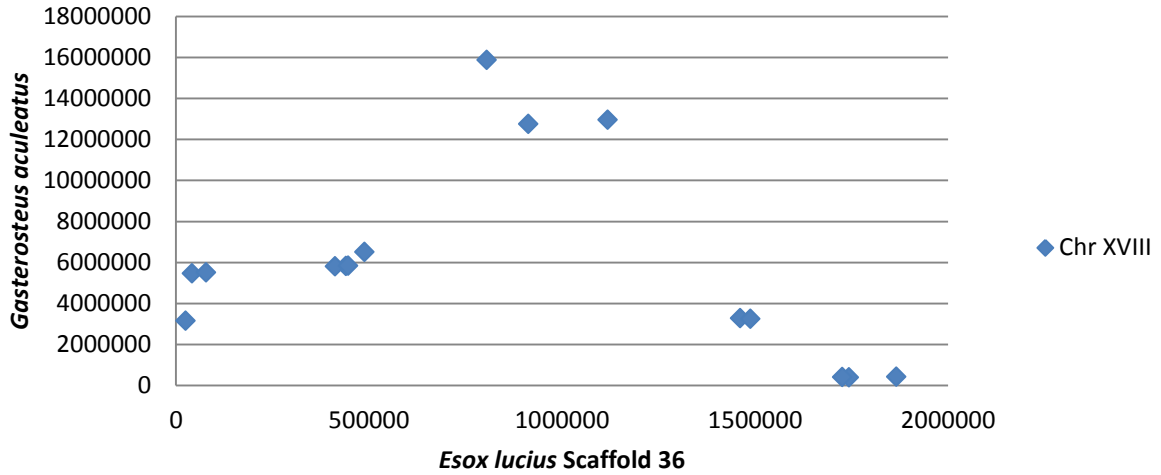

## Scaffold 36 - *O. latipes* v. *E. lucius*

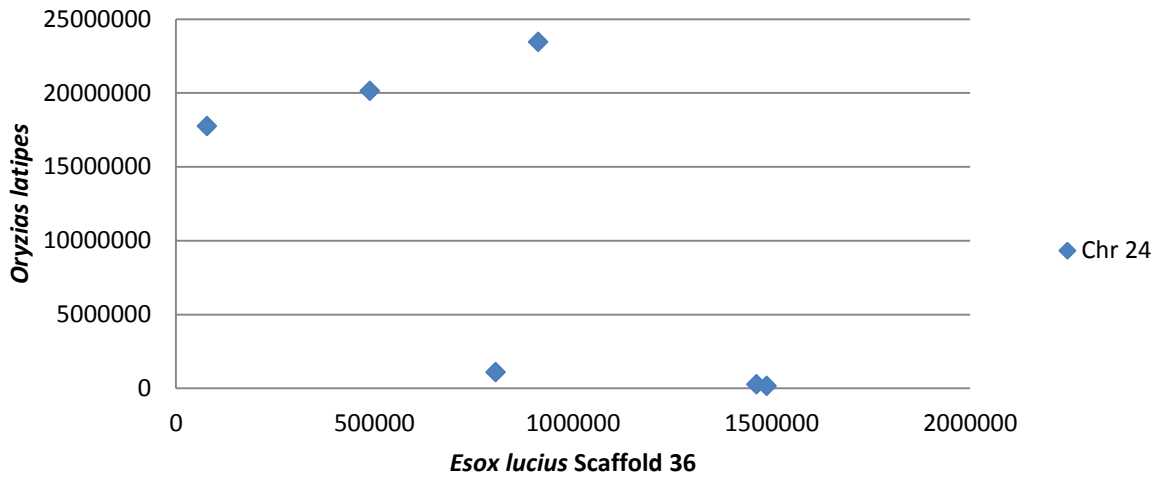

## Scaffold 36 - *D. rerio* v. *E. lucius*

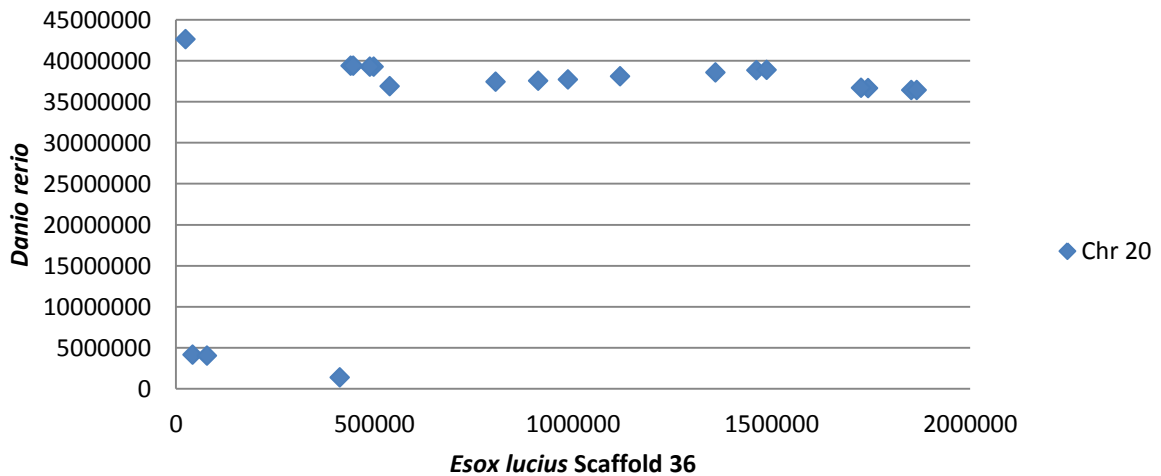

# Scaffold 37

## Scaffold 37 - *G. aculeatus* v. *E. lucius*

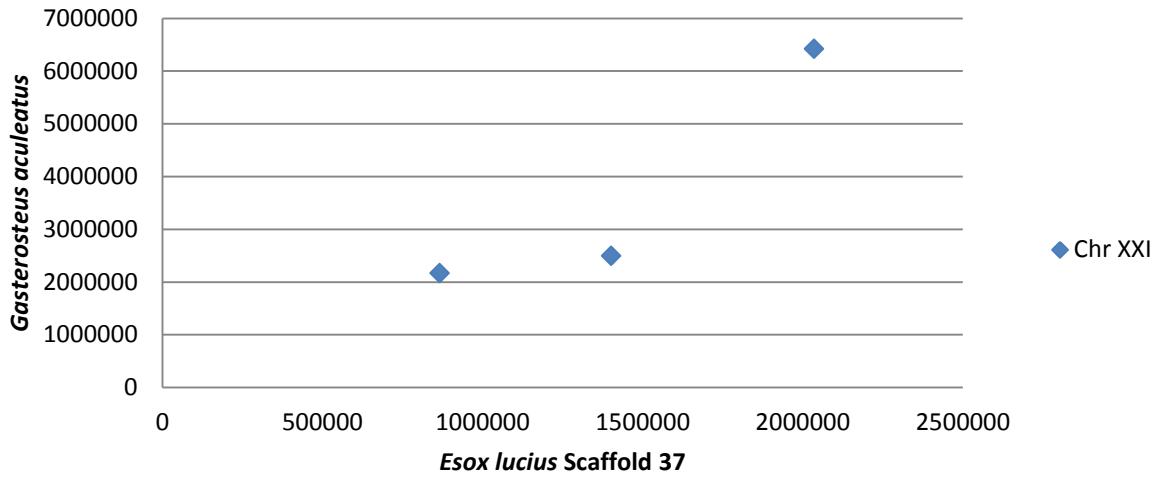

## Scaffold 37 - *O. latipes* v. *E. lucius*

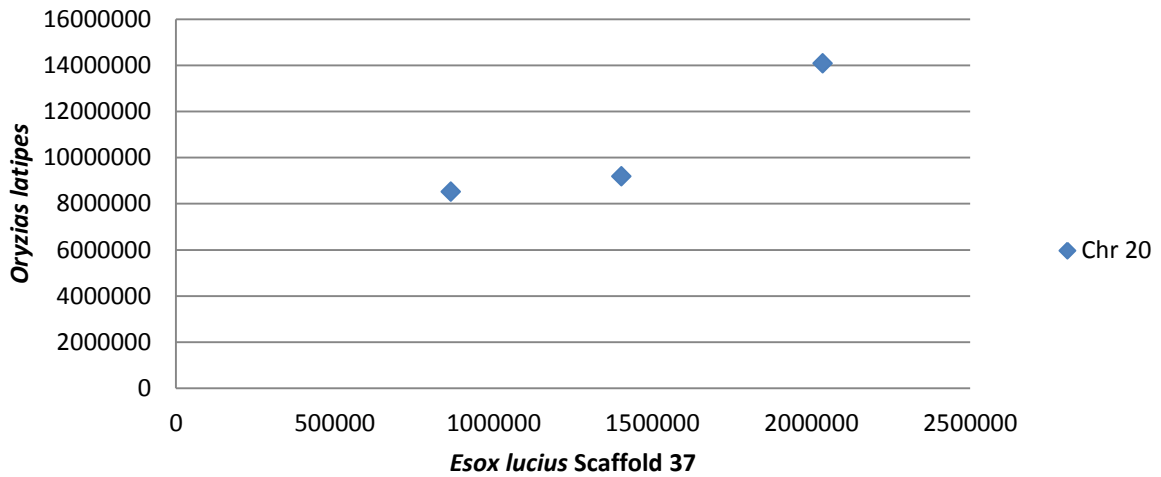

## Scaffold 37 - *D. rerio* v. *E. lucius*

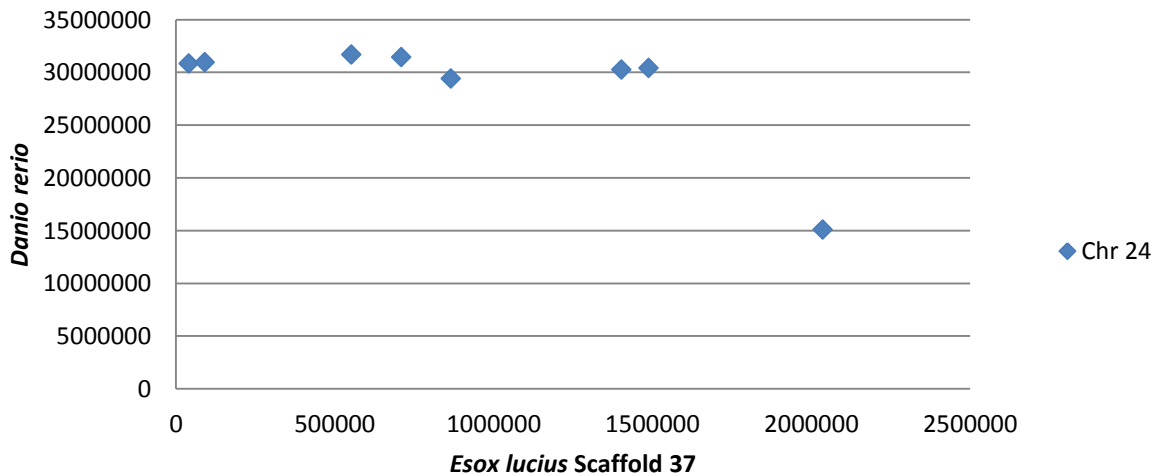

# Scaffold 38

## Scaffold 38 - *G. aculeatus* v. *E. lucius*

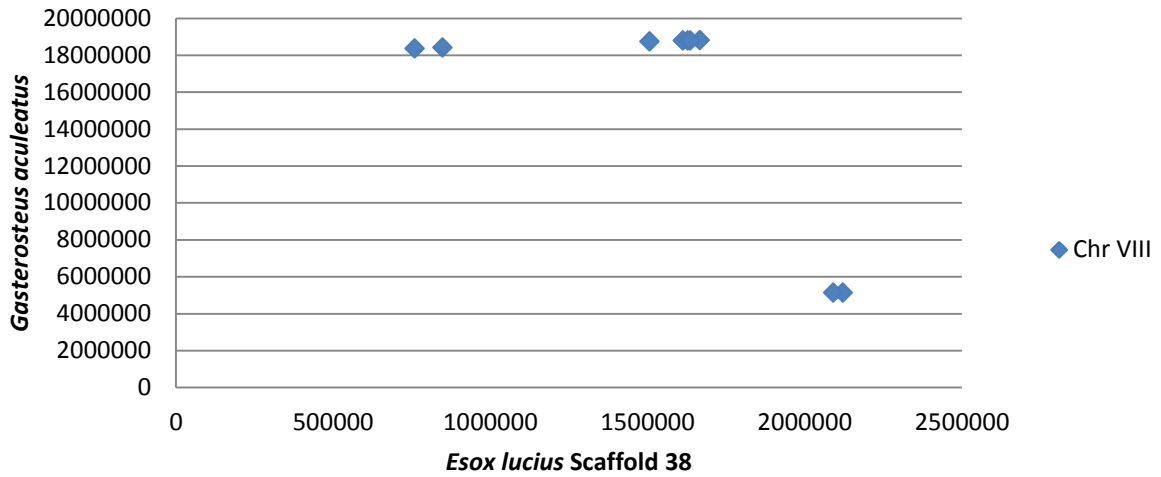

## Scaffold 38 - *O. latipes* v. *E. lucius*

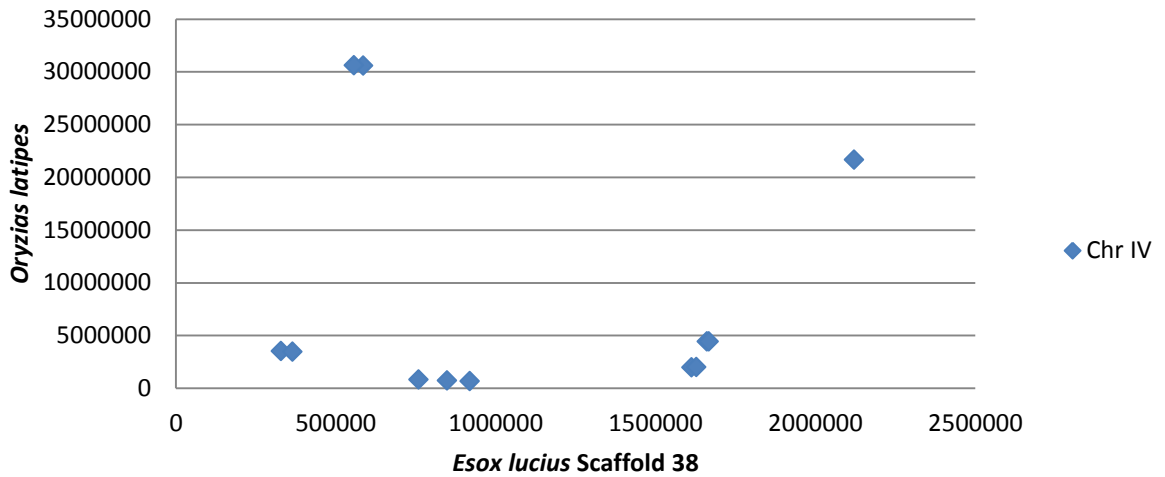

## Scaffold 38 - *D. rerio* v. *E. lucius*

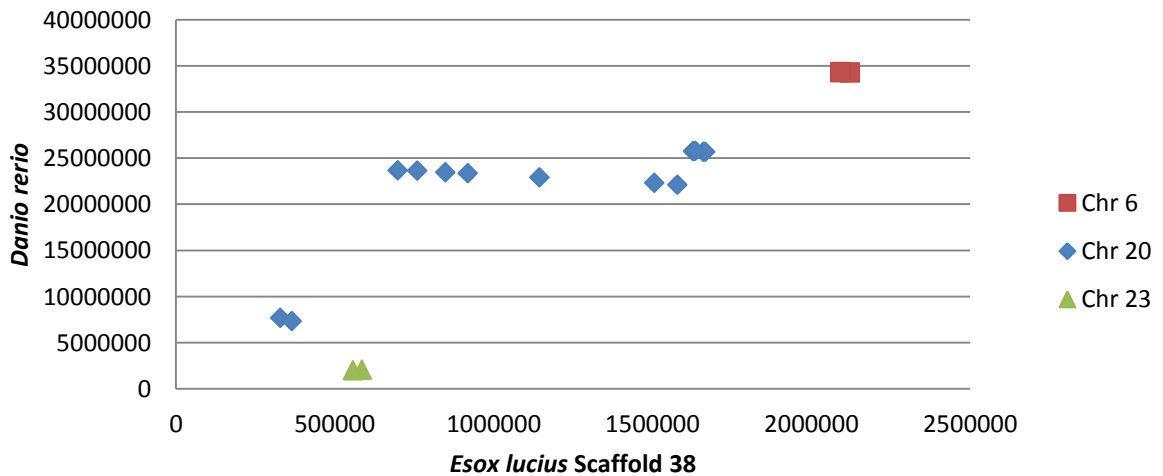

# Scaffold 39

## Scaffold 39 - *G. aculeatus* v. *E. lucius*

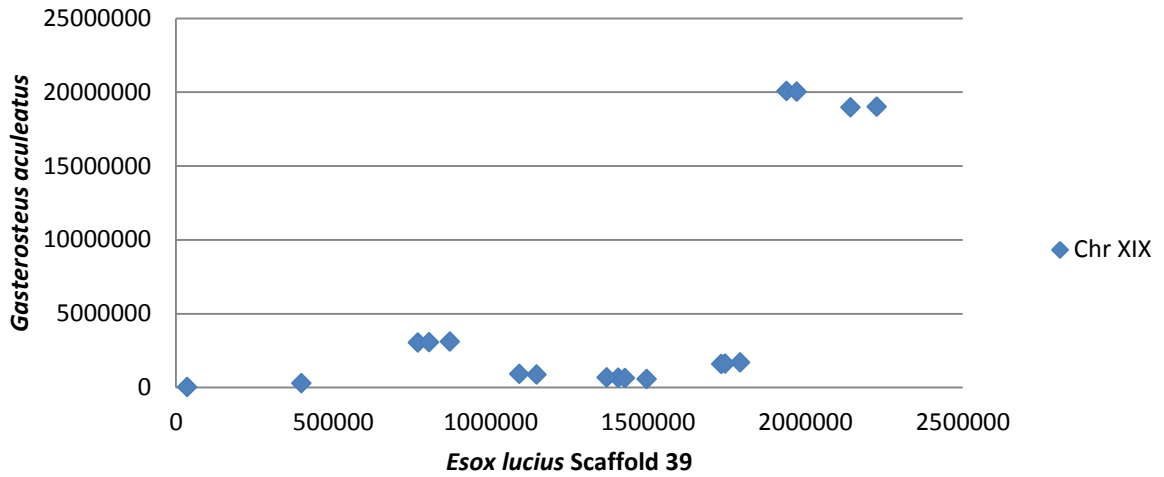

## Scaffold 39 - *O. latipes* v. *E. lucius*

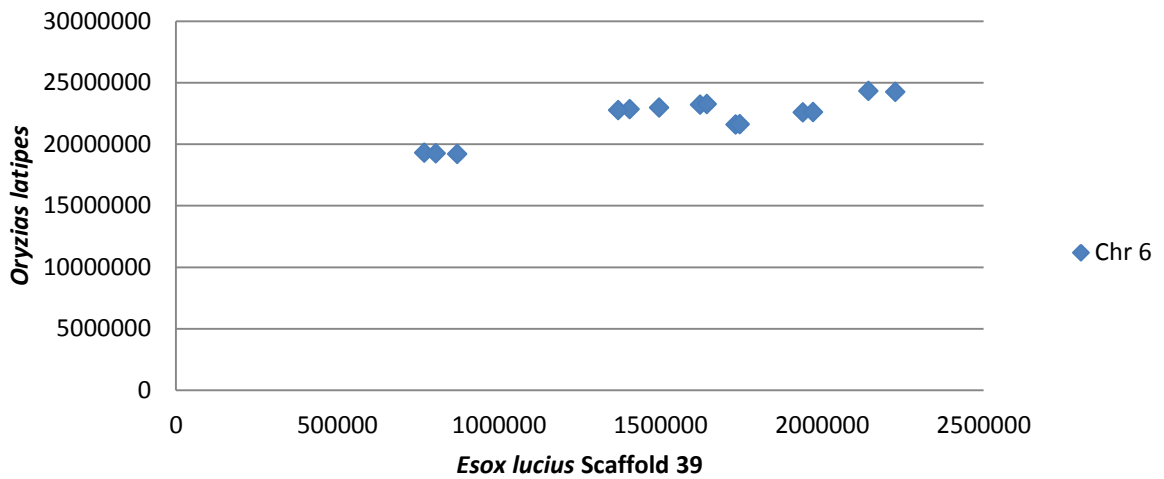

## Scaffold 39 - *D. rerio* v. *E. lucius*

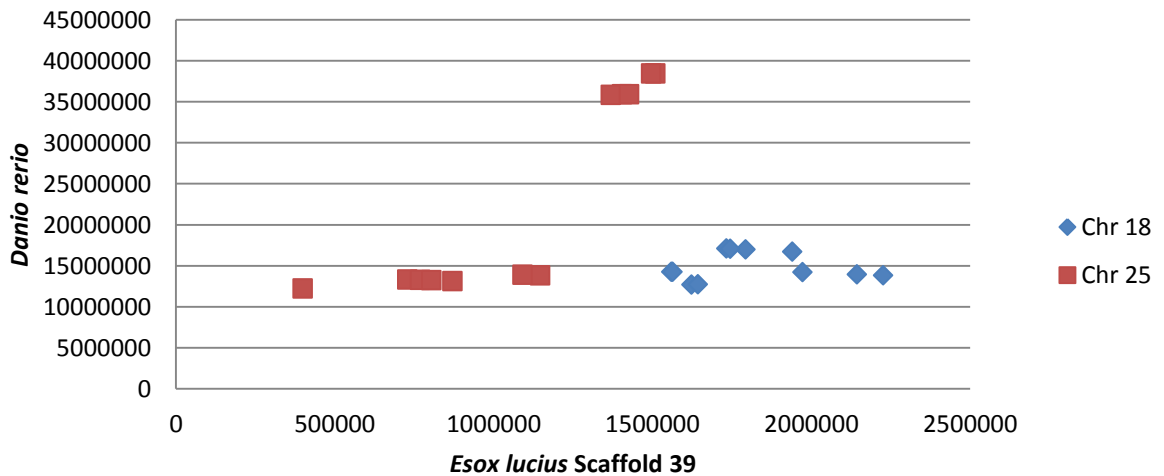



# Scaffold 40

## Scaffold 40 - *G. aculeatus* v. *E. lucius*

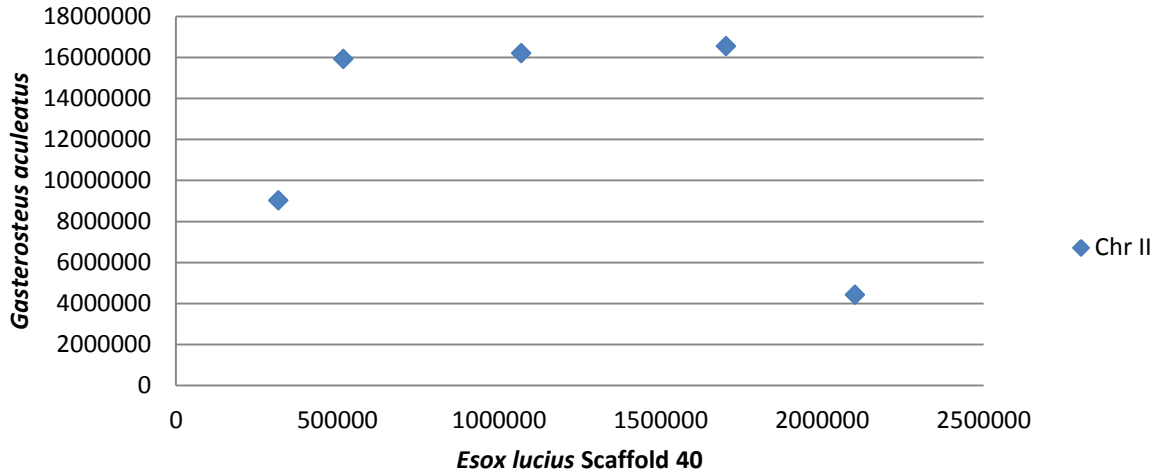

## Scaffold 40 - *O. latipes* v. *E. lucius*

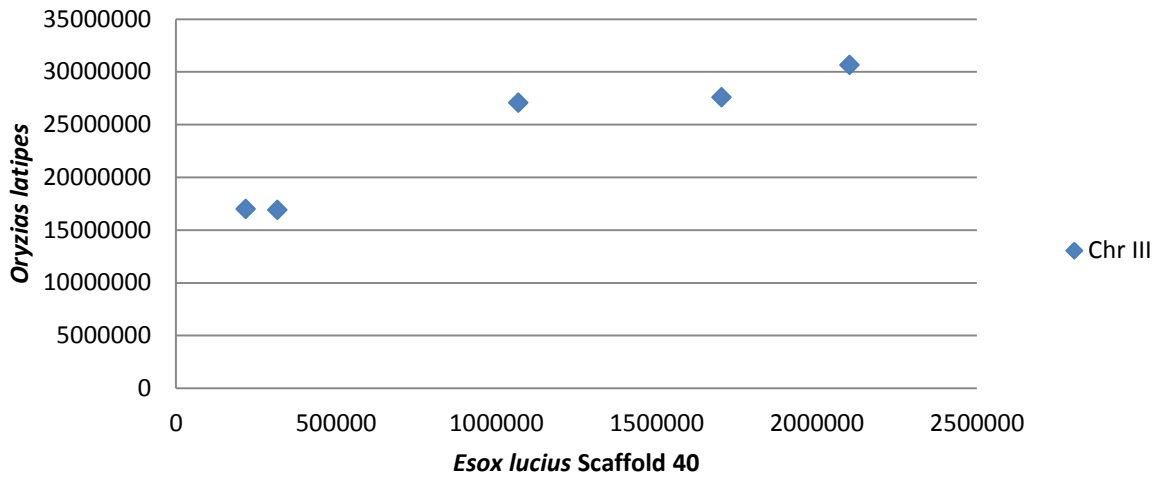

## Scaffold 40 - *D. rerio* v. *E. lucius*

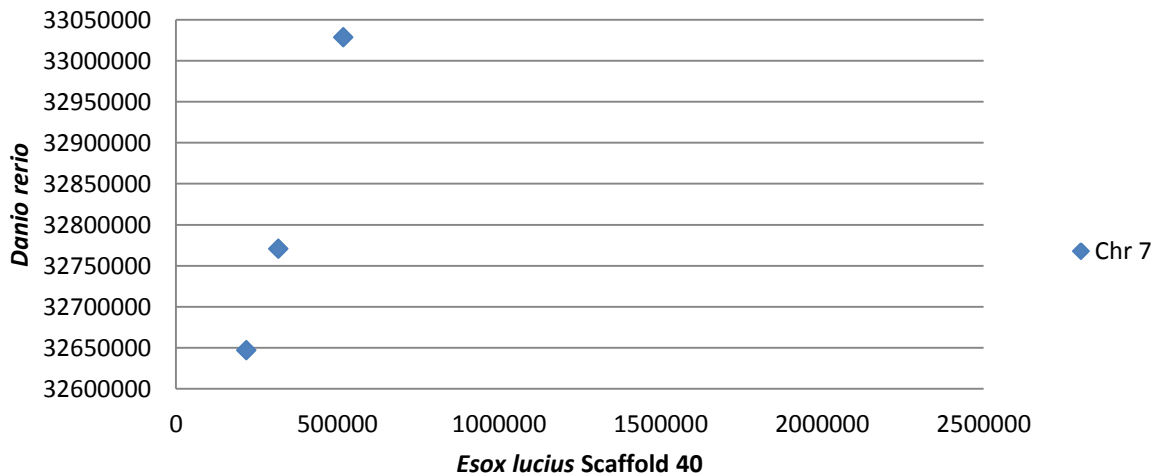

# Scaffold 41

## Scaffold 41 - *G. aculeatus* v. *E. lucius*

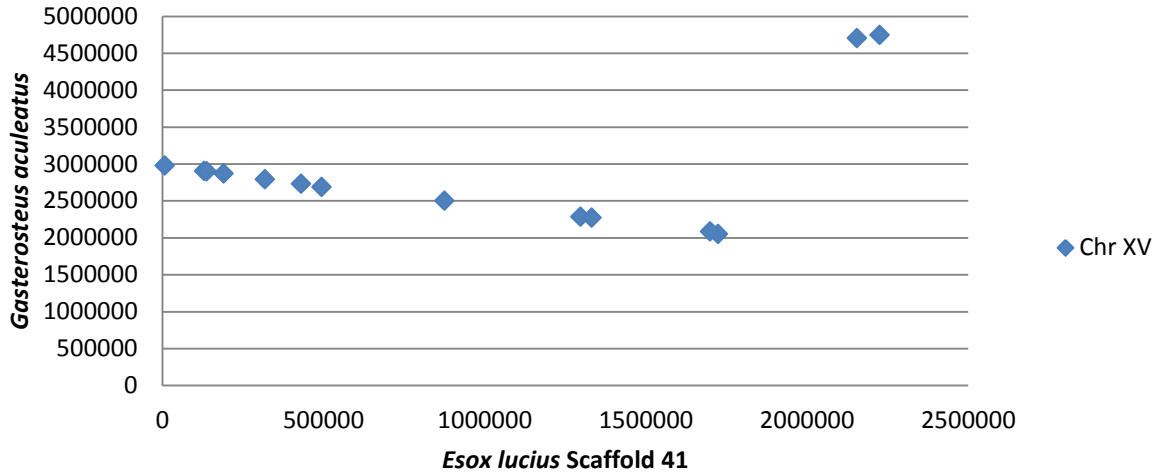

## Scaffold 41 - *O. latipes* v. *E. lucius*

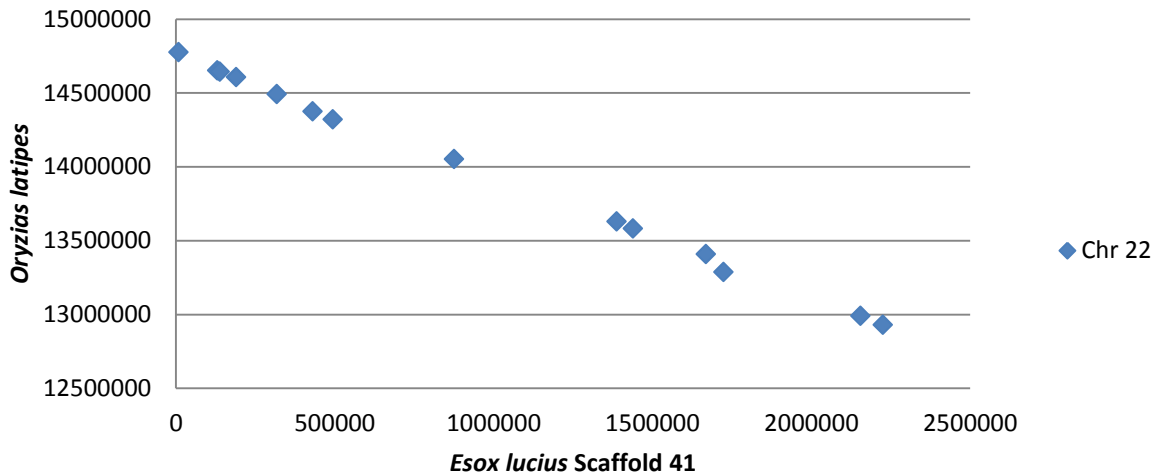

## Scaffold 41 - *D. rerio* v. *E. lucius*

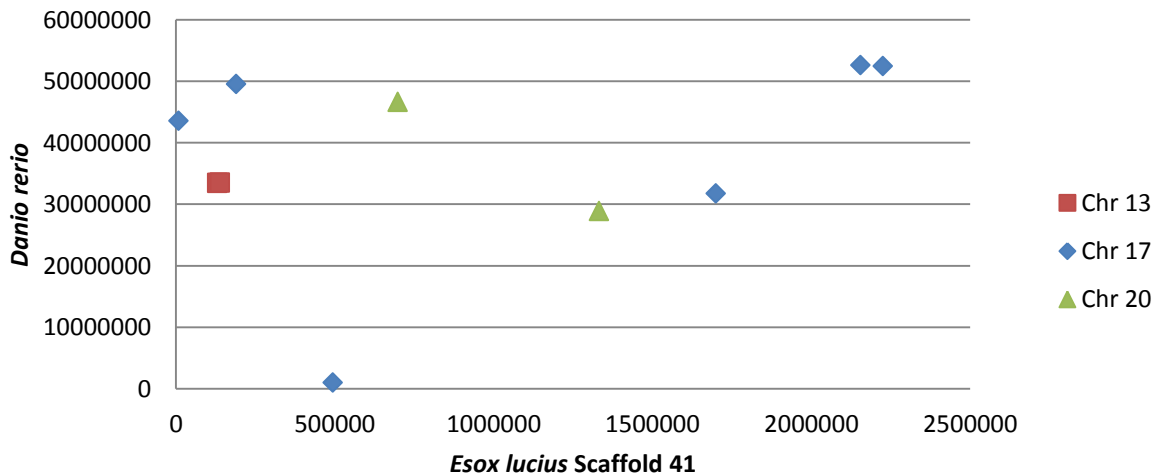

# Scaffold 42

## Scaffold 42 - *G. aculeatus* v. *E. lucius*

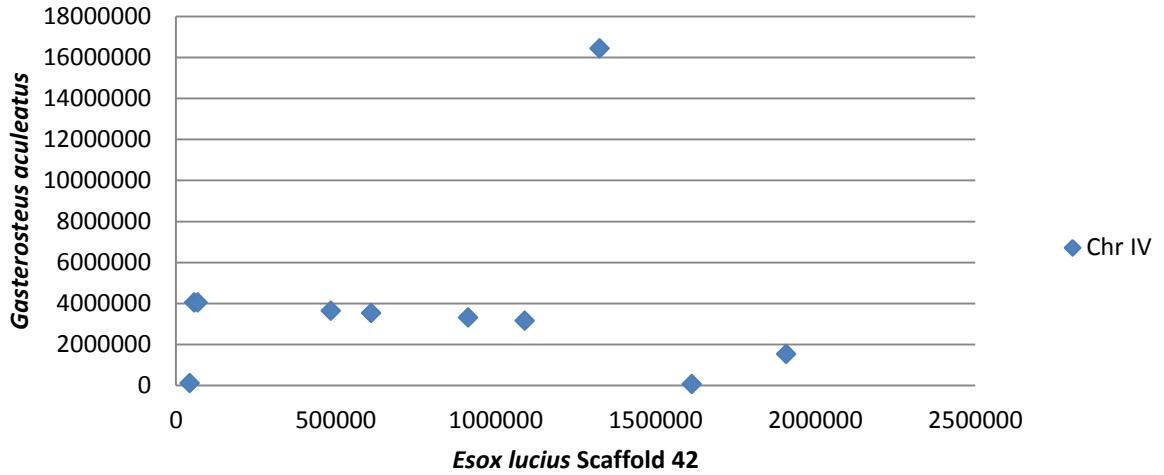

## Scaffold 42 - *O. latipes* v. *E. lucius*

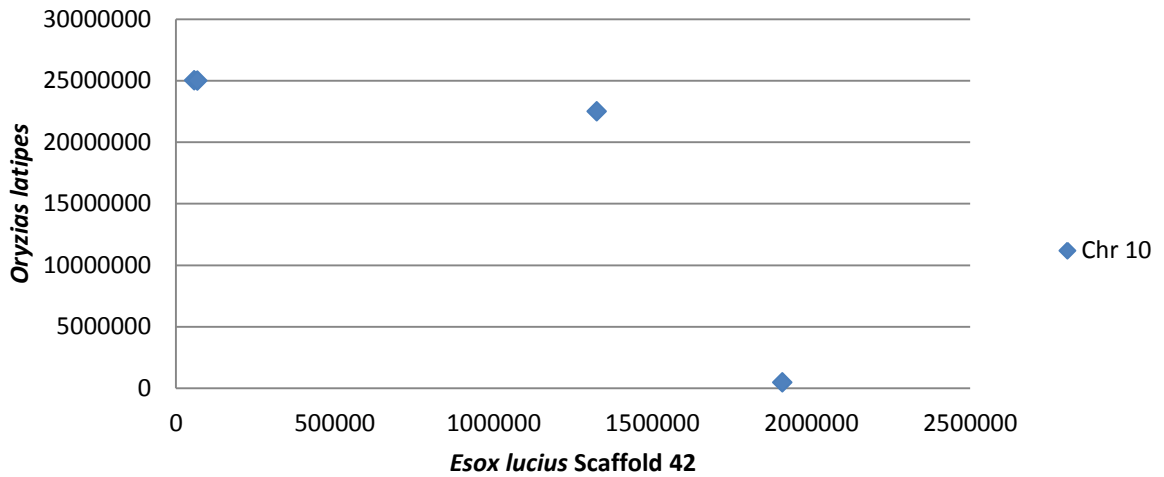

## Scaffold 42 - *D. rerio* v. *E. lucius*

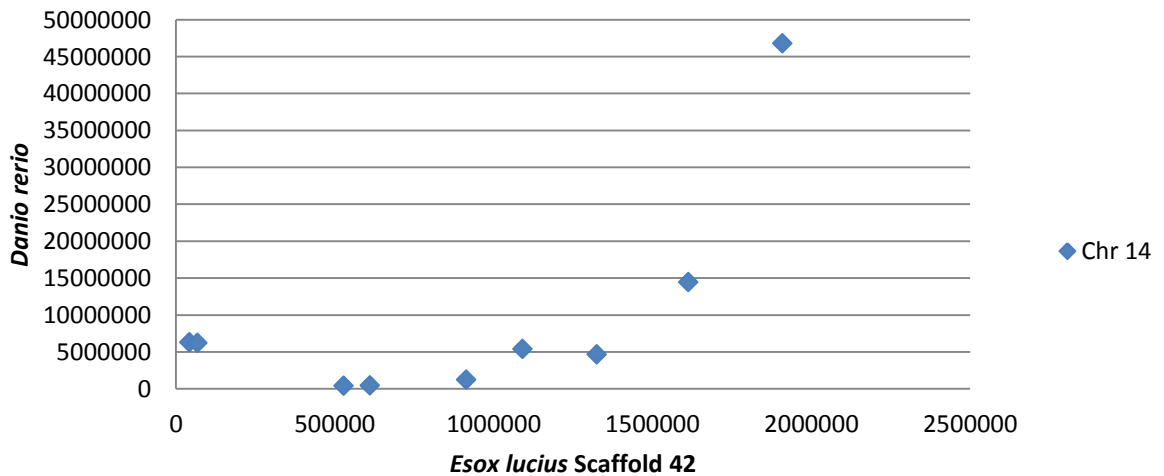

# Scaffold 43

## Scaffold 43 - *G. aculeatus* v. *E. lucius*

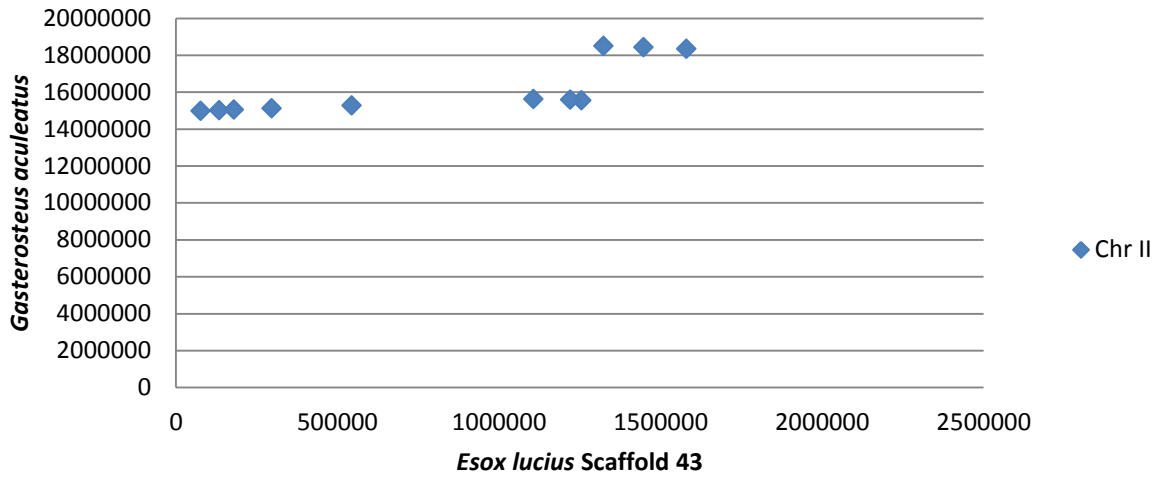

## Scaffold 43 - *O. latipes* v. *E. lucius*

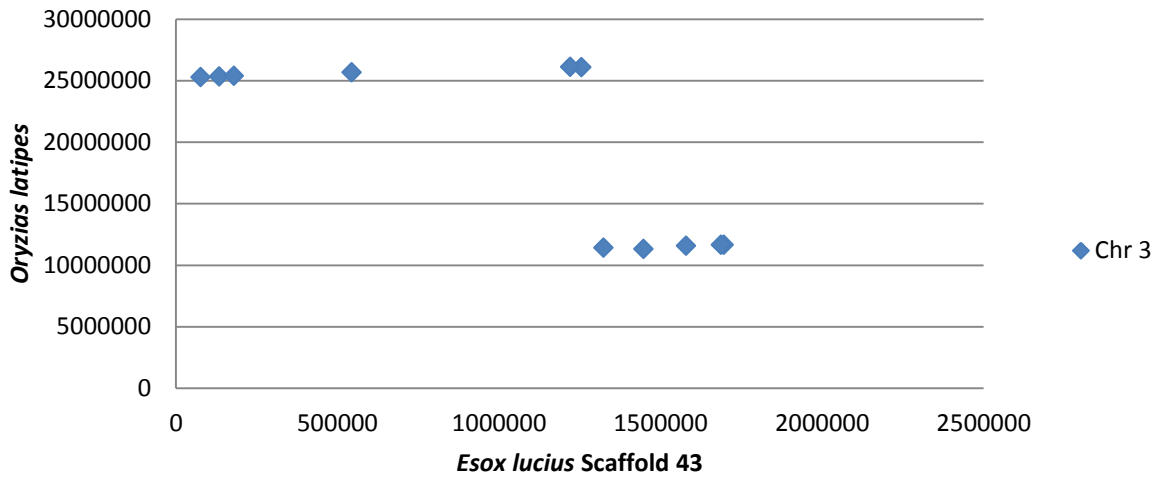

## Scaffold 43 - *D. rerio* v. *E. lucius*

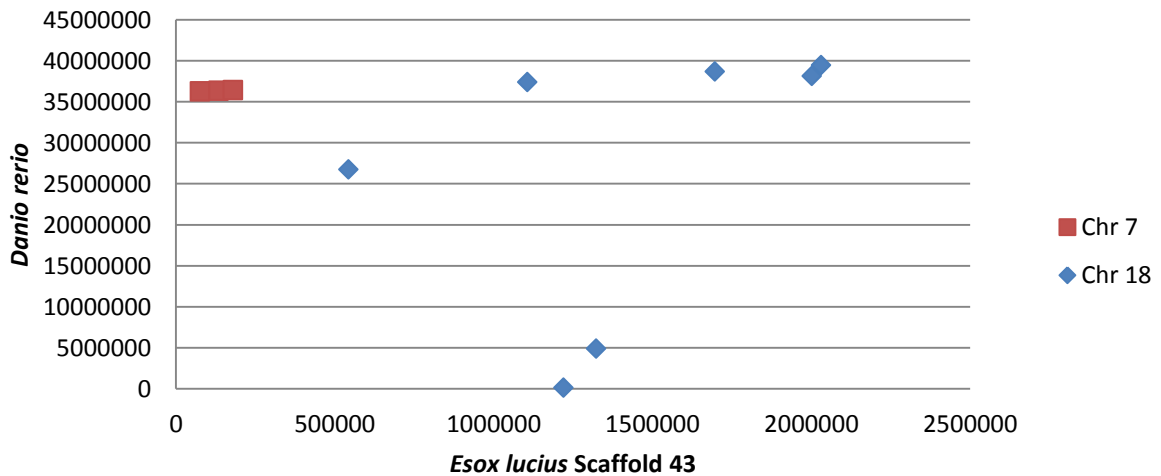

# Scaffold 44

## Scaffold 44 - *G. aculeatus* v. *E. lucius*

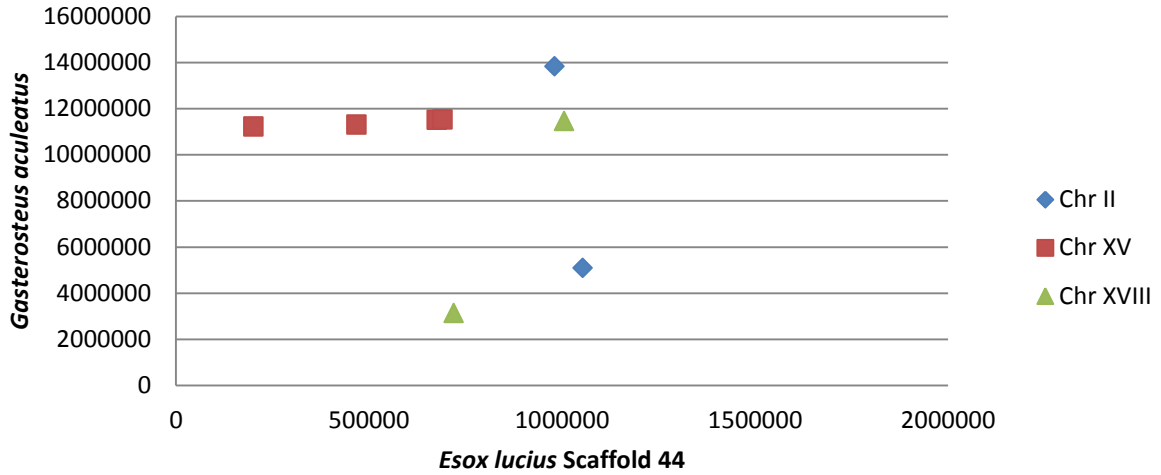

## Scaffold 44 - *O. latipes* v. *E. lucius*

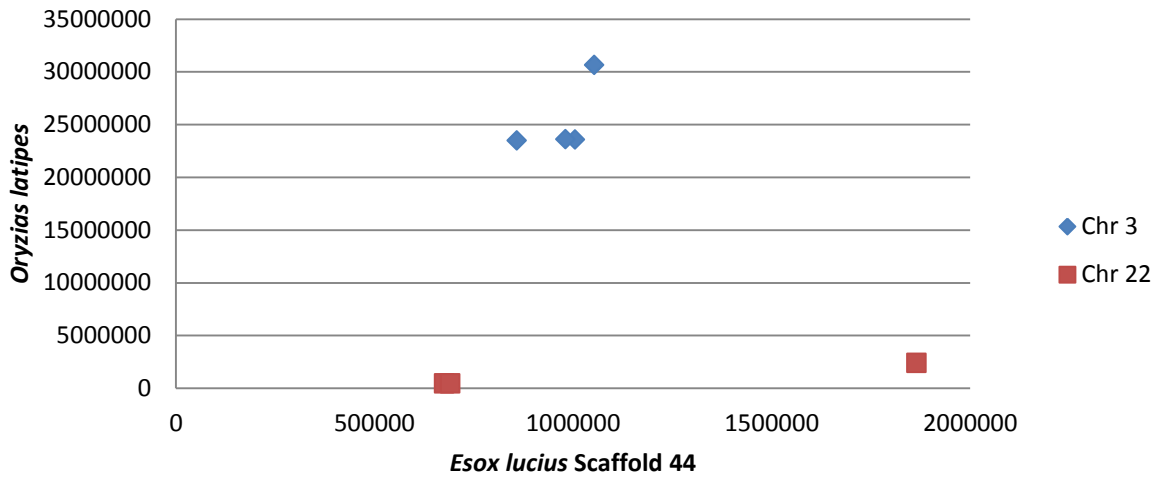

## Scaffold 44 - *D. rerio* v. *E. lucius*

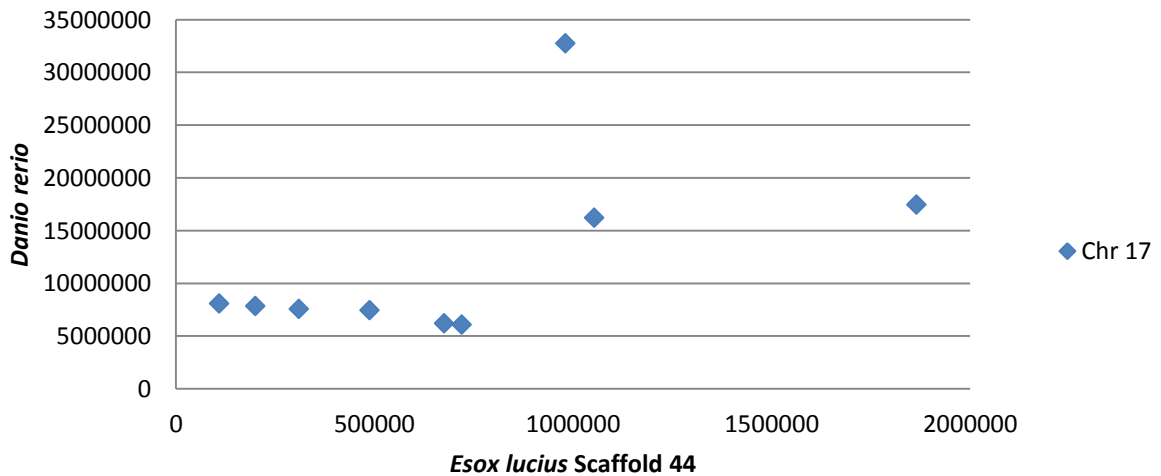

# Scaffold 45

## Scaffold 45 - *G. aculeatus* v. *E. lucius*

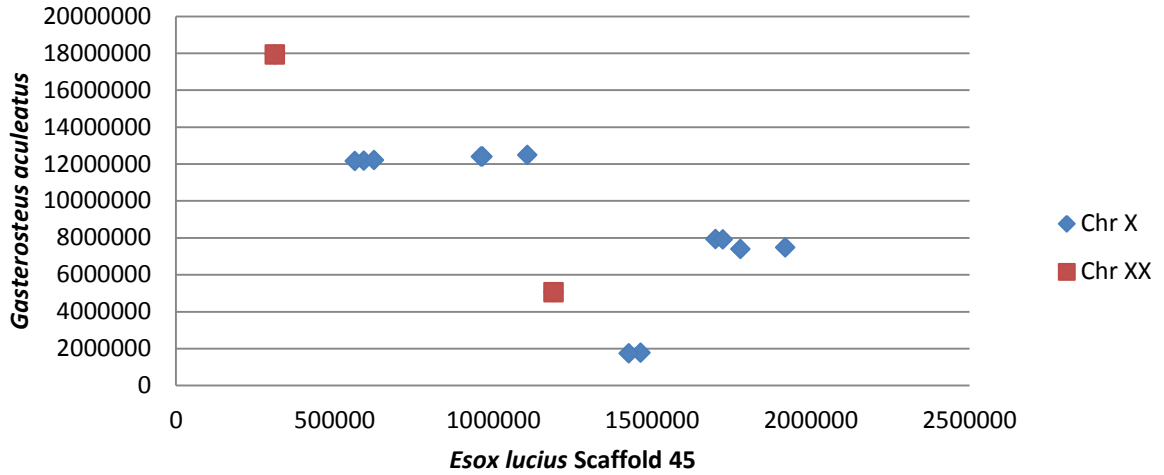

## Scaffold 45 - *O. latipes* v. *E. lucius*

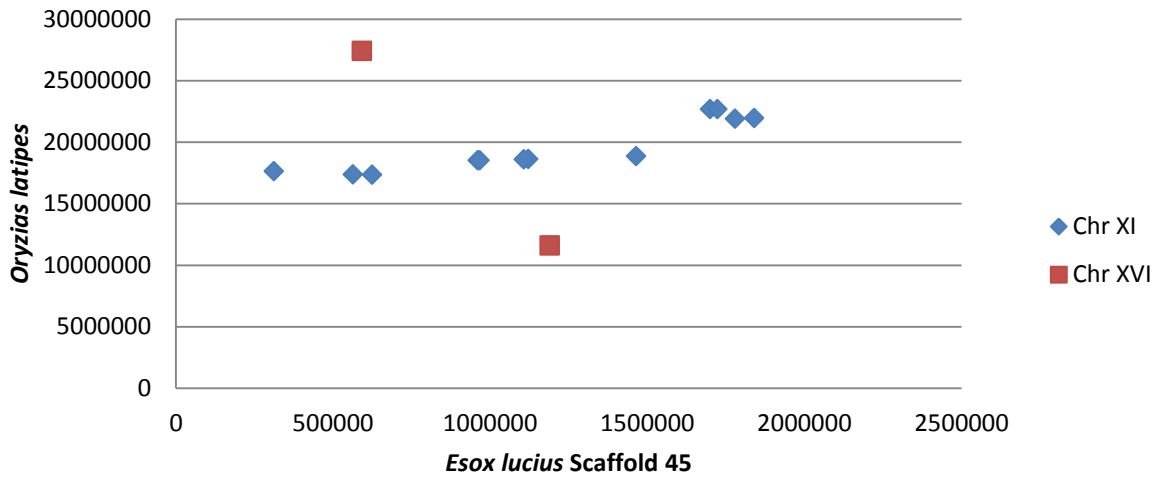

## Scaffold 45 - *D. rerio* v. *E. lucius*

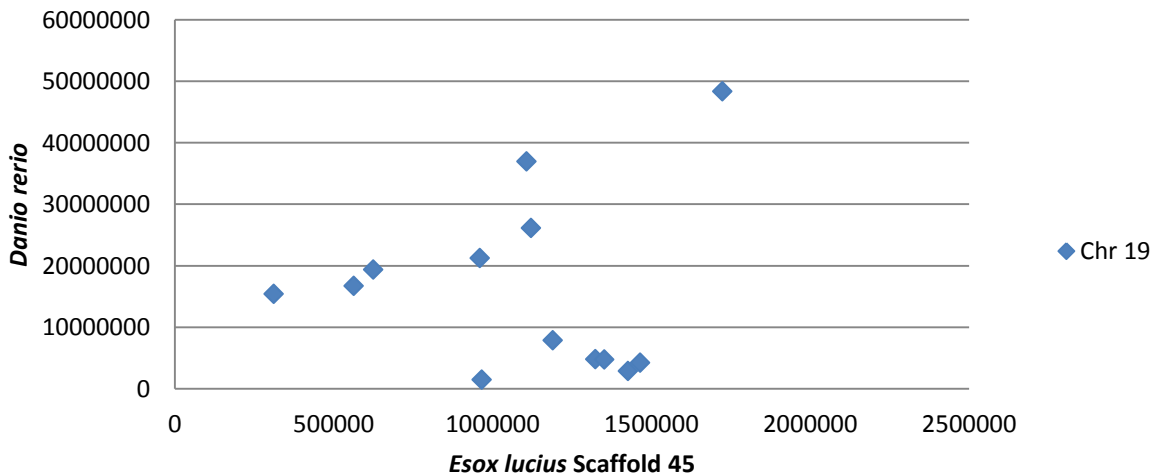

# Scaffold 46

## Scaffold 46 - *G. aculeatus* v. *E. lucius*

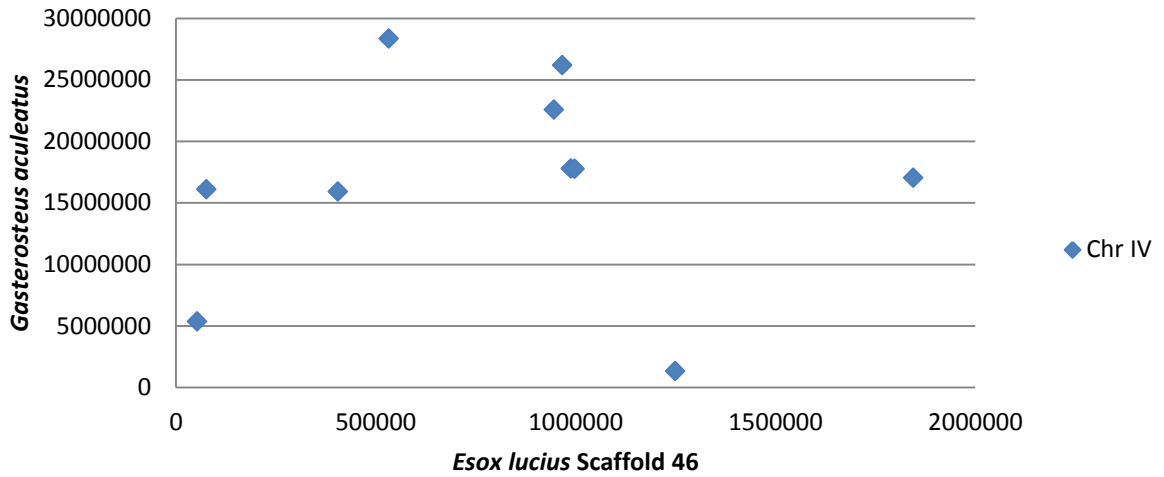

## Scaffold 46 - *O. latipes* v. *E. lucius*

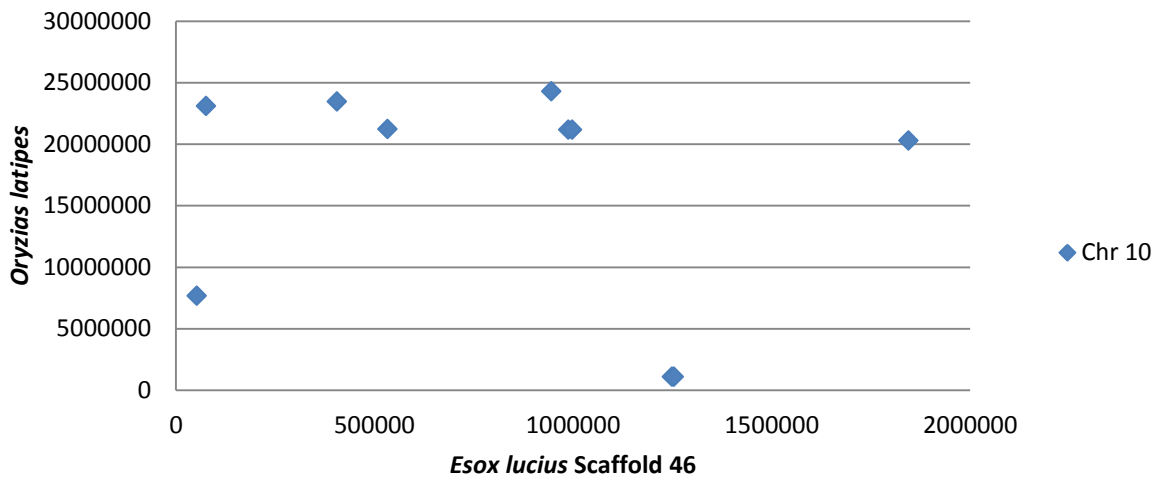

## Scaffold 46 - *D. rerio* v. *E. lucius*

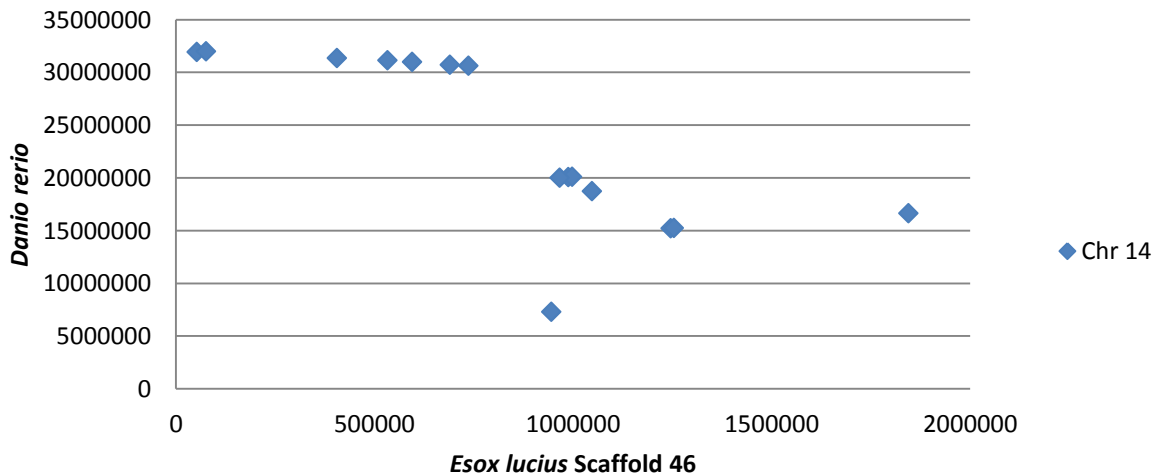

# Scaffold 47

## Scaffold 47 - *G. aculeatus* v. *E. lucius*

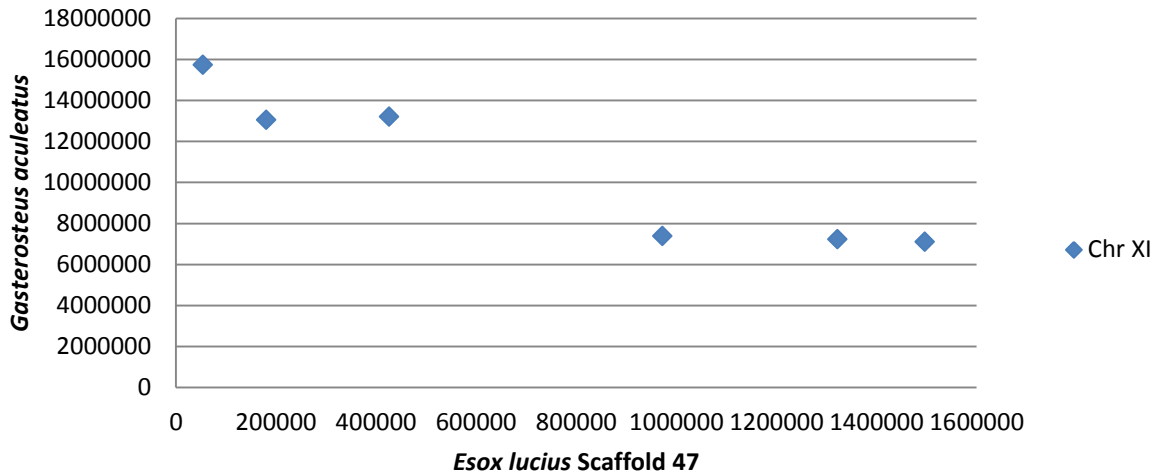

## Scaffold 47 - *O. latipes* v. *E. lucius*

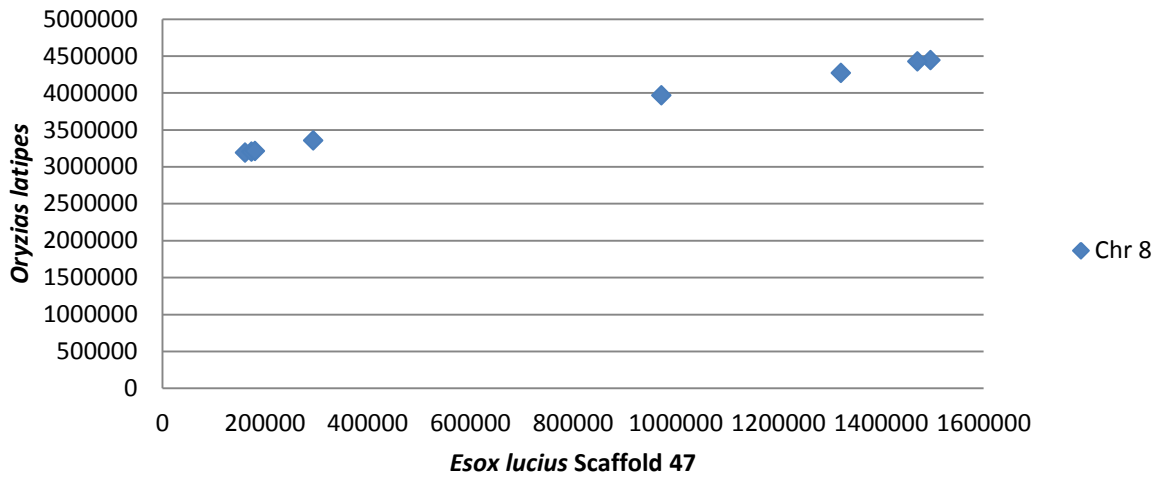

## Scaffold 47 - *D. rerio* v. *E. lucius*

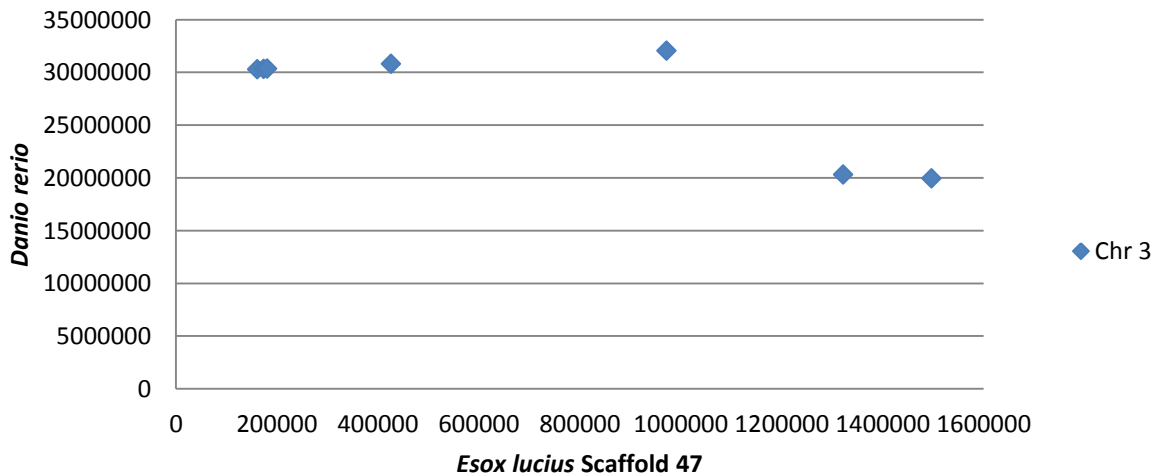



# Scaffold 48

## Scaffold 48 - *G. aculeatus* v. *E. lucius*

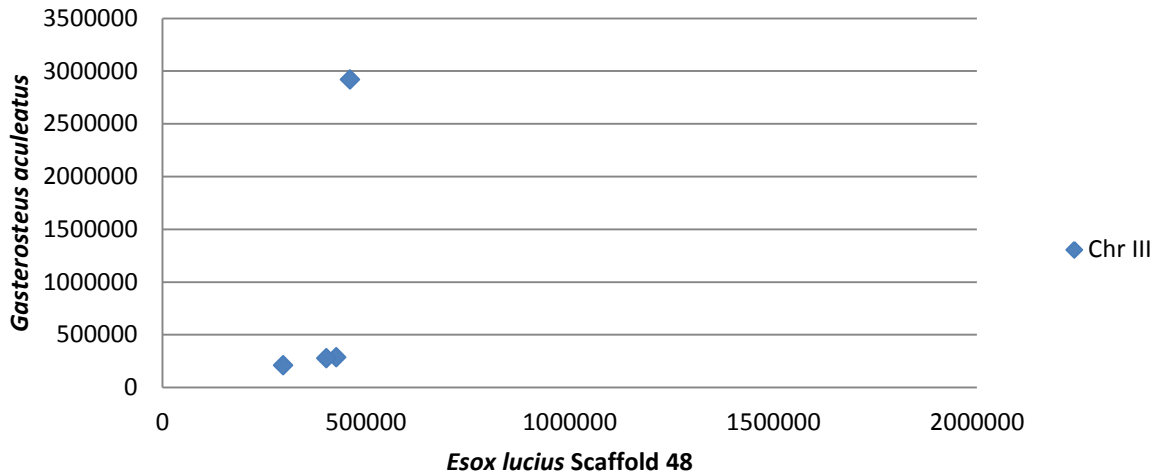

## Scaffold 48 - *O. latipes* v. *E. lucius*

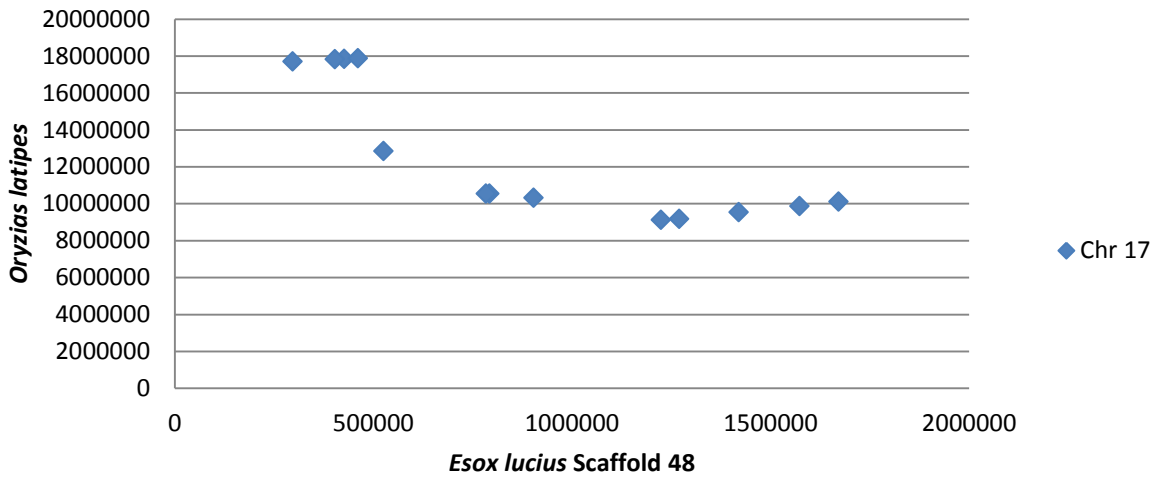

## Scaffold 48 - *D. rerio* v. *E. lucius*

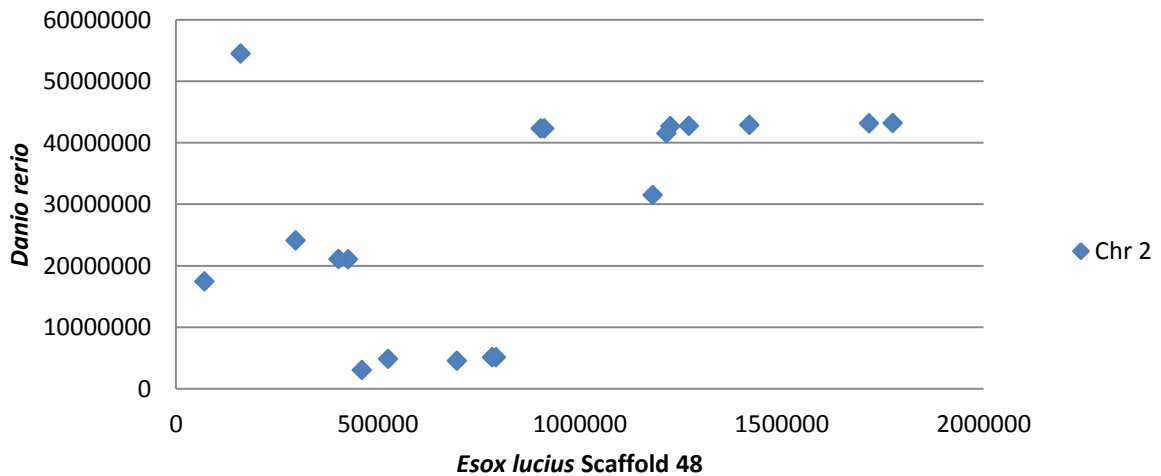

# Scaffold 49

## Scaffold 49 - *G. aculeatus* v. *E. lucius*

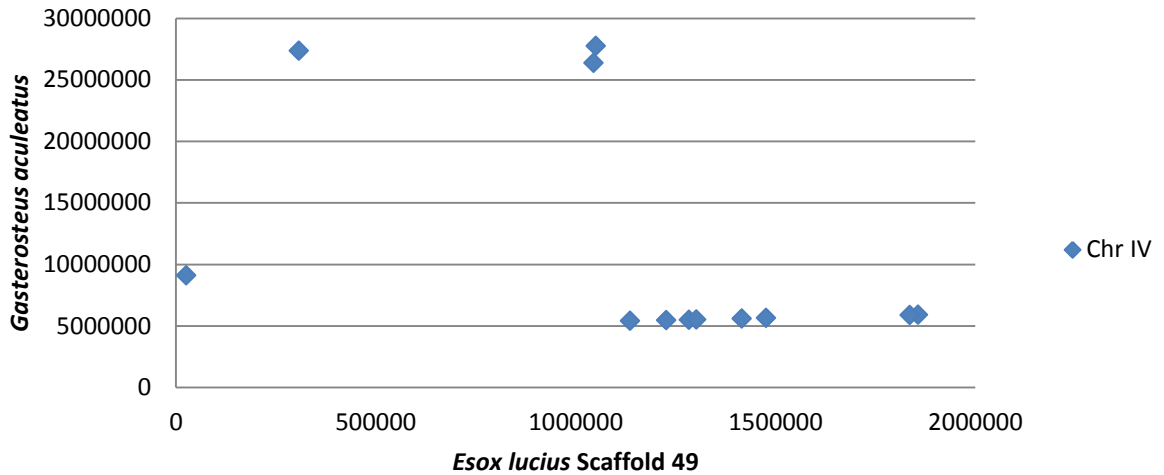

## Scaffold 49 - *O. latipes* v. *E. lucius*

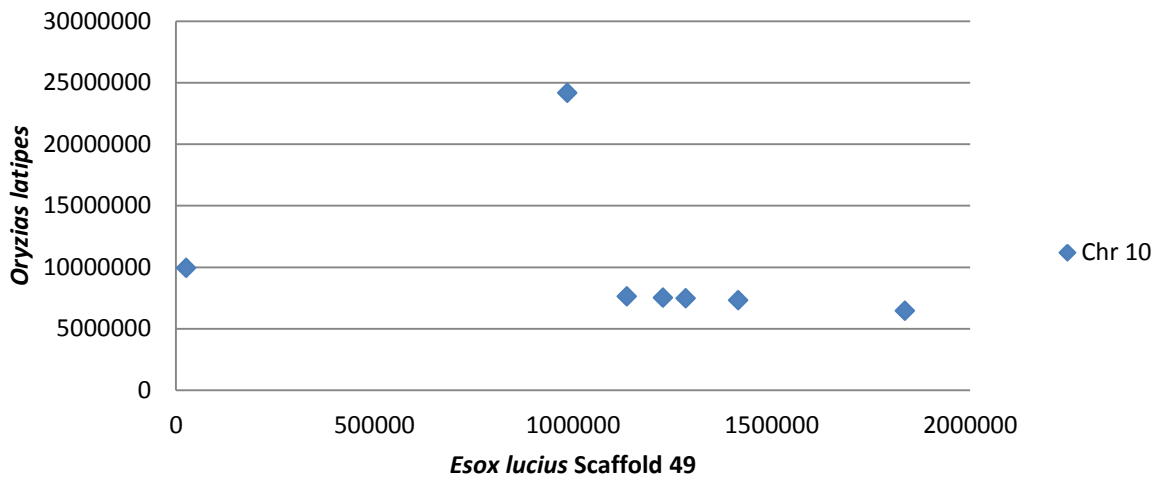

## Scaffold 49 - *D. rerio* v. *E. lucius*

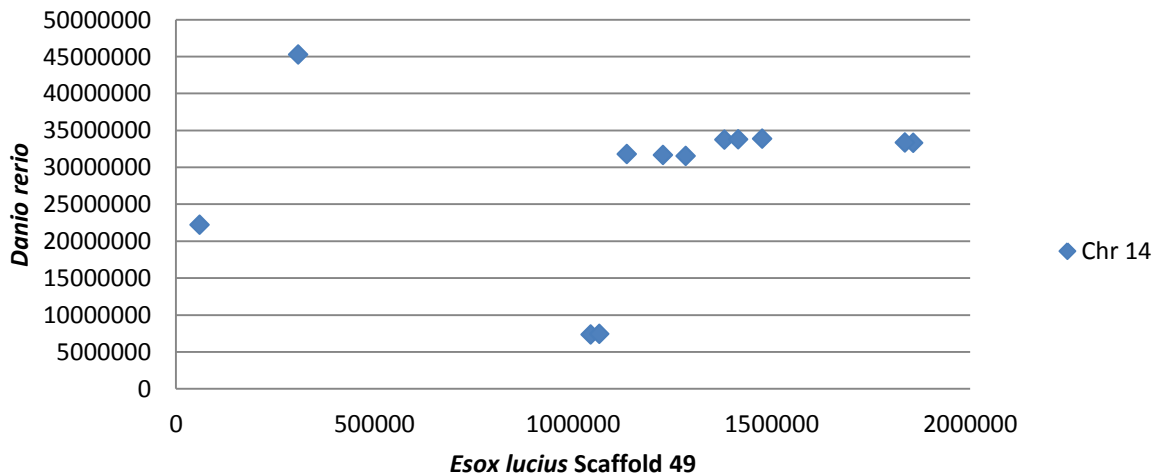

# Scaffold 50

## Scaffold 50 - *G. aculeatus* v. *E. lucius*

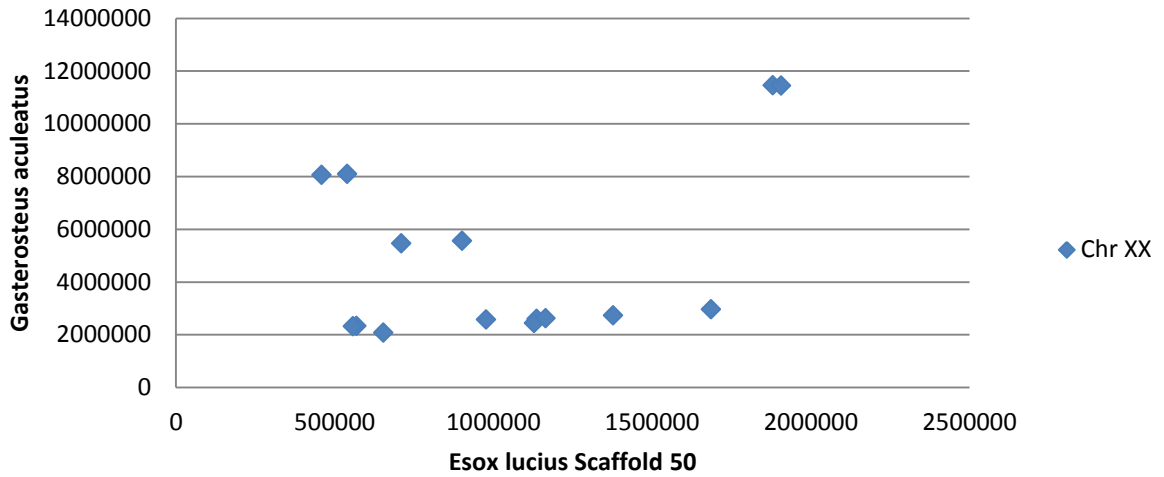

## Scaffold 50 - *O. latipes* v. *E. lucius*

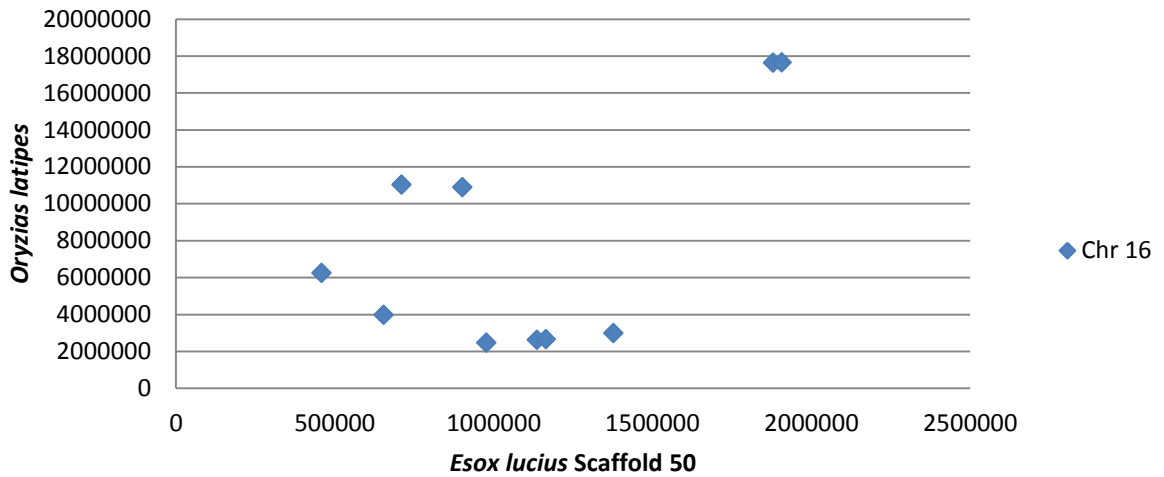

## Scaffold 50 - *D. rerio* v. *E. lucius*

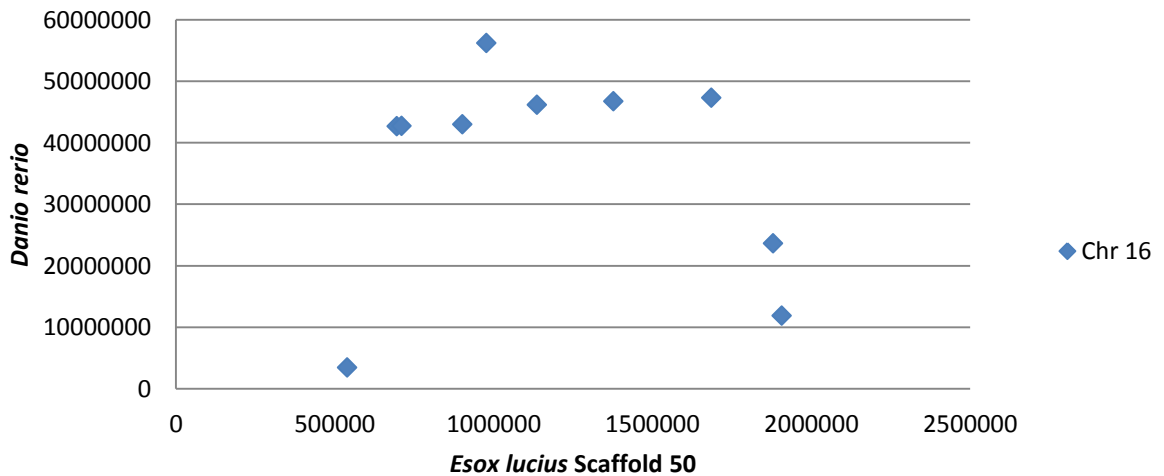

Supplement: pone.0102089.s002.pdf [file pone.0102089.s002.pdf]
