# Supplementary material for: The Genome and Linkage Map of the Northern Pike (Esox lucius): Conserved Synteny Revealed between the Salmonid Sister Group and the Neoteleostei
Source: PubMed Central journal article supplement (PMC4113312; doi:10.1371/journal.pone.0102089), 2014-07-28
Supplement: pone.0102089.s001.pdf [file pone.0102089.s001.pdf]

**LG01-MALE-1**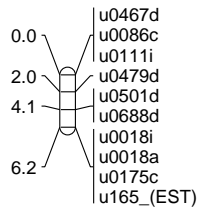**LG01-MALE-2**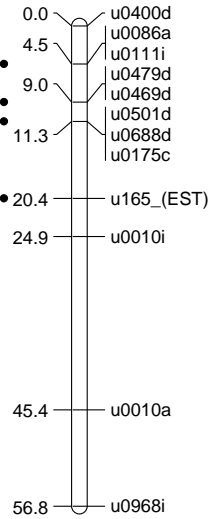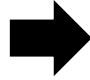**LG01-MALE-MERGE**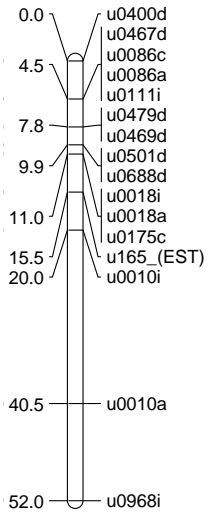**LG01-MERGE**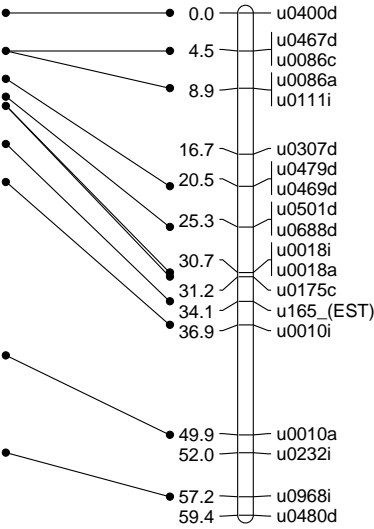**LG01-FEMALE**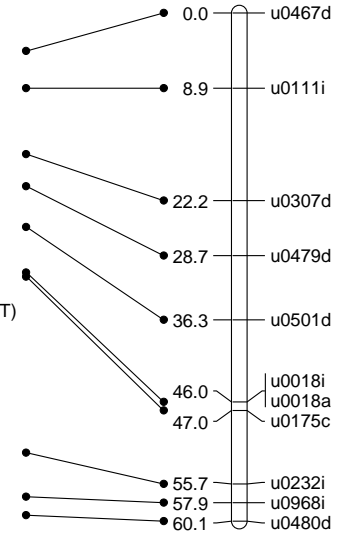**LG02-MALE-1**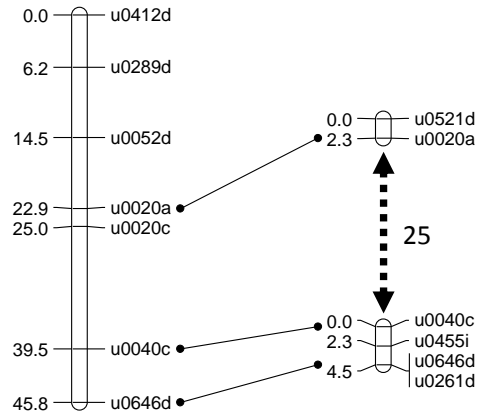**LG02-MALE-2****LG02-MALE-MERGE**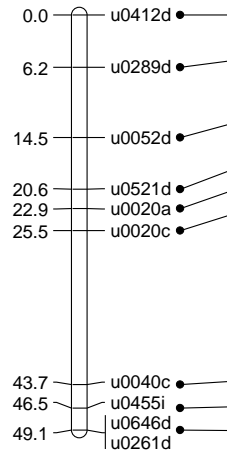**LG02-MERGE**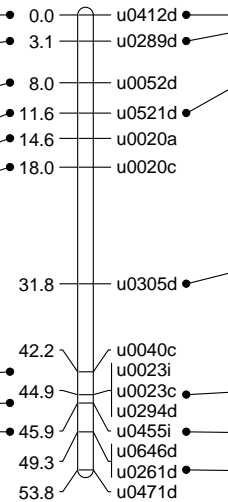**LG02-FEMALE**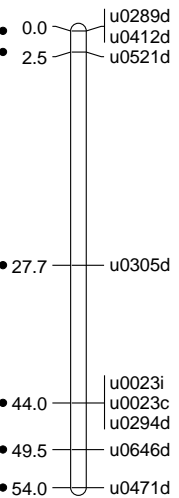

**LG03-MALE-1**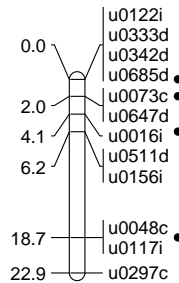**LG03-MALE-2**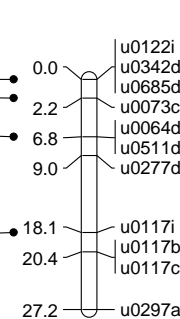**LG03-MALE-MERGE**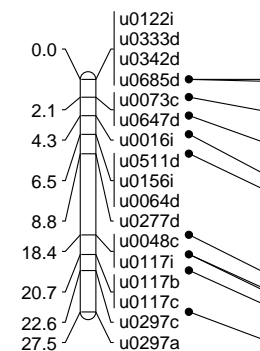**LG03-MERGE**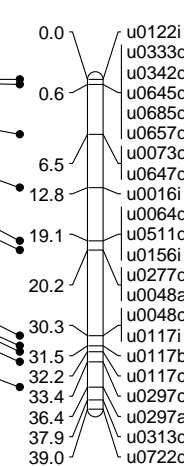**LG03-FEMALE**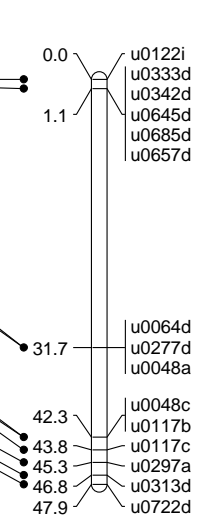**LG04-MALE-1**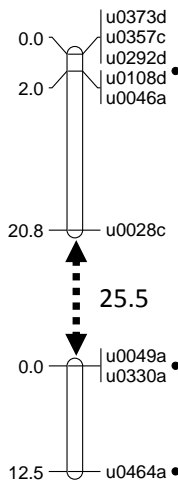**LG04-MALE-2**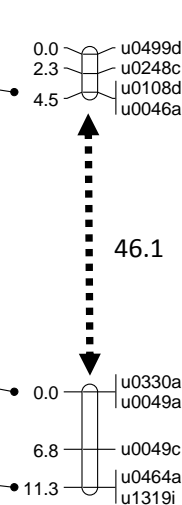**LG04-MALE-MERGE**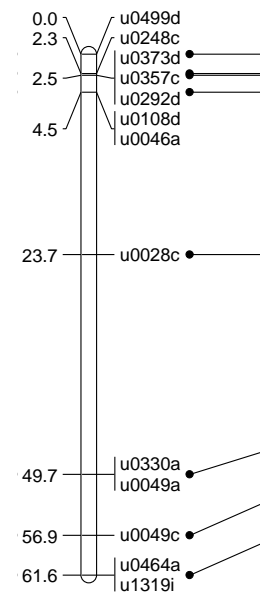**LG04-MERGE**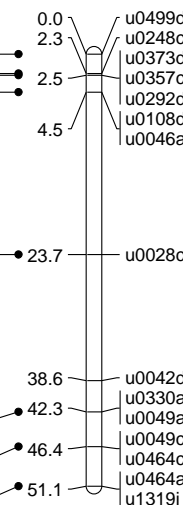**LG04-FEMALE**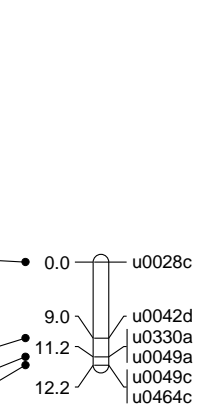

**LG05-MALE-1**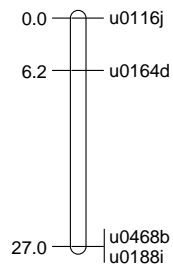**LG05-MALE-2**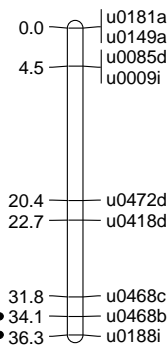**LG05-MALE-MERGE**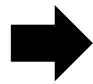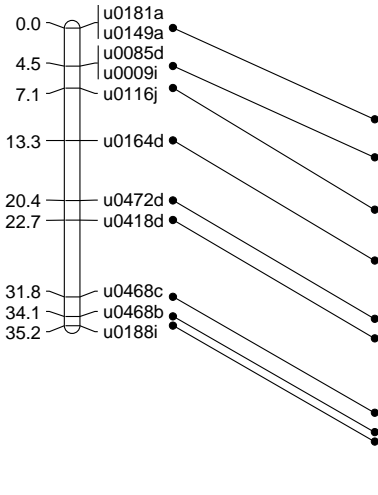**LG05-MERGE**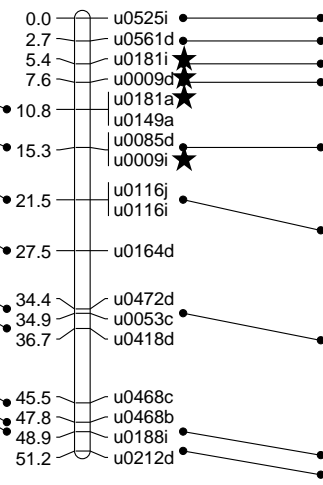**LG05-FEMALE**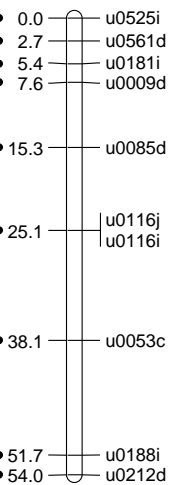**LG06-MALE-1**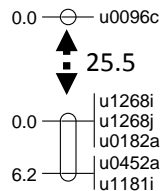**LG06-MALE-2**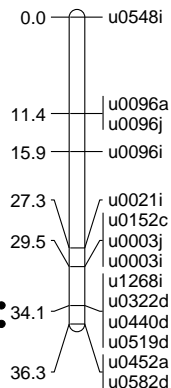**LG06-MALE-MERGE**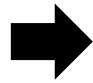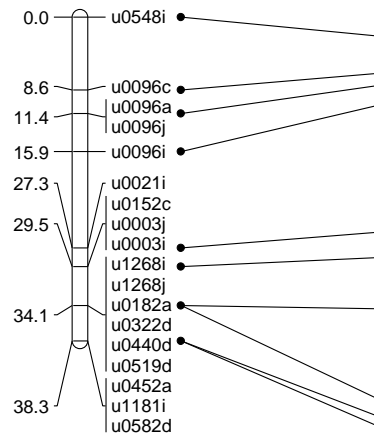**LG06-MERGE**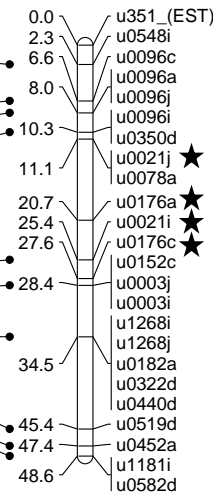**LG06-FEMALE**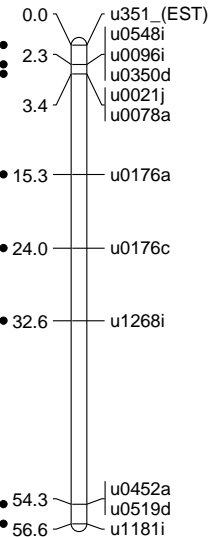

**LG07-MALE-1**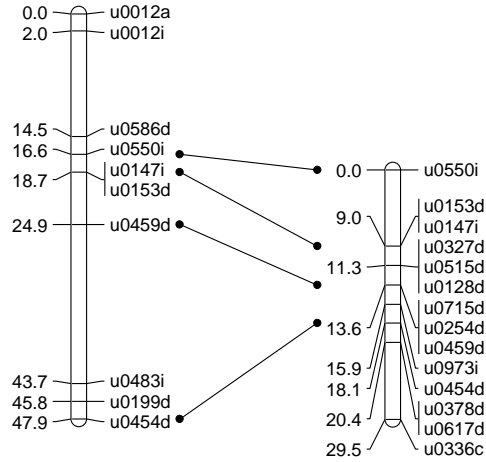**LG07-MALE-2**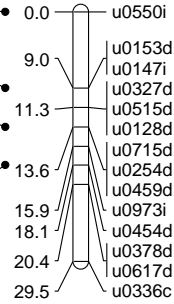**LG07-MALE-MERGE**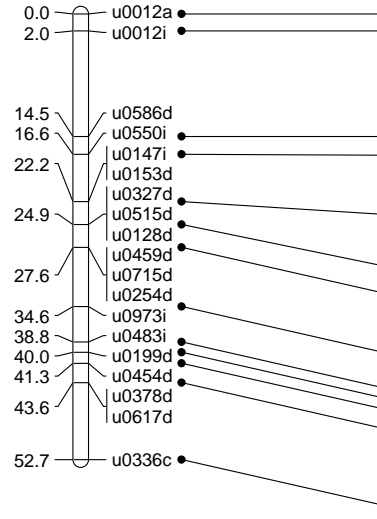**LG07-MERGE**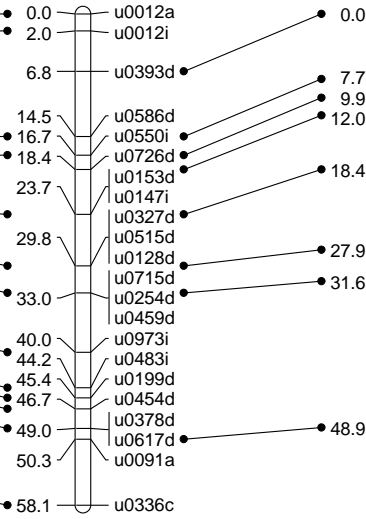**LG07-FEMALE**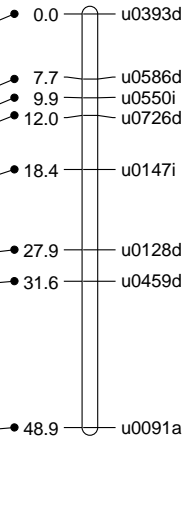**LG08-MALE-1**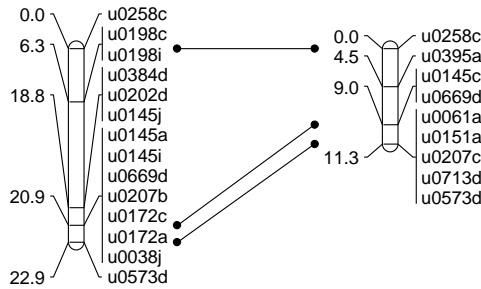**LG08-MALE-2**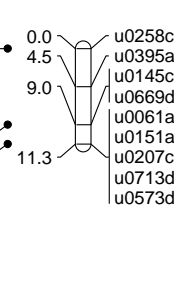**LG08-MALE-MERGE**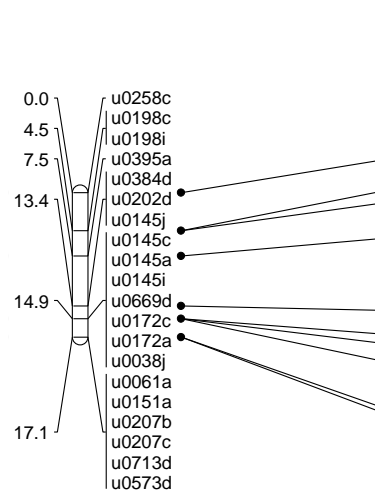**LG08-MERGE**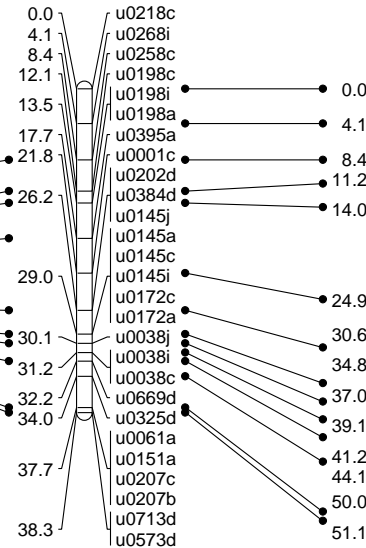**LG08-FEMALE**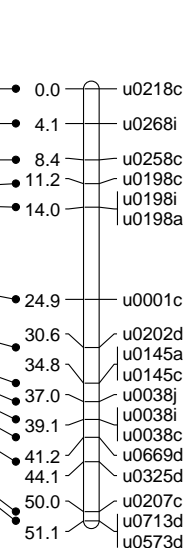

**LG09-MALE-1**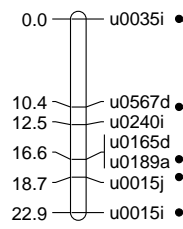**LG09-MALE-2**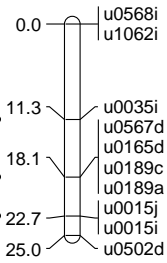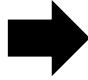**LG09-MALE-MERGE**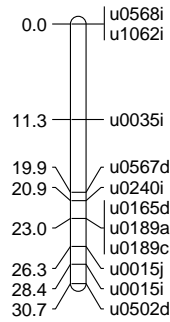**LG09-MERGE**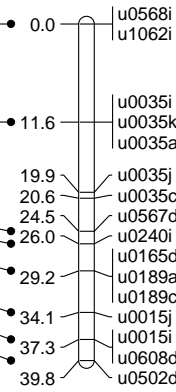**LG09-FEMALE**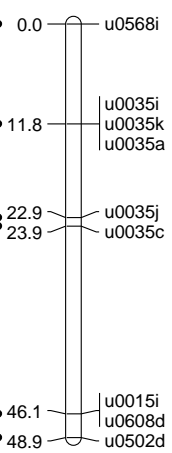**LG10-MALE-1**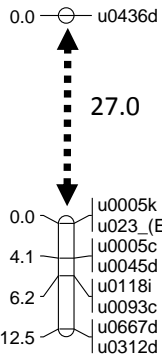**LG10-MALE-2**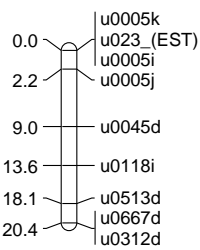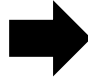**LG10-MALE-MERGE**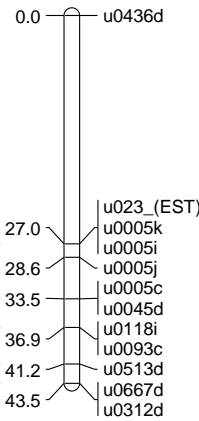**LG10-MERGE**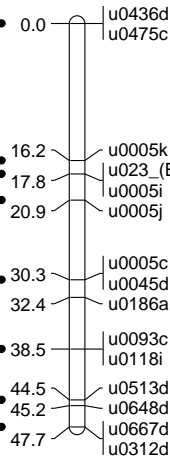**LG10-FEMALE**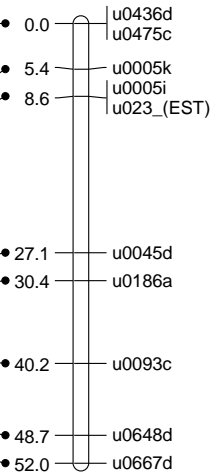

**LG11-MALE-1**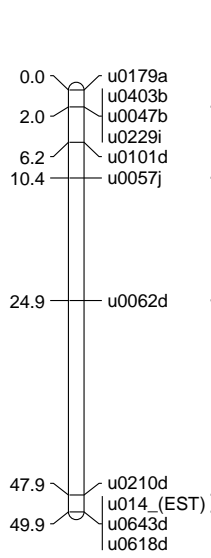**LG11-MALE-2**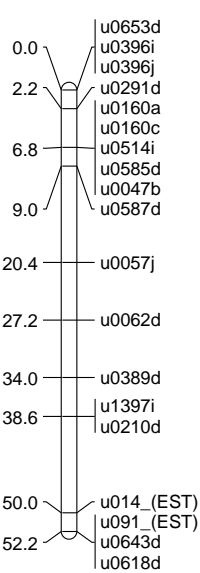**LG11-MALE-MERGE**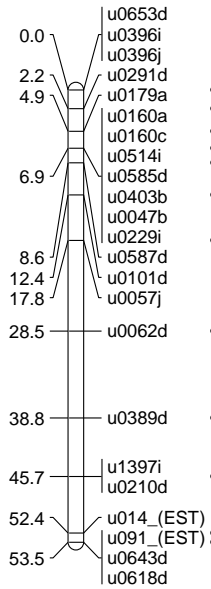**LG11-MERGE**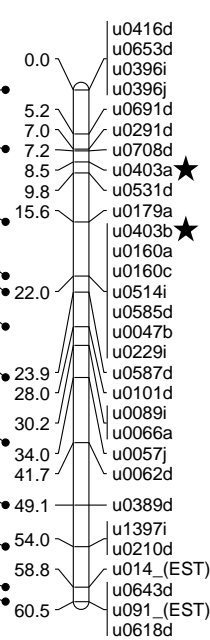**LG11-FEMALE**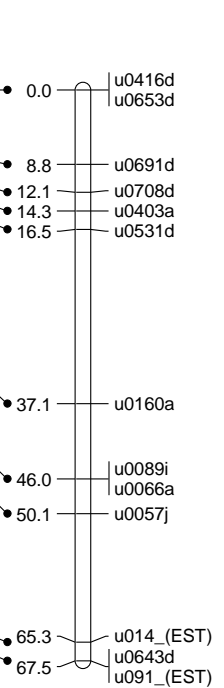**LG12-MALE-1**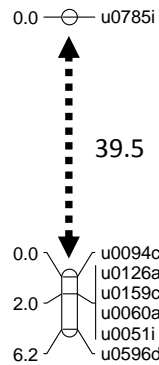**LG12-MALE-2**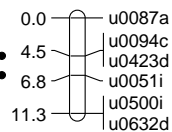**LG12-MALE-MERGE**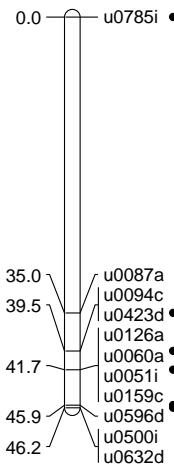**LG12-MERGE**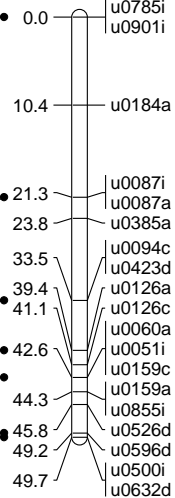**LG12-FEMALE**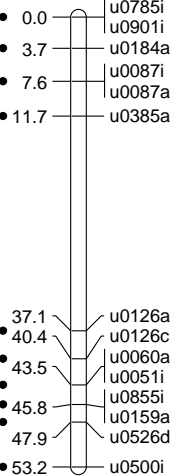

**LG13-MALE-1**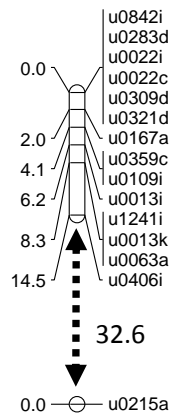**LG13-MALE-2**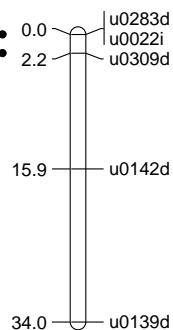**LG13-MALE-MERGE**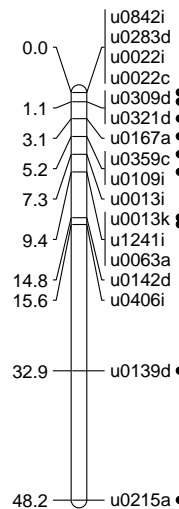**LG13-MERGE**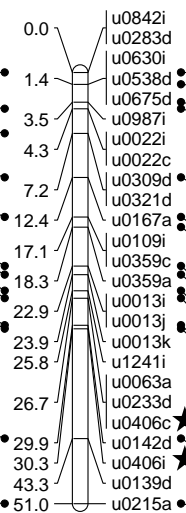**LG13-FEMALE**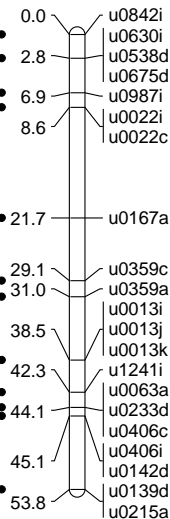**LG14-MALE-1**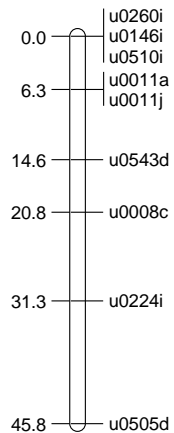**LG14-MALE-2**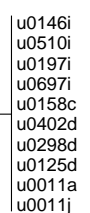**LG14-MALE-MERGE**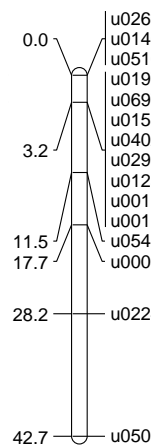**LG14-MERGE**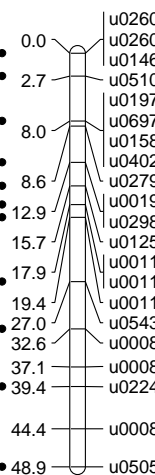**LG14-FEMALE**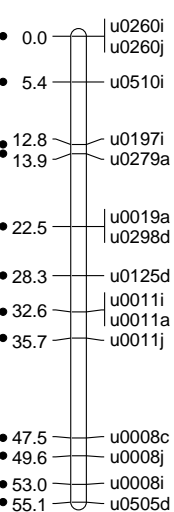

**LG15-MALE-1**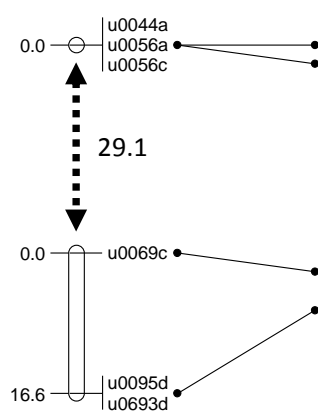**LG15-MALE-2**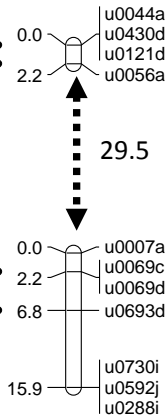**LG15-MALE-MERGE**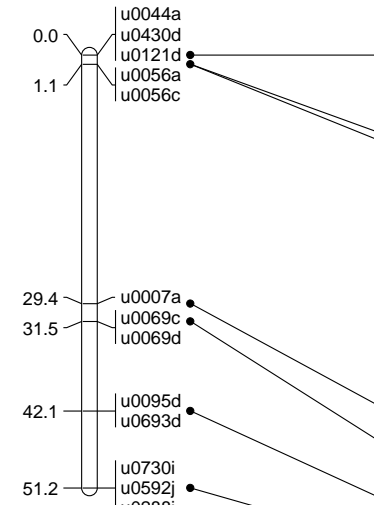**LG15-MERGE**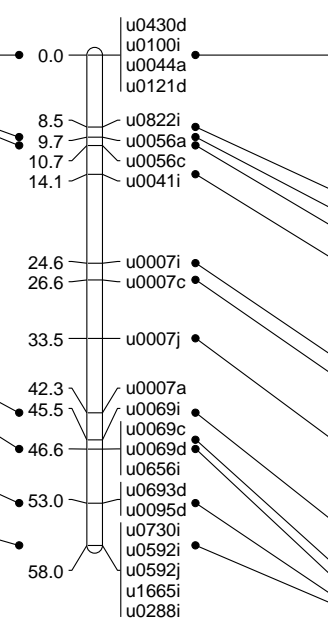**LG15-FEMALE**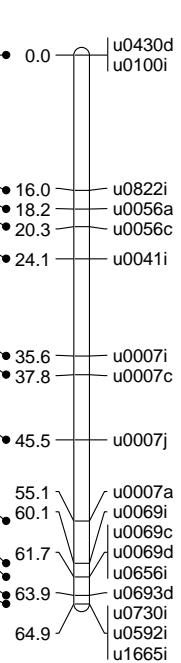**LG16-MALE-1**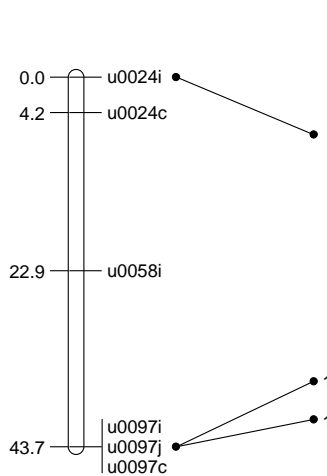**LG16-MALE-2**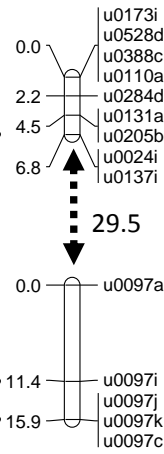**LG16-MALE-MERGE**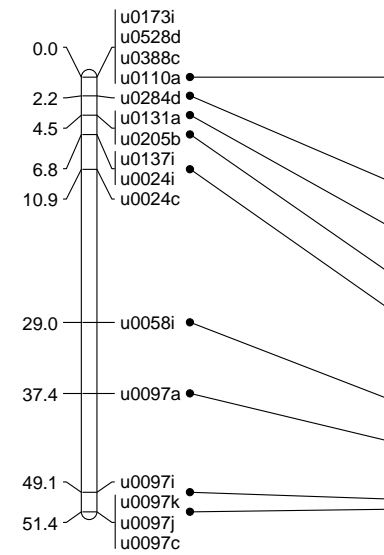**LG16-MERGE**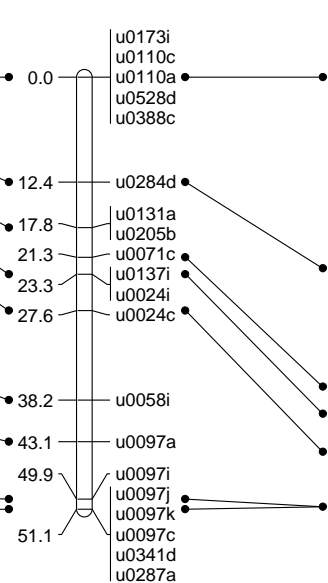**LG16-FEMALE**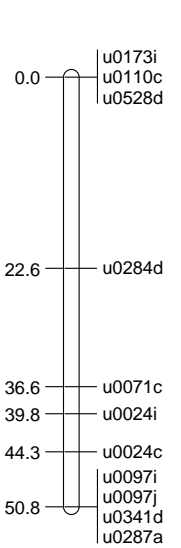



**LG17-MALE-1****LG17-MALE-2**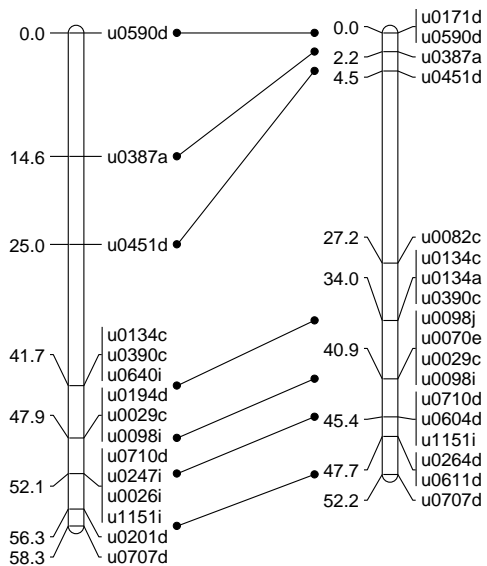**LG17-MALE-MERGE****LG17-MERGE**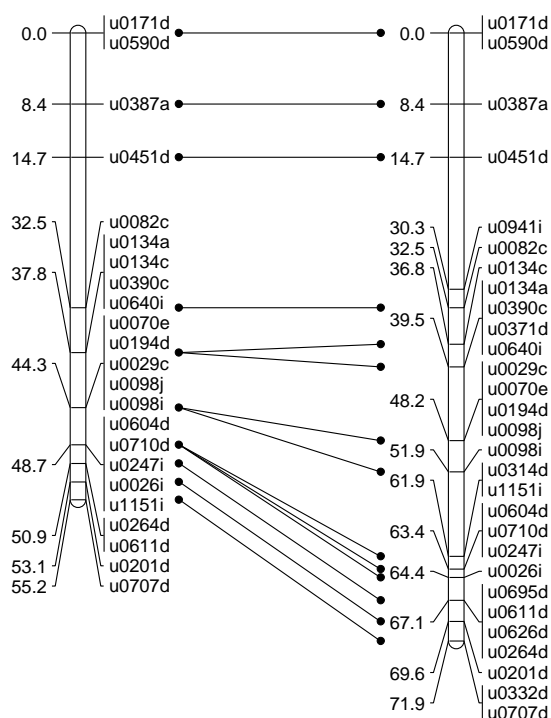**LG17-FEMALE**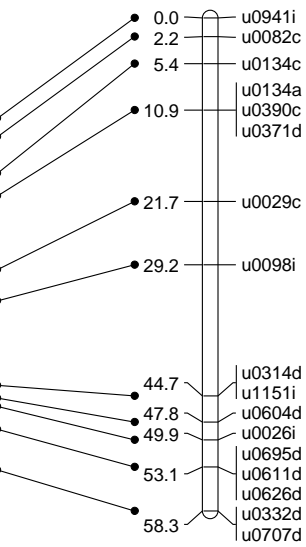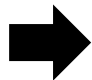**LG18-MALE-1****LG18-MALE-2**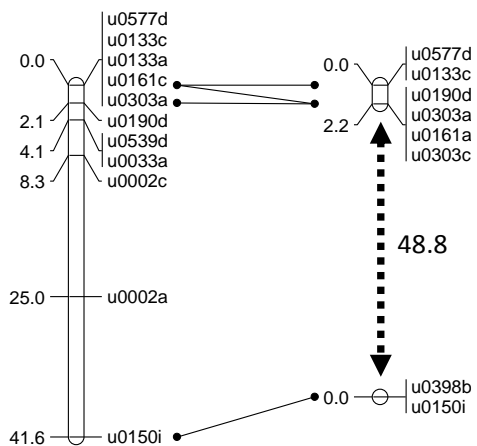**LG18-MALE-MERGE****LG18-MERGE**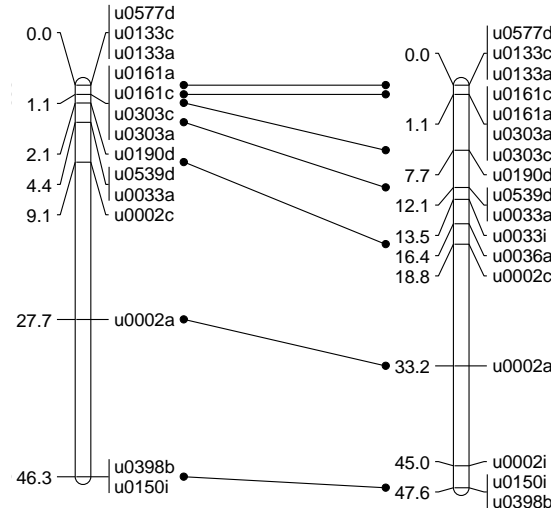**LG18-FEMALE**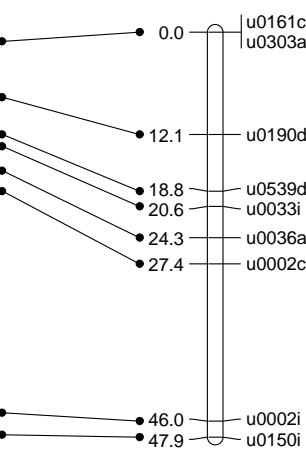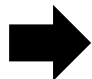

LG19-MALE-1

LG19-MALE-2

LG19-MALE-MERGE

LG19-MERGE

LG19-FEMALE

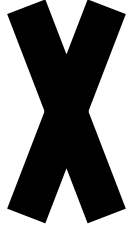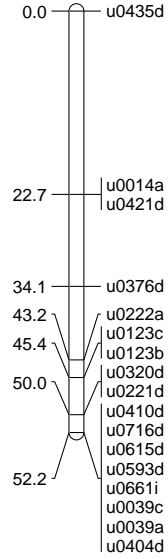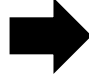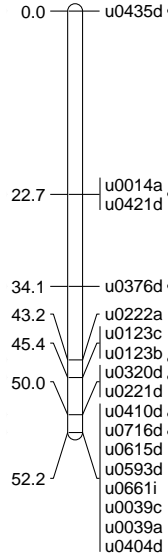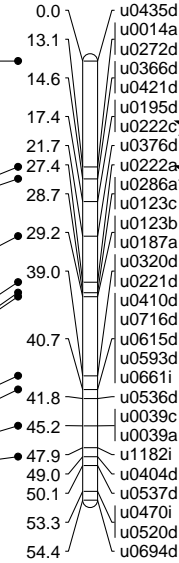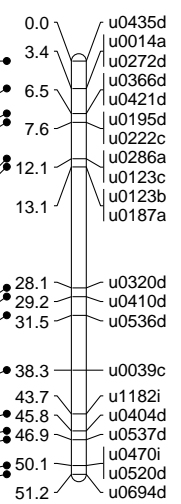

LG20-MALE-1

LG20-MALE-2

LG20-MALE-MERGE

LG20-MERGE

LG20-FEMALE

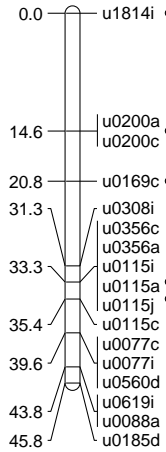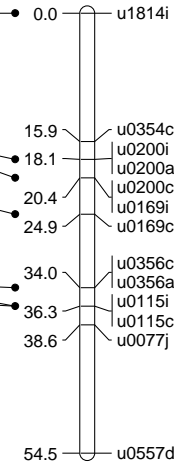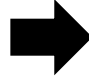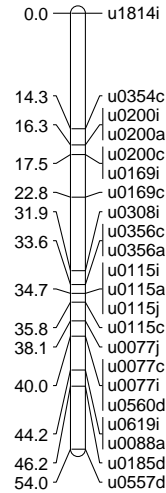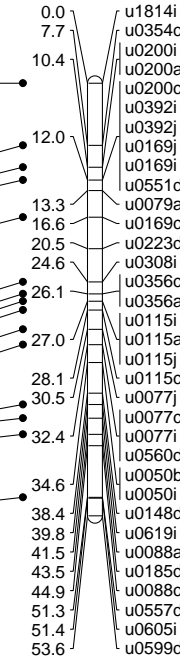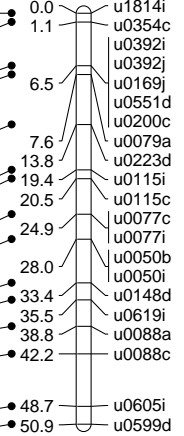

**LG21-MALE-1**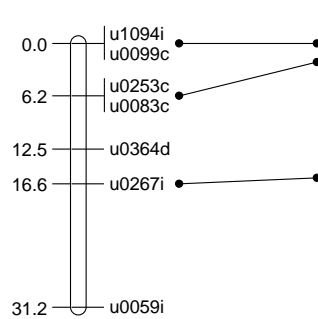**LG21-MALE-2**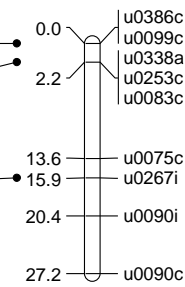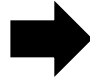**LG21-MALE-MERGE**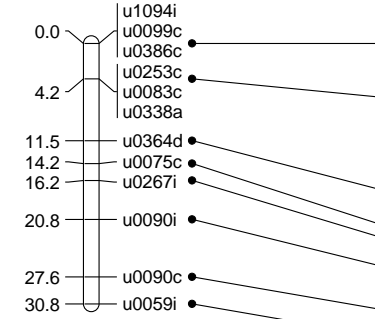**LG21-MERGE**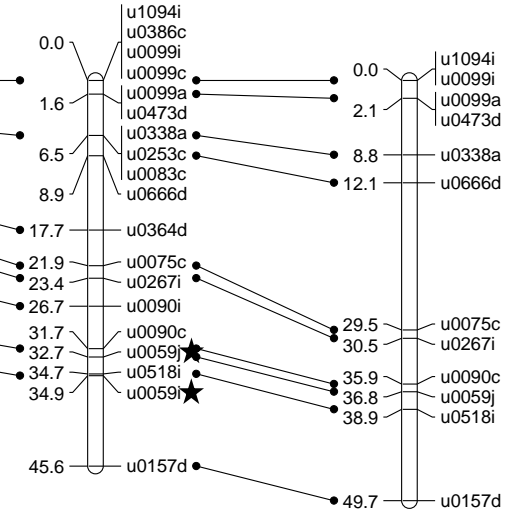**LG21-FEMALE**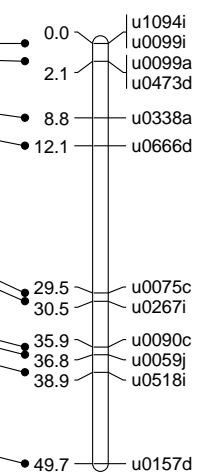**LG22-MALE-1**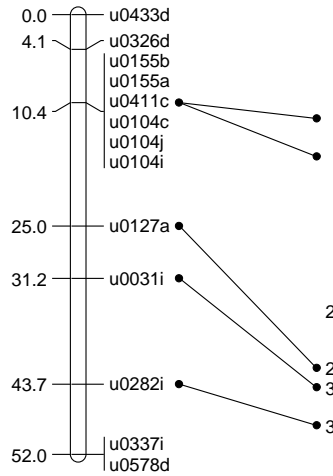**LG22-MALE-2**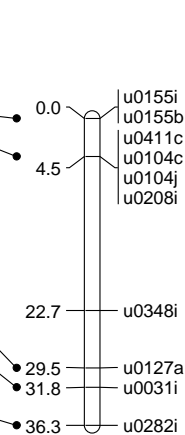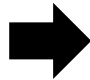**LG22-MALE-MERGE**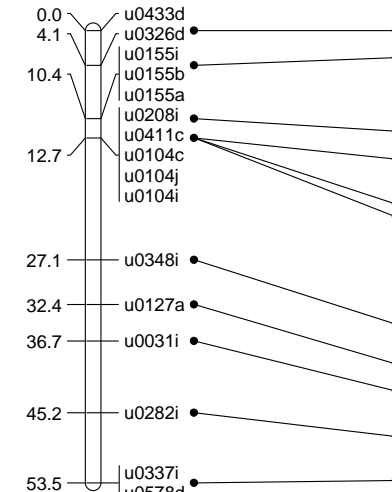**LG22-MERGE**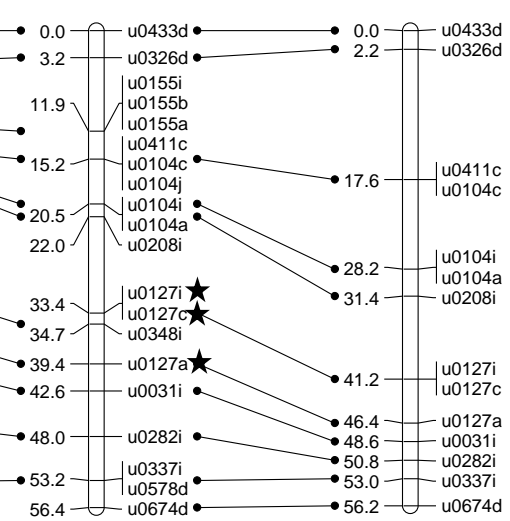**LG22-FEMALE**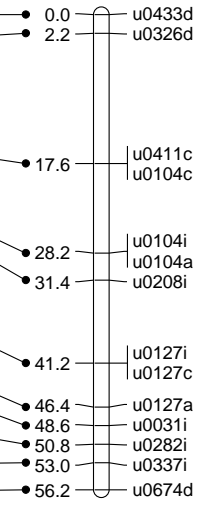

**LG23-MALE-1**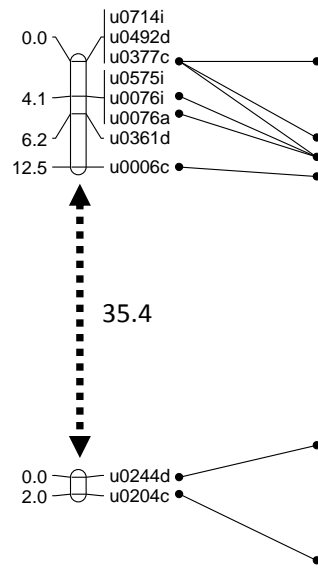**LG23-MALE-2**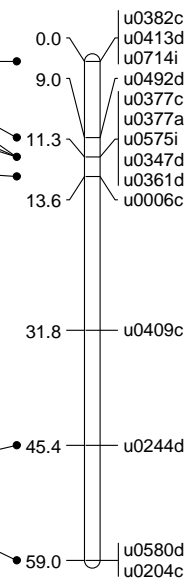**LG23-MALE-MERGE**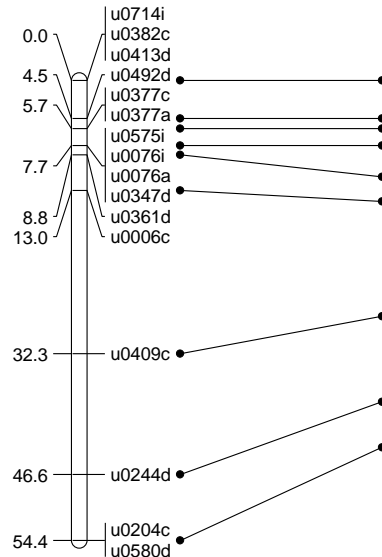**LG23-MERGE**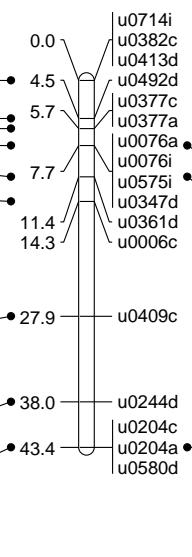**LG23-FEMALE**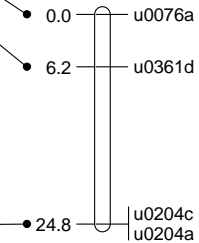**LG24-MALE-1**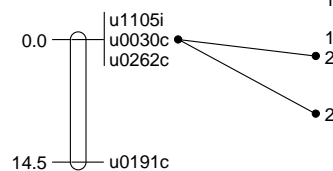**LG24-MALE-2**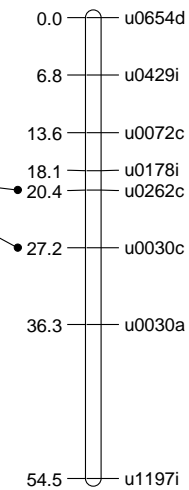**LG24-MALE-MERGE**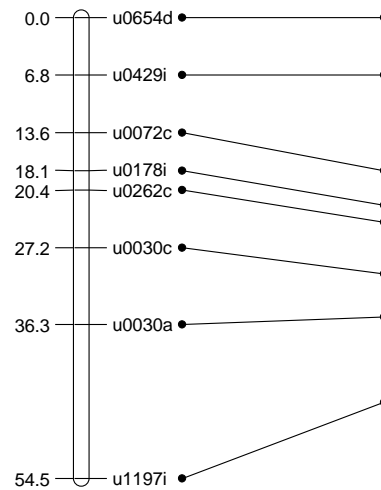**LG24-MERGE**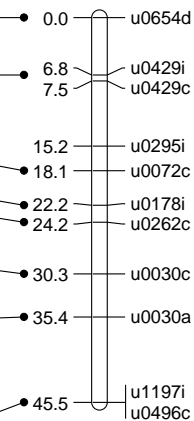**LG24-FEMALE**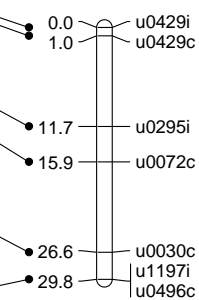

**LG25-MALE-1**

**LG25-MALE-2**

**LG25-MALE-MERGE**

**LG25-MERGE**

**LG25-FEMALE**

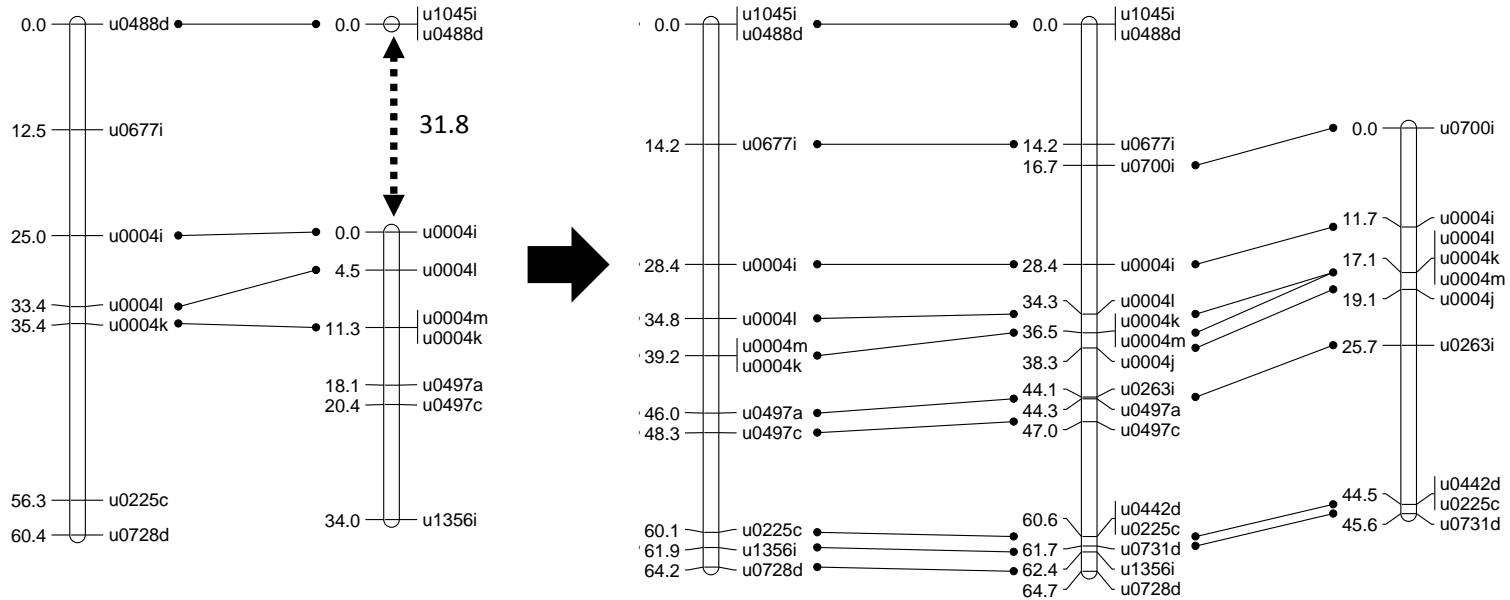

↑  
 ↓  
 Denotes the estimated distance (Below LOD 3.0) in Centimorgans. Used to create Merged Maps.

★ Denotes Inconsistent placement of scaffolds in merged map.
